# Supplementary material for: Comparative Proteomics Analysis of Urine Reveals Down-Regulation of Acute Phase Response Signaling and LXR/RXR Activation Pathways in Prostate Cancer
Source: MDPI journal article supplement (doi:10.3390/proteomes6010001), 2017-12-29

**Supplementary document 2.** Identification and quantification data of the 35 putative biomarkers for PCa in this study (proteins with statistically significant differential abundance in PCa in more than one group comparison (given in Table 1 and Figure 2) produced by Progenesis QI for proteomics V 3.0 (Nonlinear dynamics, Waters Corporation). The protein abundances in individual runs were normalized using the run that is least different from all other runs. Search settings included up to one missed cleavage, carbamidomethyl cysteine as a fixed modification and the methionine oxidation as variable modification. A minimum of 2 fragment ion matches were required per peptide identification and 5 fragment ion matches per protein identification with at least 2 peptide matches per protein identification. Quantification was done by Hi-N, using 3 most abundant peptides per protein. For each of the proteins, a table with the identified peptides as well as representative MS/MS spectra of peptides used to quantify protein expression levels is given. Peptide fragment annotation indicates the peaks that correspond to fragment ions from the peptide, and marks the positions of these ions within the peptide sequence. Peak colors legend: **Red** = y-series ion; **Blue** = b-series ion; **Green** = neutral loss ion.

**P08571**

Monocyte differentiation antigen CD14 OS=Homo sapiens GN=CD14 PE=1 SV=2  
8 peptides

| Sequence              | Peptide Ion | Score | Hits | Mass      | Charge | Tags | Conflicts | Modifications          | In quantitation | Average Normalised Abundances |           |           |           |
|-----------------------|-------------|-------|------|-----------|--------|------|-----------|------------------------|-----------------|-------------------------------|-----------|-----------|-----------|
|                       |             |       |      |           |        |      |           |                        |                 | PCa                           | BPH       | Bc        | Re        |
| AFPALTSLDLSDNPGLGER   | 1607        | 9.60  | 22   | 1971.9901 | 2      |      | 0         |                        | yes             | 1.11e+006                     | 4.58e+005 | 3.58e+005 | 6.19e+005 |
| ATVNPSAPR             | 1193        | 8.35  | 17   | 911.4822  | 2      |      | 0         |                        | yes             | 3.90e+005                     | 2.69e+005 | 1.55e+005 | 2.62e+005 |
| CMVSSALNSLNSFAGLEQVPK | 2586        | 6.97  | 9    | 2451.1047 | 3      |      | 1         | [1] Carbamidomethyl C  | no              | 5.59e+005                     | 7.24e+005 | 2.66e+005 | 6.00e+005 |
| CMVSSALNSLNSFAGLEQVPK | 4104        | ---   | ---  | 2451.1066 | 2      |      | 1         | [1] Carbamidomethyl C  | no              | 1.74e+005                     | 2.90e+004 | 1.37e+004 | 2.70e+005 |
| LTVGAAQVPAQLLVGALR    | 13206       | 8.14  | 3    | 1776.0680 | 2      |      | 0         |                        | no              | 9041.84                       | 1737.47   | 1314.00   | 1629.09   |
| QYADTVK               | 3322        | 8.42  | 5    | 823.3974  | 2      |      | 0         |                        | no              | 2.60e+005                     | 2.17e+005 | 2.58e+005 | 2.17e+005 |
| QYADTVK               | 8861        | 8.42  | 5    | 823.3461  | 1      |      | 0         |                        | no              | 1.86e+005                     | 1.06e+005 | 1.08e+005 | 1.67e+005 |
| RVDADADPR             | 1529        | 8.23  | 19   | 1013.4823 | 2      |      | 0         |                        | no              | 8.47e+004                     | 6.18e+004 | 3.12e+004 | 6.92e+004 |
| RVDADADPR             | 1995        | 7.52  | 3    | 1013.4811 | 2      |      | 0         |                        | no              | 7.46e+004                     | 2.67e+004 | 1.45e+004 | 2.69e+004 |
| VLDLSNR               | 1266        | 8.82  | 15   | 975.4798  | 2      |      | 0         | [6] Carbamidomethyl C  | no              | 1.98e+005                     | 1.01e+005 | 9.70e+004 | 1.22e+005 |
| VLSIAQAHSPAFSCQVR     | 2033        | 8.50  | 17   | 1998.9711 | 3      |      | 0         | [14] Carbamidomethyl C | yes             | 6.49e+005                     | 4.78e+005 | 2.82e+005 | 4.54e+005 |
| VLSIAQAHSPAFSCQVR     | 2973        | 8.70  | 2    | 1999.0043 | 3      |      | 0         | [14] Carbamidomethyl C | no              | 2.46e+005                     | 7.93e+004 | 4.71e+004 | 6.29e+004 |

Fragment ions for: AFPALTSLDLSDNPGLGER

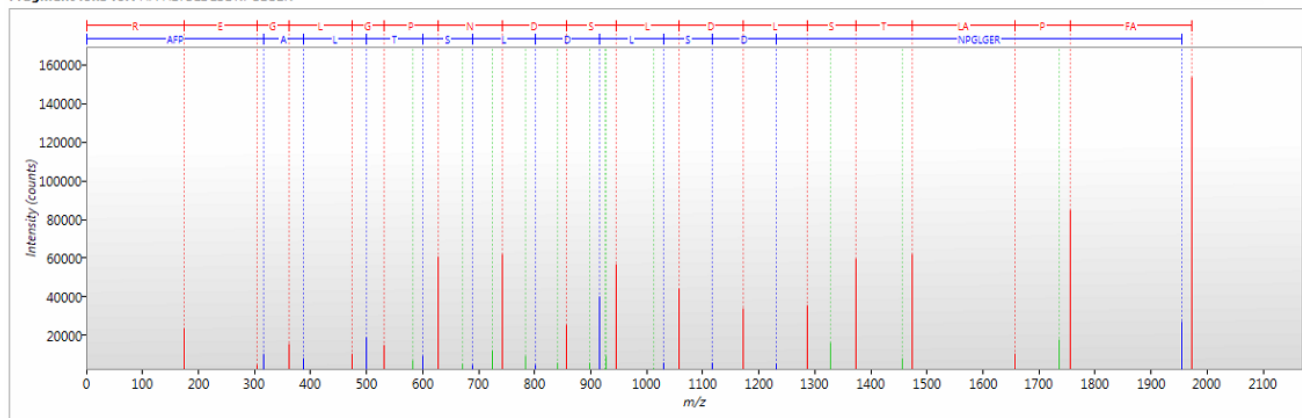

Fragment ions for: ATVNPSAPR

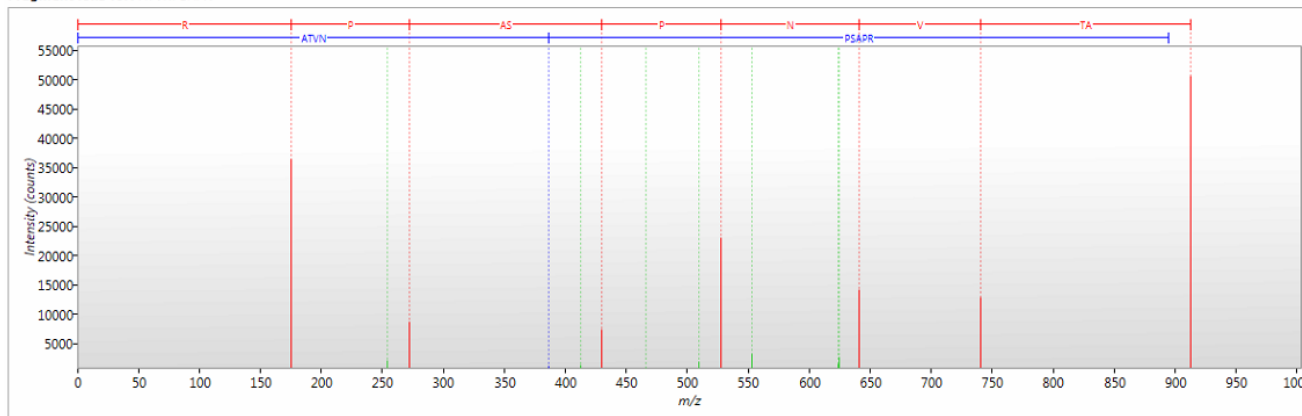

Fragment ions for: VLSIAQAHSPAFSCEQVR

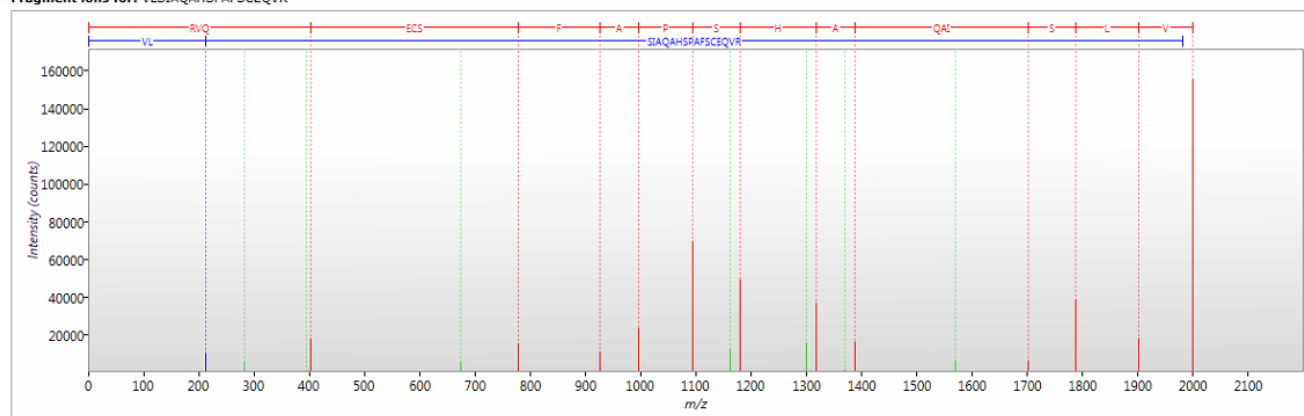

Actin\_aortic smooth muscle OS=Homo sapiens GN=ACTA2 PE=1 SV=1  
3 peptides

| Sequence                              | Peptide Ion | Score | Hits | Mass      | Charge | Tags | Conflicts | Modifications                                                       | In quantitation | Average Normalised Abundances |           |           |           |
|---------------------------------------|-------------|-------|------|-----------|--------|------|-----------|---------------------------------------------------------------------|-----------------|-------------------------------|-----------|-----------|-----------|
|                                       |             |       |      |           |        |      |           |                                                                     |                 | PcA                           | SPH       | Bc        | Rc        |
| CEEDSTALVCDNGSGLCK                    | 1150        | 5.58  | 2    | 2142.8759 | 3      |      | 0         | [1] Carbamidomethyl C [11] Carbamidomethyl C [18] Carbamidomethyl C | yes             | 1.40e+005                     | 8.33e+004 | 9.61e+005 | 7.53e+004 |
| CEEDSTALVCDNGSGLCK                    | 3717        | 6.34  | 2    | 2142.8534 | 2      |      | 0         | [1] Carbamidomethyl C [11] Carbamidomethyl C [18] Carbamidomethyl C | yes             | 1.50e+005                     | 6.25e+005 | 5.52e+005 | 3.26e+005 |
| YPIEHGIIITNVDDMEKIVVHHSFYNELR         | 11856       | 6.28  | 2    | 3442.7453 | 5      |      | 0         |                                                                     | yes             | 1.68e+005                     | 4.49e+005 | 1.18e+006 | 6.37e+005 |
| YSVIVIGGSILASLSTFQQMIIISKQYDEAGPSIVHR | 35065       | 6.01  | 3    | 4082.8749 | 4      |      | 0         |                                                                     | no              | 2.75e+005                     | 3.62e+004 | 1548.87   | 5.06e+004 |

Fragment ions for: CEEEDSTALVCDNGSGLCK

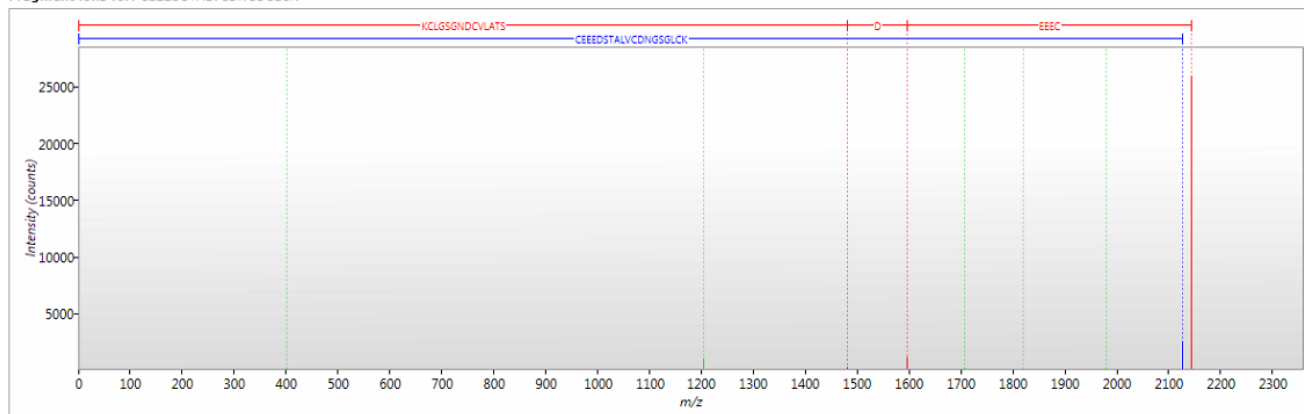

Fragment ions for: CEEEDSTALVCDNGSGLCK

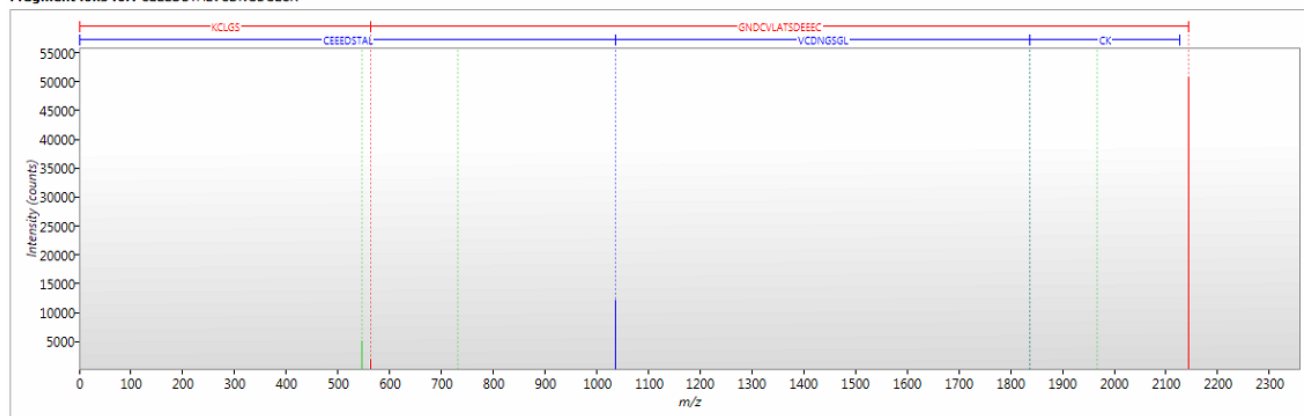

Fragment ions for: YPIEHGIVTNWDDMEKIWHHTFYNELR

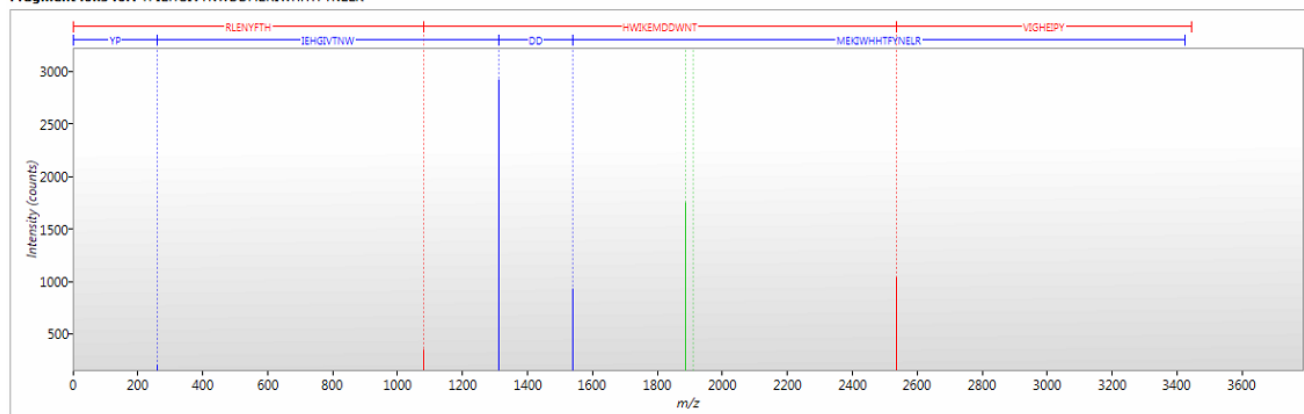

Alpha-2-HS-glycoprotein OS=Homo sapiens GN=AHSG PE=1 SV=1  
9 peptides

| Sequence                        | Peptide Ion | Score | Hits | Mass      | Charge | Tags | Conflicts | Modifications                               | In quantitation | Average Normalised Abundances |           |           |           |
|---------------------------------|-------------|-------|------|-----------|--------|------|-----------|---------------------------------------------|-----------------|-------------------------------|-----------|-----------|-----------|
|                                 |             |       |      |           |        |      |           |                                             |                 | PCa                           | BPH       | Bc        | Rc        |
| AQLVPLPPSTYVEFTVSGTDCVAK        | 7440        | 8.35  | 20   | 2578.2956 | 2      |      | 0         | [21] Carbamidomethyl C                      | yes             | 1.03e+006                     | 7.79e+004 | 9.75e+004 | 4.48e+005 |
| AQLVPLPPSTYVEFTVSGTDCVAKEATEAAK | 11451       | 7.74  | 6    | 3278.6310 | 3      |      | 0         | [21] Carbamidomethyl C                      | no              | 1.44e+005                     | 1.13e+004 | 7236.49   | 6.05e+004 |
| CDSSPDSAEDEVIR                  | 26963       | 7.96  | 2    | 1336.5567 | 3      |      | 0         | [1] Carbamidomethyl C                       | no              | 1042.38                       | 1289.09   | 396.14    | 369.53    |
| EHAVEGDCDFQLLK                  | 2392        | 6.48  | 2    | 1659.8029 | 3      |      | 0         | [8] Carbamidomethyl C                       | no              | 1.62e+005                     | 3.75e+005 | 1.74e+005 | 1.73e+005 |
| EHAVEGDCDFQLLK                  | 3226        | 9.08  | 9    | 1659.8030 | 3      |      | 0         | [8] Carbamidomethyl C                       | no              | 6.87e+004                     | 1.24e+005 | 1.28e+005 | 1.09e+005 |
| EHAVEGDCDFQLLK                  | 48117       | 7.57  | 2    | 1659.7538 | 1      |      | 0         | [8] Carbamidomethyl C                       | no              | 13.40                         | 0.00      | 1207.73   | 30.73     |
| FSVYYAK                         | 743         | 8.96  | 34   | 812.4408  | 2      |      | 0         |                                             | no              | 3.65e+005                     | 5.34e+005 | 2.97e+005 | 3.51e+005 |
| FSVYYAK                         | 1409        | 8.91  | 2    | 812.4034  | 2      |      | 0         |                                             | no              | 3.61e+005                     | 3.66e+005 | 3.38e+005 | 2.75e+005 |
| HTLNQIDEVK                      | 1367        | 9.49  | 6    | 1195.6177 | 2      |      | 0         |                                             | no              | 1.46e+005                     | 3.08e+004 | 6.92e+004 | 1.55e+004 |
| QPNCDDEPETEEAALVAIDYINQNLPIVGYK | 25585       | 10.01 | 16   | 3362.5197 | 2      |      | 0         | [4] Carbamidomethyl C                       | no              | 1.48e+004                     | 241.60    | 754.79    | 3927.96   |
| QPNCDDEPETEEAALVAIDYINQNLPIVGYK | 30935       | 9.86  | 2    | 3362.5106 | 2      |      | 0         | [4] Carbamidomethyl C                       | no              | 1.33e+004                     | 0.00      | 0.00      | 0.00      |
| TVVQPSVGAAAGPVVPPCPGR           | 2193        | 9.48  | 35   | 2015.0521 | 3      |      | 0         | [18] Carbamidomethyl C                      | yes             | 4.21e+005                     | 2.60e+005 | 1.53e+005 | 2.91e+005 |
| TVVQPSVGAAAGPVVPPCPGR           | 2286        | 9.48  | 34   | 2015.0407 | 2      |      | 0         | [18] Carbamidomethyl C                      | yes             | 5.58e+005                     | 2.10e+005 | 1.79e+005 | 4.63e+005 |
| VCQDCPLLALNDTR                  | 2683        | 6.51  | 2    | 1770.8115 | 2      |      | 0         | [2] Carbamidomethyl C [5] Carbamidomethyl C | yes             | 4.45e+005                     | 6.38e+005 | 4.79e+005 | 3.92e+005 |

Fragment ions for: AQLVPLPPSTYVEFTVSGTDCVAK

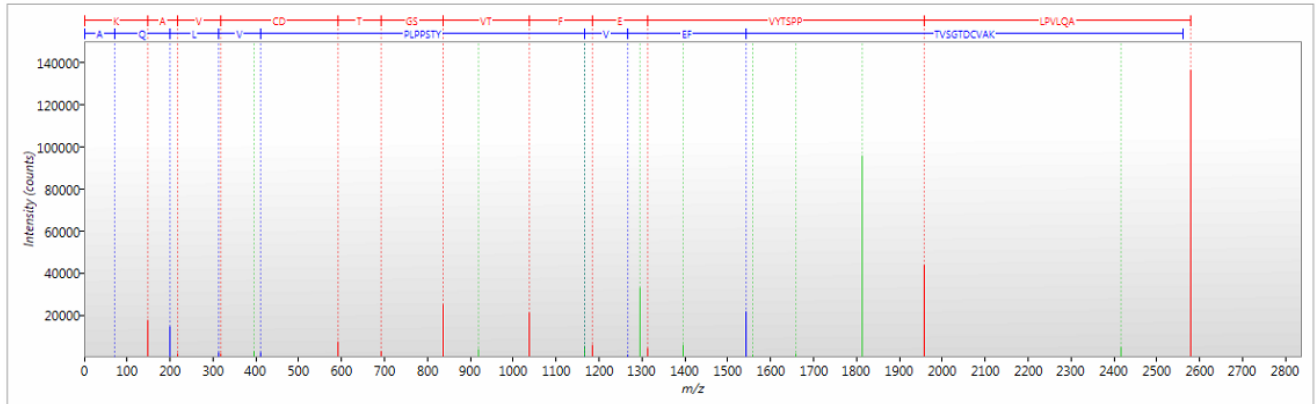

Fragment ions for: TVVQPSVGAAAGPVVPPCPGR

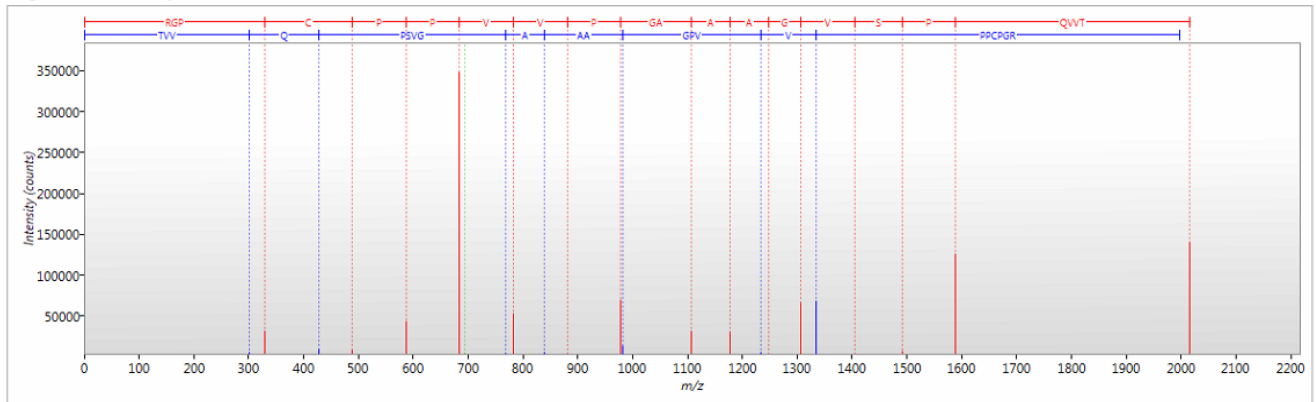

Fragment ions for: VCQDCPLLALNDTR

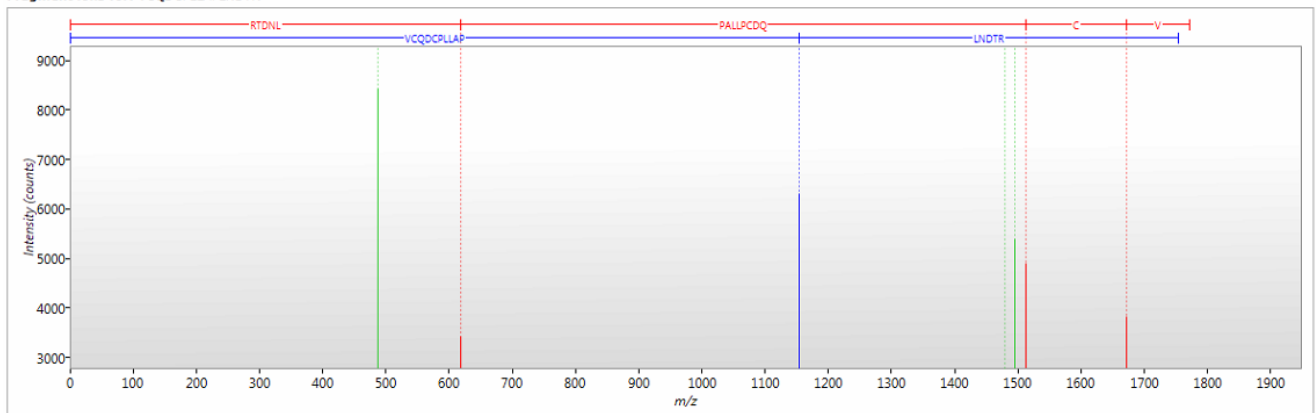

Alpha-amylase 1 O5=Homo sapiens GN=AMY1A PE=1 SV=2  
9 peptides

| Sequence                                          | Peptide Ion | Score | Hits | Mass      | Charge | Tags | Conflicts | Modifications                                 | In quantitation | Average Normalised Abundances |           |           |           |
|---------------------------------------------------|-------------|-------|------|-----------|--------|------|-----------|-----------------------------------------------|-----------------|-------------------------------|-----------|-----------|-----------|
|                                                   |             |       |      |           |        |      |           |                                               |                 | PCa                           | BPH       | Bc        | Rc        |
| ALVFV/DNHDNQR                                     | 3349        | 8.66  | 23   | 1426.6995 | 3      |      | 0         |                                               | no              | 3.88e+004                     | 3.08e+004 | 5147.43   | 6.14e+004 |
| DFFAPVPSYGVDFNDGK                                 | 3244        | 9.05  | 24   | 1813.8456 | 2      |      | 1         |                                               | yes             | 6.36e+005                     | 3.06e+005 | 1.28e+005 | 4.56e+005 |
| EVTINPDTT <sup>16</sup> CGNDVW <sup>16</sup> CEHR | 4172        | 5.97  | 4    | 2302.0265 | 3      |      | 0         | [10] Carbamidomethyl C [16] Carbamidomethyl C | no              | 1.52e+005                     | 5.15e+004 | 2.66e+004 | 1.64e+005 |
| EVTINPDTT <sup>16</sup> CGNDVW <sup>16</sup> CEHR | 8041        | 8.53  | 5    | 2301.9755 | 2      |      | 0         | [10] Carbamidomethyl C [16] Carbamidomethyl C | no              | 4.16e+004                     | 1.41e+004 | 6300.43   | 6.08e+004 |
| IYVSDGK                                           | 1405        | 9.15  | 24   | 895.4270  | 2      |      | 0         |                                               | no              | 2.18e+005                     | 1.99e+005 | 1.29e+005 | 2.29e+005 |
| IYVSDGK                                           | 8308        | 9.15  | 23   | 895.4154  | 1      |      | 0         |                                               | no              | 2.58e+004                     | 1.20e+004 | 1.12e+004 | 3.31e+004 |
| NVVDGQPFNTN <sup>16</sup> YDNGSNQVAFGR            | 4959        | 8.67  | 20   | 2584.1530 | 2      |      | 1         |                                               | no              | 1.52e+005                     | 1.06e+005 | 4.87e+004 | 2.84e+005 |
| SGNEDEFR                                          | 1796        | 8.12  | 5    | 952.3979  | 2      |      | 0         |                                               | no              | 3.83e+004                     | 4.28e+004 | 2.72e+004 | 8.30e+004 |
| TGSGDIENYNDATQVR                                  | 828         | 9.47  | 27   | 1738.7766 | 2      |      | 1         |                                               | yes             | 5.69e+005                     | 3.87e+005 | 1.83e+005 | 6.98e+005 |
| TSIVHLFEVIR                                       | 12668       | 6.36  | 2    | 1286.6785 | 3      |      | 1         |                                               | no              | 1082.51                       | 2.10e+004 | 7.72      | 4.21e+004 |
| WVDIALE <sup>8</sup> CER                          | 1288        | 9.17  | 17   | 1289.6045 | 2      |      | 0         | [8] Carbamidomethyl C                         | yes             | 4.74e+005                     | 2.75e+005 | 1.74e+005 | 3.72e+005 |
| WVDIALE <sup>8</sup> CER                          | 12939       | 9.17  | 9    | 1289.5980 | 1      |      | 0         | [8] Carbamidomethyl C                         | no              | 1.15e+004                     | 368.54    | 298.47    | 7586.60   |

Fragment ions for: DFFAPVPSYGVDFNDGK

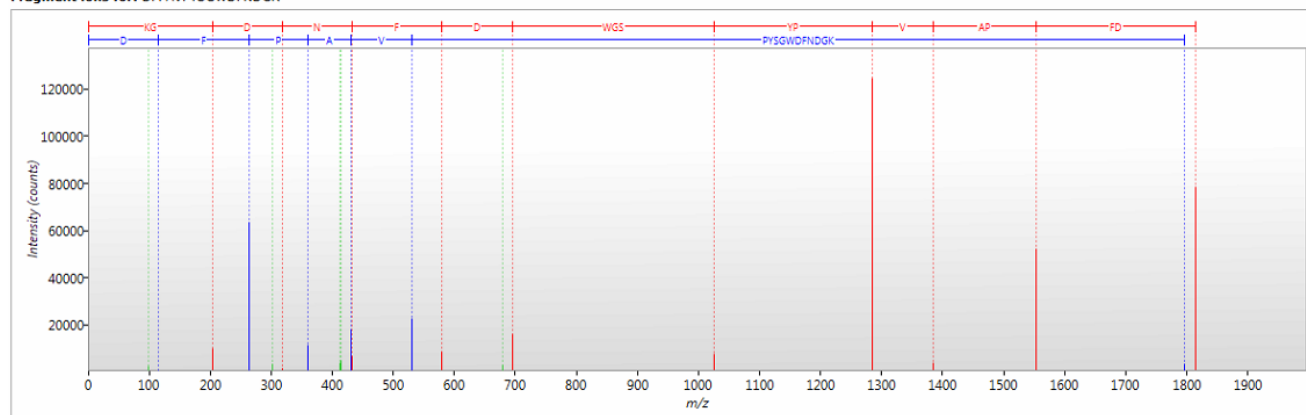

Fragment ions for: TGSGDIENYNDATQVR

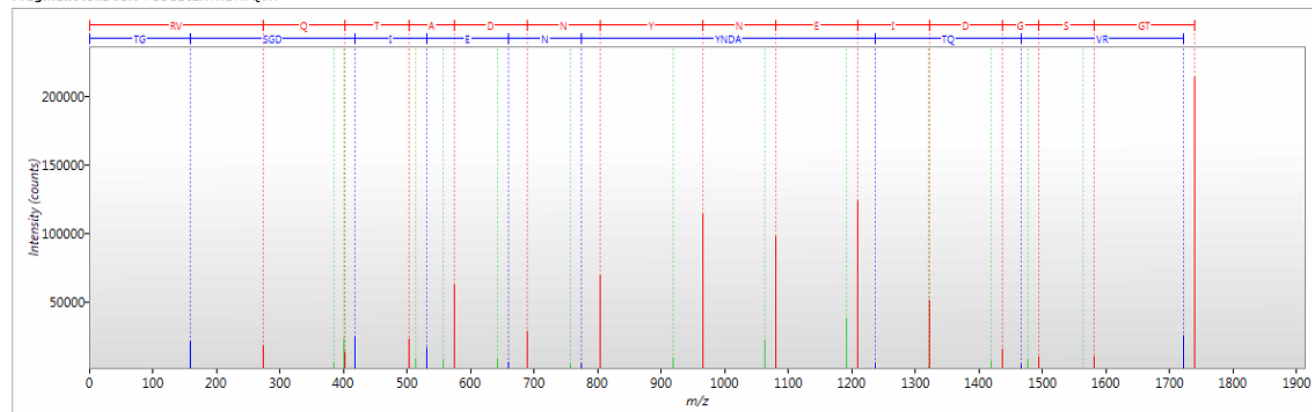

Fragment ions for: WVDIALE<sup>8</sup>CER

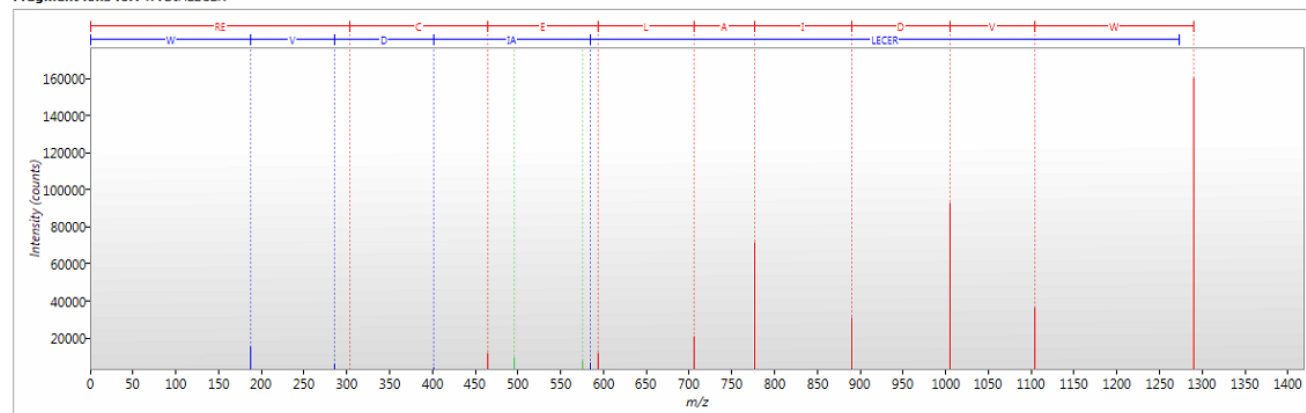

Alpha-amylase 2B OS=Homo sapiens GN=AMY2B PE=1 SV=1  
3 peptides

| Sequence                                          | Peptide Ion | Score | Hits | Mass      | Charge | Tags | Conflicts | Modifications                                | In quantitation | Average Normalised Abundances |           |           |           |
|---------------------------------------------------|-------------|-------|------|-----------|--------|------|-----------|----------------------------------------------|-----------------|-------------------------------|-----------|-----------|-----------|
|                                                   |             |       |      |           |        |      |           |                                              |                 | PCa                           | QPH       | Bc        | Rc        |
| NNVGVRIYVDVINHMSGNAVSGTSS <sup>CT</sup> SGSYFNPGR | 25324       | 6.20  | 2    | 4117.8162 | 3      |      | 0         | [1] Carbamidomethyl C [30] Carbamidomethyl C | yes             | 1.33e+004                     | 754.84    | 126.46    | 9901.89   |
| NVVDGQPF <sup>NI</sup> YDNGSNQVAFGR               | 4959        | 8.67  | 20   | 2584.1530 | 2      |      | 1         |                                              | yes             | 1.52e+005                     | 1.06e+005 | 4.87e+004 | 2.84e+005 |
| TSIVHLFEV <sup>R</sup>                            | 12668       | 6.36  | 2    | 1286.6785 | 3      |      | 1         |                                              | yes             | 1082.51                       | 2.10e+004 | 7.72      | 4.21e+004 |

Fragment ions for: CNNVGVRIYVDVINHMSGNAVSGTSSCTSGSYFNPGR

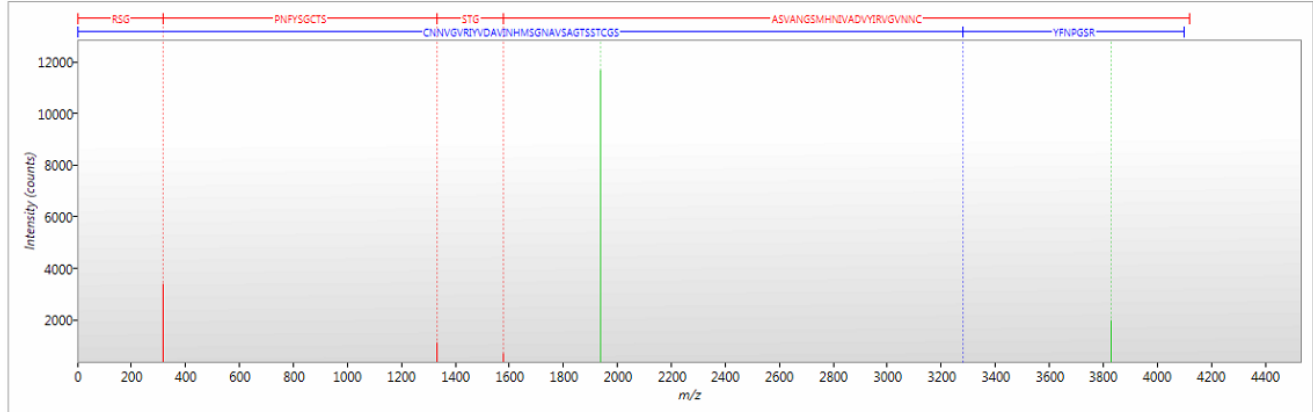

Fragment ions for: NVVDGQPFNIYDNGSNQVAFGR

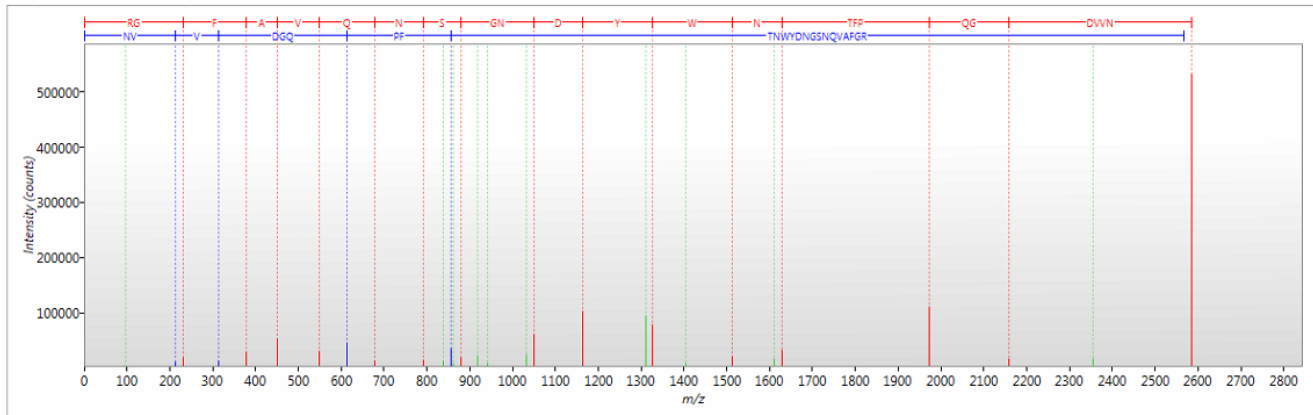

Fragment ions for: TSIVHLFEVR

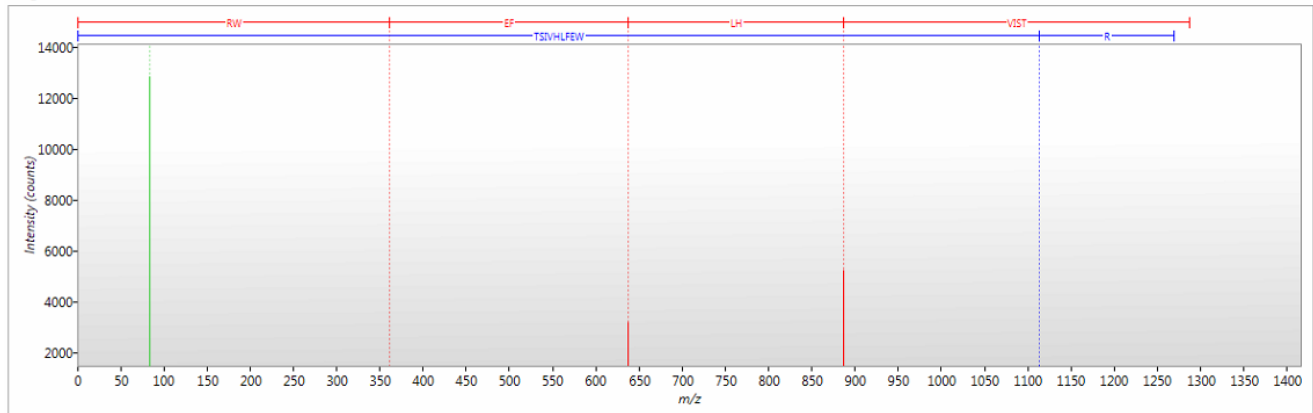

Alpha-enolase OS=Homo sapiens GN=ENO1 PE=1 SV=2  
2 peptides

| Sequence              | Peptide Ion | Score | Hits | Mass      | Charge | Tags | Conflicts | Modifications | In quantitation | Average Normalised Abundances |           |           |           |
|-----------------------|-------------|-------|------|-----------|--------|------|-----------|---------------|-----------------|-------------------------------|-----------|-----------|-----------|
|                       |             |       |      |           |        |      |           |               |                 | PCa                           | BPH       | Bc        | Rc        |
| DYPVVSIEDPFDQDDWGAWQK | 28693       | 7.37  | 5    | 2509.1077 | 2      |      | 0         |               | yes             | 2356.92                       | 3097.84   | 1849.30   | 4420.39   |
| TIAPALVSK             | 3471        | 7.36  | 6    | 898.4641  | 2      |      | 0         |               | yes             | 2.08e+005                     | 3.72e+005 | 3.15e+005 | 2.24e+005 |

Fragment ions for: DYPVVSIEDPFDQDDWGAWQK

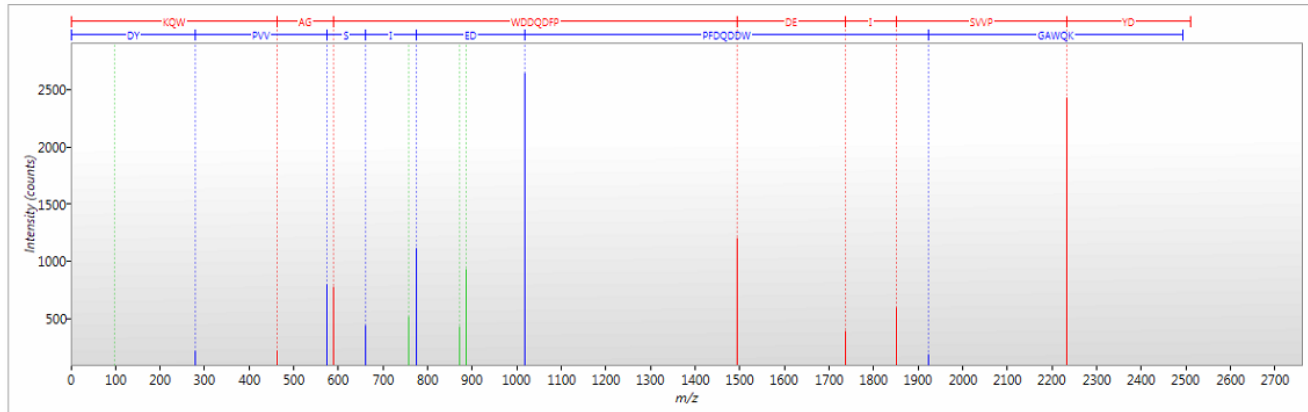

Fragment ions for: TIAPALVSK

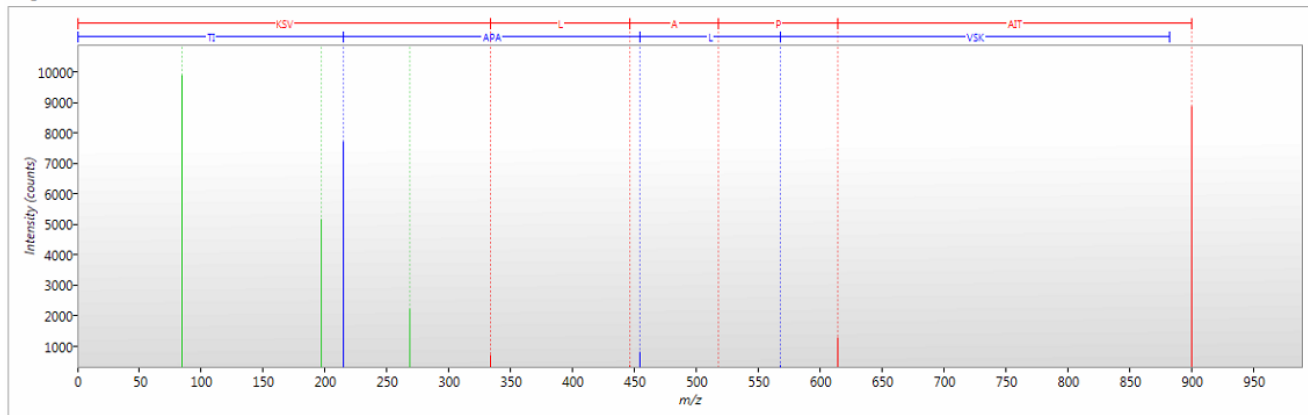

Annexin A1 OS=Homo sapiens GN=ANXA1 PE=1 SV=2  
5 peptides

| Sequence            | Peptide Ion | Score | Hits | Mass      | Charge | Tags | Conflicts | Modifications | In quantitation | Average Normalised Abundances |           |           |           |
|---------------------|-------------|-------|------|-----------|--------|------|-----------|---------------|-----------------|-------------------------------|-----------|-----------|-----------|
|                     |             |       |      |           |        |      |           |               |                 | PCa                           | BPH       | Bc        | Rc        |
| AAYLQETGKPLDETLK    | 4547        | 7.25  | 2    | 1775.8335 | 2      |      | 0         |               | yes             | 5.74e+005                     | 4.34e+005 | 3.06e+005 | 5.17e+005 |
| DITSDTSGDFR         | 29302       | 8.71  | 2    | 1212.5313 | 1      |      | 0         |               | yes             | 299.89                        | 26.93     | 0.00      | 5007.30   |
| GDRSEDFGVNEDLADSDAR | 203         | 7.96  | 3    | 2066.8788 | 2      |      | 0         |               | yes             | 1.99e+006                     | 7.27e+005 | 3.72e+005 | 3.18e+006 |
| GTDVNVFNTILTTR      | 53352       | 8.53  | 2    | 1549.6953 | 1      |      | 0         |               | no              | 289.55                        | 0.00      | 810.81    | 0.00      |
| TPAQFDADLR          | 48550       | 8.57  | 2    | 1261.5912 | 1      |      | 0         |               | no              | 599.28                        | 24.91     | 628.43    | 1788.98   |

Fragment ions for: AAYLQETGKPLDETLK

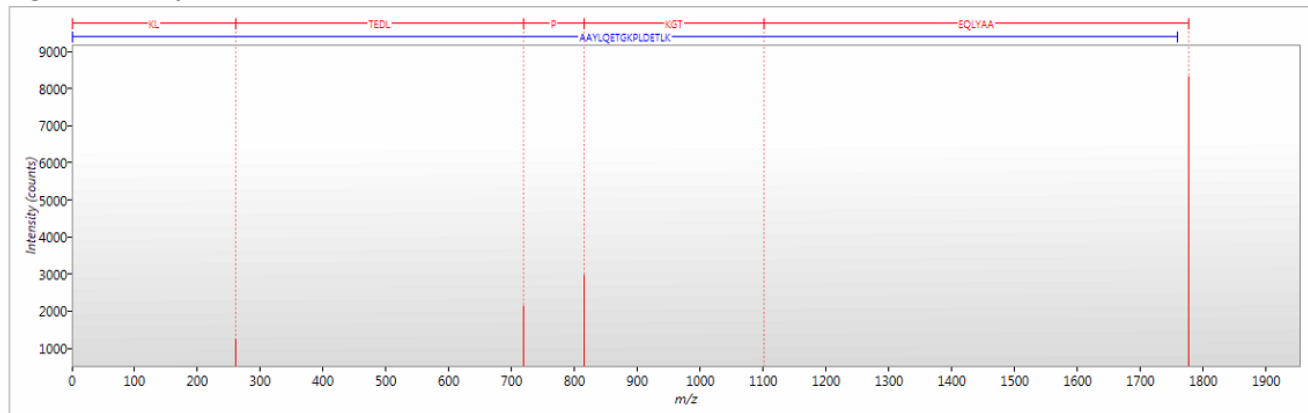

Fragment ions for: DITSDTSGDFR

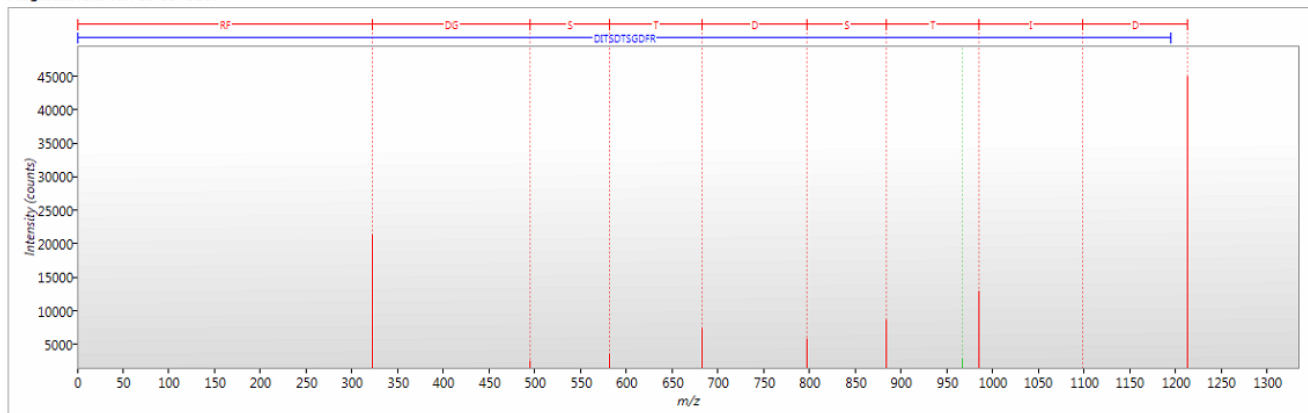

Fragment ions for: GDRSEDFGVNEDLADSDAR

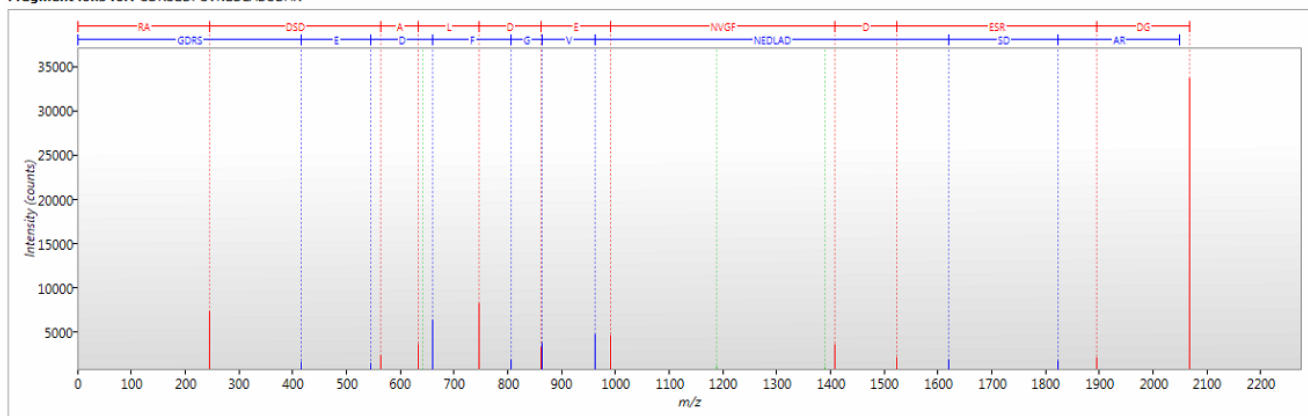



Azurocidin OS=Homo sapiens GN=AZU1 PE=1 SV=3  
2 peptides

| Sequence      | Peptide Ion | Score | Hits | Mass      | Charge | Tags | Conflicts | Modifications | In quantitation | Average Normalised Abundances |           |           |           |
|---------------|-------------|-------|------|-----------|--------|------|-----------|---------------|-----------------|-------------------------------|-----------|-----------|-----------|
|               |             |       |      |           |        |      |           |               |                 | PCa                           | BPH       | Bc        | Rc        |
| GPDDFFTR      | 2261        | 7.02  | 5    | 838.4108  | 2      |      | 0         |               | yes             | 6.48e+004                     | 1.83e+005 | 1.15e+005 | 7.90e+004 |
| QFPFLASIQNQGR | 32351       | 6.74  | 2    | 1504.7693 | 1      |      | 0         |               | yes             | 539.89                        | 88.25     | 3340.67   | 502.05    |

Fragment ions for: GPDDFFTR

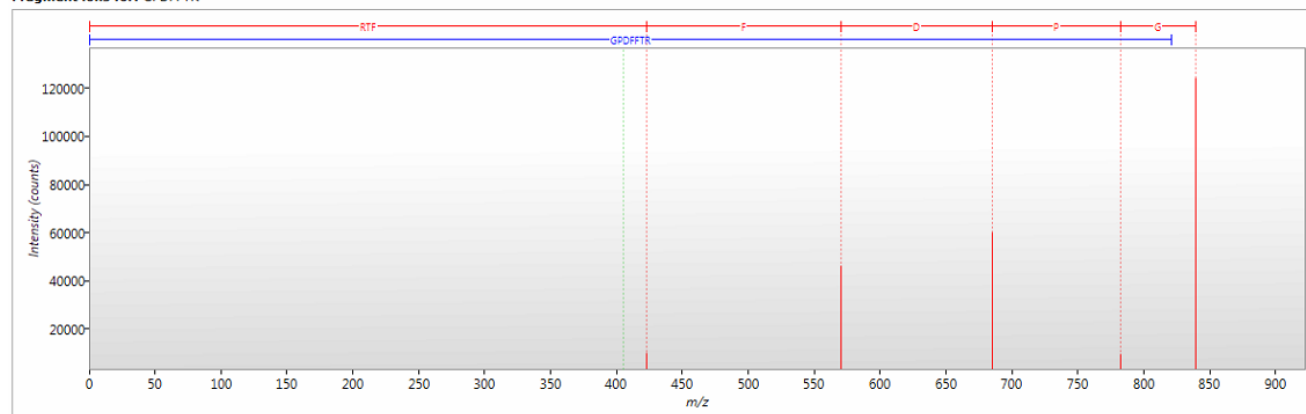

Fragment ions for: QFPFLASIQNQGR

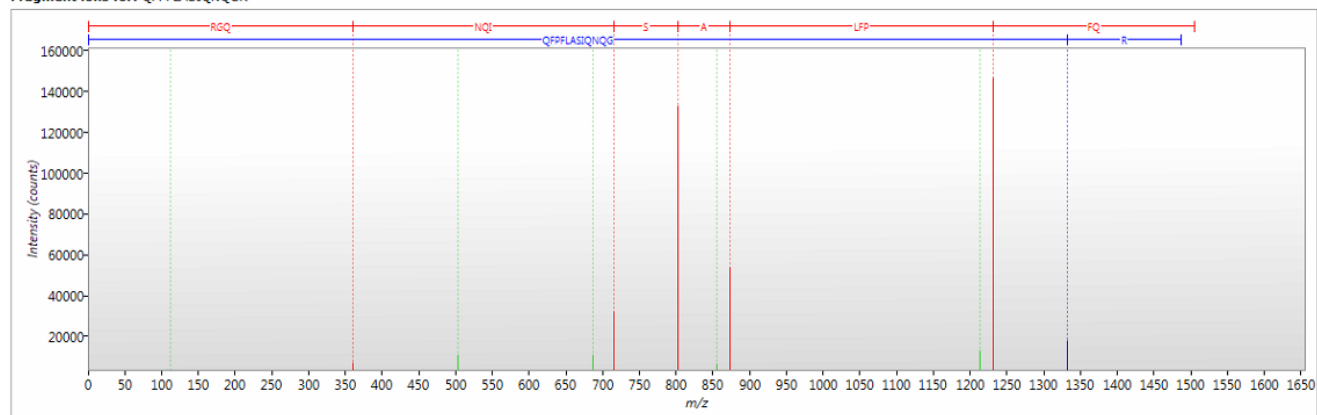

Clusterin O5=Homo sapiens GN=CLU PE=1 SV=1  
10 peptides

| Sequence                                                         | Peptide Ion | Score | Hits | Mass      | Charge | Tags | Conflicts | Modifications                                                                                         | In quantitation | Average Normalised Abundances |           |           |           |
|------------------------------------------------------------------|-------------|-------|------|-----------|--------|------|-----------|-------------------------------------------------------------------------------------------------------|-----------------|-------------------------------|-----------|-----------|-----------|
|                                                                  |             |       |      |           |        |      |           |                                                                                                       |                 | P/CA                          | SPH       | SE        | RE        |
| ALQEYR                                                           | 8245        | 8.70  | 5    | 778.3929  | 1      |      | 0         |                                                                                                       | no              | 7765.59                       | 4141.64   | 4177.99   | 1.38e+004 |
| ASSIDELFQDR                                                      | 2351        | 8.61  | 30   | 1392.7006 | 2      |      | 0         |                                                                                                       | no              | 3.93e+005                     | 2.89e+005 | 2.59e+005 | 2.96e+005 |
| ASSIDELFQDR                                                      | 39635       | 8.40  | 7    | 1392.6822 | 1      |      | 0         |                                                                                                       | no              | 18.26                         | 57.08     | 0.00      | 1022.51   |
| EILSVD <sup>CS</sup> TNNPSQAK                                    | 829         | 9.40  | 34   | 1761.8174 | 2      |      | 0         | [7] Carbamidomethyl C                                                                                 | yes             | 4.89e+005                     | 2.65e+005 | 2.29e+005 | 7.42e+005 |
| EILSVD <sup>CS</sup> TNNPSQAK                                    | 46692       | 9.40  | 8    | 1761.8062 | 1      |      | 0         | [7] Carbamidomethyl C                                                                                 | no              | 123.76                        | 0.00      | 196.31    | 2321.54   |
| EIQNAVNGVK                                                       | 17391       | 7.93  | 9    | 1070.5611 | 1      |      | 0         |                                                                                                       | no              | 6050.02                       | 1917.85   | 4897.45   | 9389.06   |
| HNSTG <sup>CL</sup> R                                            | 4833        | 6.66  | 4    | 943.4447  | 2      |      | 0         | [6] Carbamidomethyl C                                                                                 | no              | 7.51e+004                     | 1.21e+005 | 5.87e+004 | 8.67e+004 |
| IDSLLNDR                                                         | 142         | 8.49  | 2    | 1073.5498 | 2      |      | 0         |                                                                                                       | yes             | 1.50e+006                     | 4.48e+006 | 3.08e+006 | 1.91e+006 |
| IDSLLNDR                                                         | 2043        | ---   | ---  | 1073.5510 | 3      |      | 0         |                                                                                                       | yes             | 2.20e+004                     | 6.97e+004 | 7.77e+004 | 2.19e+004 |
| IDSLLNDR                                                         | 3602        | ---   | ---  | 1073.5449 | 1      |      | 0         |                                                                                                       | yes             | 2.50e+004                     | 7.76e+004 | 1.08e+005 | 5.04e+004 |
| LKELPGV <sup>CNET</sup> MMALV <sup>EE</sup> CK <sup>PK</sup> CLK | 7176        | 7.07  | 4    | 2967.3754 | 3      |      | 0         | [8] Carbamidomethyl C [12] Oxidation M [13] Oxidation M [19] Carbamidomethyl C [22] Carbamidomethyl C | no              | 1.25e+005                     | 4.09e+005 | 4.96e+004 | 5.47e+005 |
| TLLIETNEER                                                       | 21629       | 7.77  | 2    | 1231.6410 | 3      |      | 0         |                                                                                                       | no              | 891.81                        | 3.50      | 101.28    | 15.12     |
| TLLSNLEEAK                                                       | 1375        | 8.07  | 10   | 1116.5636 | 2      |      | 0         |                                                                                                       | yes             | 3.43e+005                     | 4.91e+005 | 3.43e+005 | 4.01e+005 |
| VTTVASHTSDSDVPSGVTEV <sup>W</sup> VK                             | 6455        | 8.75  | 35   | 2313.1640 | 2      |      | 0         |                                                                                                       | no              | 7.56e+004                     | 3.14e+004 | 3.55e+004 | 1.40e+005 |

Fragment ions for: EILSVD<sup>CS</sup>TNNPSQAK

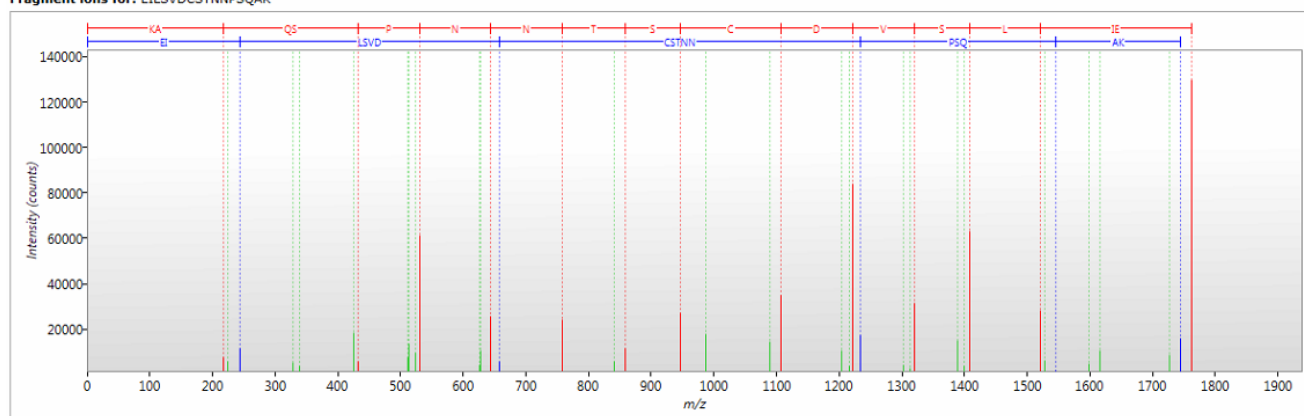

Fragment ions for: IDSLLNDR

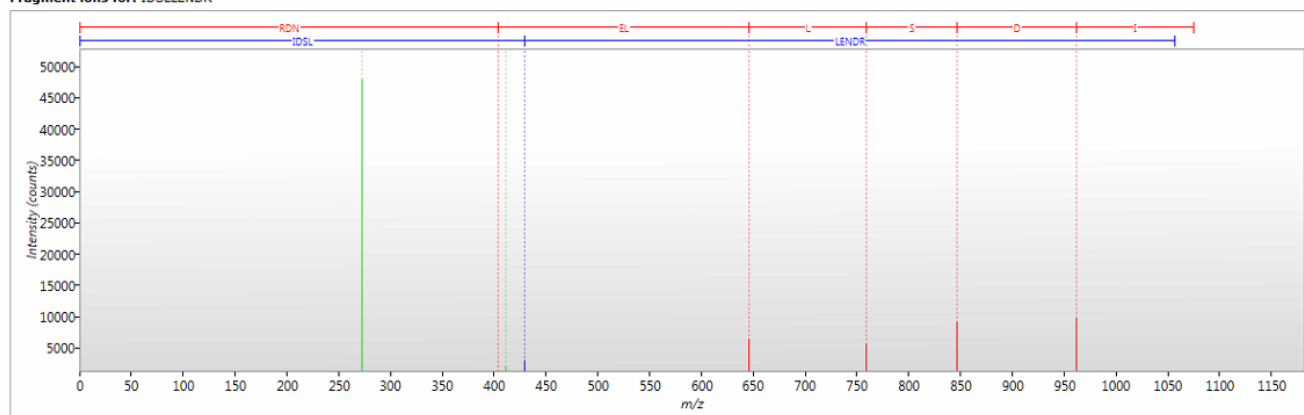

Fragment ions for: TLLSNLEEAK

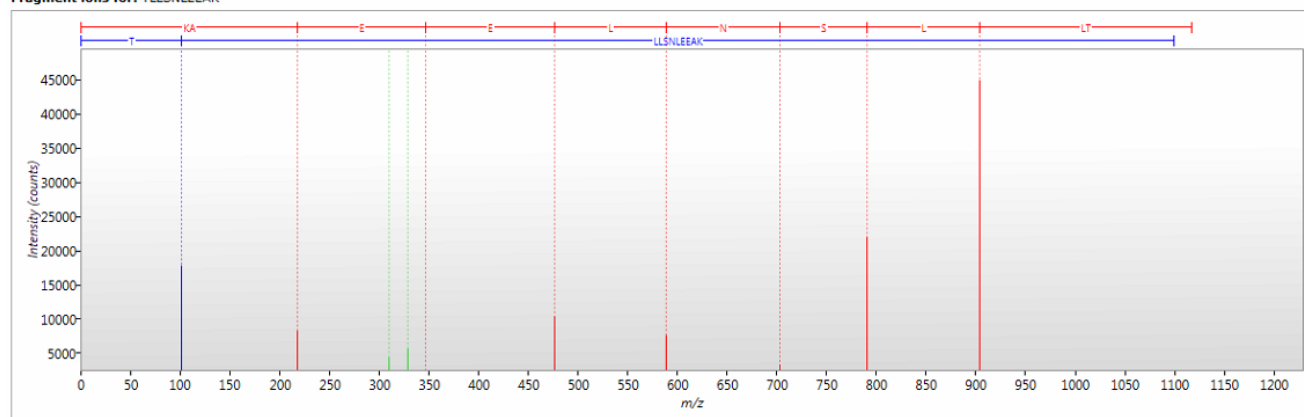

Collagen alpha-1(VI) chain OS=Homo sapiens GN=COL6A1 PE=1 SV=3  
6 peptides

| Sequence                      | Peptide Ion | Score | Hits | Mass      | Charge | Tags | Conflicts | Modifications                                                                           | In quantitation | Average Normalised Abundances |           |           |           |  |
|-------------------------------|-------------|-------|------|-----------|--------|------|-----------|-----------------------------------------------------------------------------------------|-----------------|-------------------------------|-----------|-----------|-----------|--|
|                               |             |       |      |           |        |      |           |                                                                                         |                 | PCa                           | SPH       | Be        | Re        |  |
| GDEGEAGDPGDDNNDIAPR           | 27054       | 5.80  | 2    | 1912.7679 | 2      |      | 0         |                                                                                         | yes             | 3699.88                       | 1426.31   | 514.70    | 2311.34   |  |
| GPPGLR                        | 67          | 6.39  | 3    | 595.3453  | 1      |      | 0         |                                                                                         | yes             | 7.33e+005                     | 2.87e+006 | 2.10e+006 | 1.30e+006 |  |
| GPPGLR                        | 777         | 6.39  | 2    | 595.3451  | 2      |      | 0         |                                                                                         | yes             | 8.69e+004                     | 2.17e+005 | 1.73e+005 | 1.24e+005 |  |
| LLLFSDGNSQGATPAAIEK           | 3617        | 7.87  | 12   | 1930.9723 | 2      |      | 1         |                                                                                         | no              | 3.25e+005                     | 1.92e+005 | 3.01e+005 | 4.02e+005 |  |
| MCSCCECK                      | 11508       | 6.88  | 3    | 1133.3556 | 2      |      | 0         | [2] Carbamidomethyl C [4] Carbamidomethyl C [5] Carbamidomethyl C [7] Carbamidomethyl C | no              | 927.10                        | 306.61    | 40.65     | 3517.94   |  |
| NFTAADVIGQSRDAEEAISQTDITVDMIK | 3111        | 5.62  | 4    | 3224.5192 | 3      |      | 1         |                                                                                         | no              | 1.08e+006                     | 1.38e+006 | 8.32e+005 | 9.63e+005 |  |
| VFSVAITPDHLEPR                | 2155        | 7.97  | 13   | 1579.8392 | 3      |      | 0         |                                                                                         | yes             | 9.86e+004                     | 7.71e+004 | 7.23e+004 | 1.83e+005 |  |

Fragment ions for: GDEGEAGDPGDDNNDIAPR

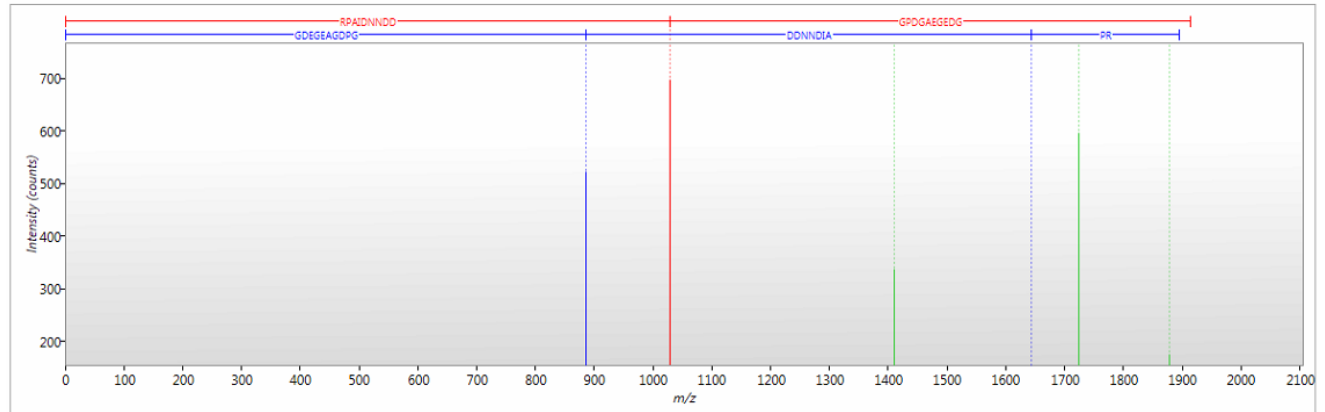

Fragment ions for: GPPGLR

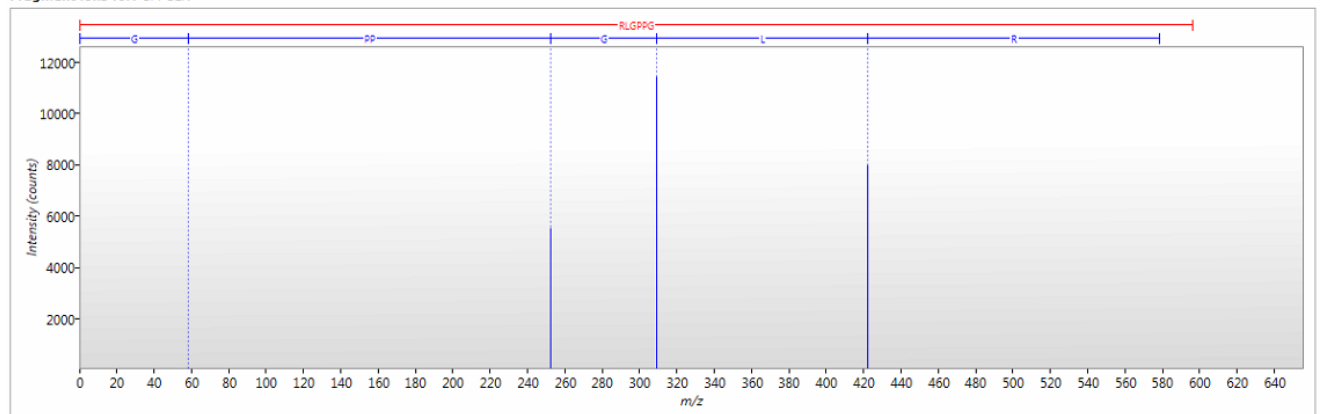

Fragment ions for: VFSVAITPDHLEPR

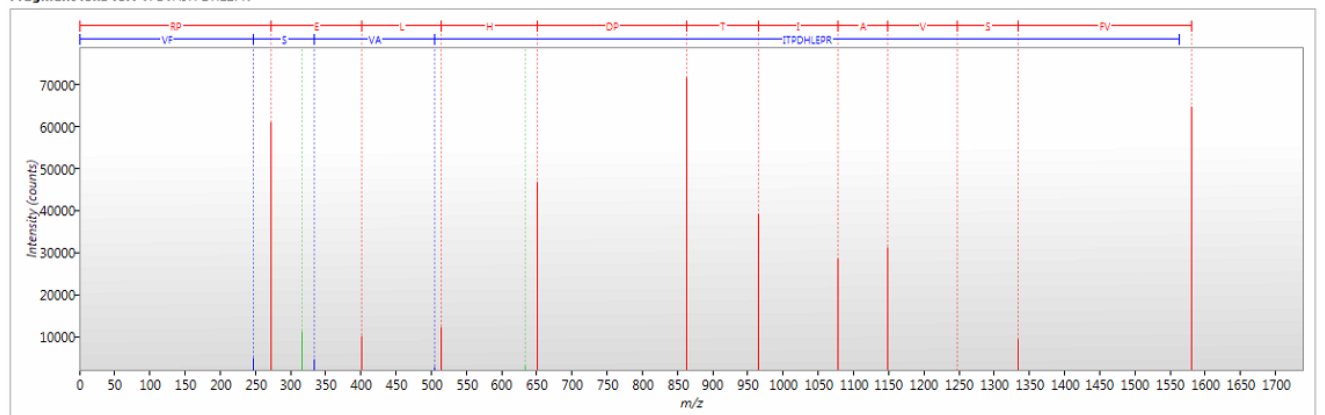

Collagen alpha-1(XVIII) chain OS=Homo sapiens GN=COL18A1 PE=1 SV=5  
2 peptides

| Sequence                                     | Peptide Ion | Score | Hits | Mass      | Charge | Tags | Conflicts | Modifications | In quantitation | Average Normalised Abundances |           |           |           |
|----------------------------------------------|-------------|-------|------|-----------|--------|------|-----------|---------------|-----------------|-------------------------------|-----------|-----------|-----------|
|                                              |             |       |      |           |        |      |           |               |                 | PCa                           | BPH       | Bc        | Rc        |
| GLELEPGAGLFVAQAGGADPKFQGVIAELK               | 5440        | 7.18  | 3    | 3096.6057 | 3      |      | 0         |               | yes             | 2.26e+005                     | 6.18e+004 | 3.72e+004 | 4.69e+005 |
| ISEEVGLLQLLGDPQQVVTQTDDPDVGLAYVFGPDANSQGQVAR | 8701        | 7.21  | 2    | 4605.2769 | 4      |      | 0         |               | yes             | 4.87e+004                     | 4454.71   | 1673.72   | 8.58e+004 |

Fragment ions for: GLELEPGAGLFVAQAGGADPKFQGVIAELK

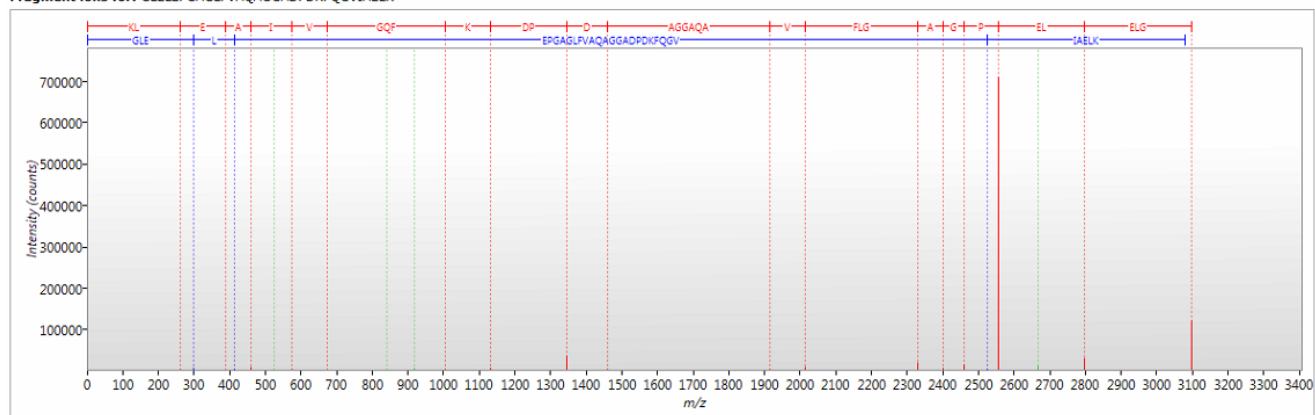

Fragment ions for: ISEEVGLLQLLGDPQQVVTQTDDPDVGLAYVFGPDANSQGQVAR

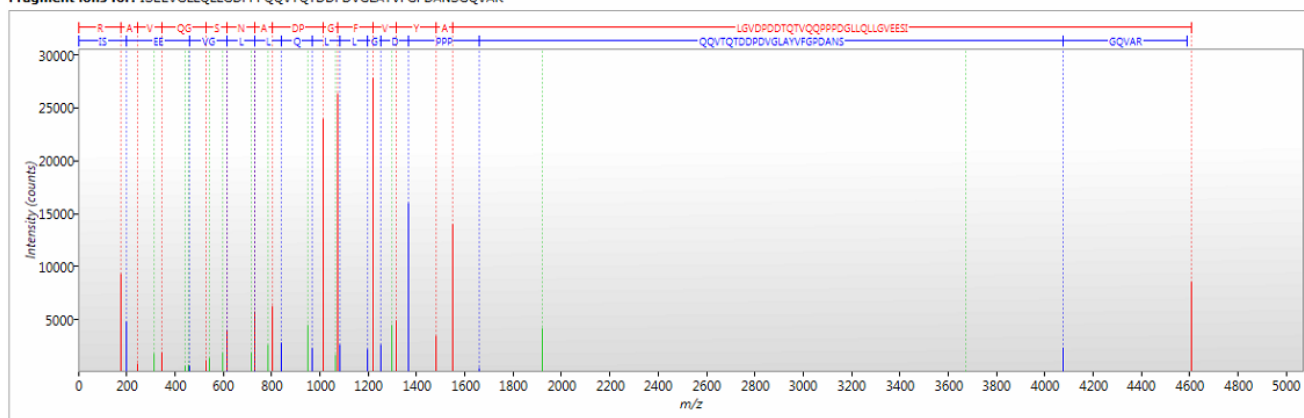

Complement C3 O5=Homo sapiens GN=C3 PE=1 SV=2  
57 peptides

| Sequence                                  | Peptide Ion | Score | Hits | Mass      | Charge | Tags | Conflicts | Modifications                               | In quantitation | Average Normalised Abundances |           |           |           |
|-------------------------------------------|-------------|-------|------|-----------|--------|------|-----------|---------------------------------------------|-----------------|-------------------------------|-----------|-----------|-----------|
|                                           |             |       |      |           |        |      |           |                                             |                 | PCa                           | BPH       | Bc        | Rc        |
| AAVYHHFISDGV                              | 1054        | 7.39  | 2    | 1470.6718 | 2      |      | 0         |                                             | no              | 1.00e+005                     | 4.63e+005 | 1.58e+005 | 2.01e+005 |
| A <sup>2</sup> CEPGVDYVYK                 | 23229       | 8.39  | 8    | 1299.5776 | 1      |      | 0         | [2] Carbamidomethyl C                       | no              | 2263.11                       | 702.30    | 1.34e+004 | 403.57    |
| A <sup>2</sup> CEPGVDYVYK                 | 2075        | 8.39  | 12   | 1299.5845 | 2      |      | 0         | [2] Carbamidomethyl C                       | no              | 2.08e+005                     | 3.60e+005 | 3.24e+005 | 1.36e+005 |
| ADIG <sup>2</sup> CTPGSGK                 | 12236       | 8.51  | 15   | 1061.4852 | 1      |      | 0         | [5] Carbamidomethyl C                       | no              | 5382.78                       | 6817.20   | 1.47e+004 | 5624.23   |
| ADIG <sup>2</sup> CTPGSGK                 | 26271       | 8.92  | 3    | 1061.4981 | 1      |      | 0         | [5] Carbamidomethyl C                       | no              | 3729.79                       | 2061.72   | 8840.33   | 1056.67   |
| ADIG <sup>2</sup> CTPGSGK                 | 1819        | 8.92  | 20   | 1061.5094 | 2      |      | 0         | [5] Carbamidomethyl C                       | no              | 2.42e+005                     | 3.36e+005 | 3.02e+005 | 1.84e+005 |
| AEDLVGK                                   | 2794        | 7.86  | 5    | 730.3692  | 2      |      | 0         |                                             | no              | 3.46e+004                     | 4.39e+004 | 3.32e+004 | 2.63e+004 |
| ASHLGLAR                                  | 7339        | 7.08  | 8    | 823.3427  | 1      |      | 0         |                                             | no              | 8.55e+004                     | 3.47e+004 | 4.55e+004 | 6.13e+004 |
| ASHLGLAR                                  | 22492       | 8.50  | 5    | 823.4525  | 1      |      | 0         |                                             | no              | 145.83                        | 167.71    | 4266.05   | 222.30    |
| AYYENISQQVSTFEYK                          | 3486        | 8.83  | 16   | 2164.9962 | 2      |      | 0         |                                             | no              | 5.19e+004                     | 2.59e+005 | 3.03e+005 | 7.70e+004 |
| A <sup>2</sup> AEEN <sup>2</sup> CFIK     | 1496        | 8.07  | 18   | 1297.5481 | 2      |      | 0         | [1] Carbamidomethyl C [6] Carbamidomethyl C | no              | 7.46e+004                     | 1.52e+005 | 1.05e+005 | 4.06e+004 |
| A <sup>2</sup> AEEN <sup>2</sup> CFIK     | 21137       | 8.07  | 17   | 1297.5408 | 1      |      | 0         | [1] Carbamidomethyl C [6] Carbamidomethyl C | no              | 245.10                        | 65.53     | 5461.23   | 221.13    |
| DFDFVPPVVR                                | 14369       | 7.84  | 7    | 1189.6088 | 1      |      | 0         |                                             | no              | 2.04e+004                     | 1.05e+004 | 2.26e+004 | 1.10e+004 |
| D <sup>2</sup> EEQVNSLPGSITK              | 2695        | 9.16  | 21   | 1788.8524 | 2      |      | 0         | [3] Carbamidomethyl C                       | no              | 2.66e+005                     | 4.13e+005 | 4.23e+005 | 2.40e+005 |
| DTWVEHWPEEDE <sup>2</sup> CQDEENQK        | 14299       | 8.75  | 14   | 2602.0218 | 2      |      | 0         | [13] Carbamidomethyl C                      | no              | 369.72                        | 2.98e+004 | 2.85e+004 | 3289.87   |
| DTWVEHWPEEDE <sup>2</sup> CQDEENQK        | 3195        | 8.75  | 18   | 2602.1485 | 3      |      | 0         | [13] Carbamidomethyl C                      | no              | 2.63e+005                     | 5.05e+005 | 3.32e+005 | 2.65e+005 |
| DYAGVSDAGLTFTSSSGQQTAR                    | 23139       | 7.21  | 4    | 2493.1010 | 2      |      | 0         |                                             | no              | 9353.25                       | 1184.98   | 9452.53   | 2939.02   |
| EALKLEEK                                  | 2848        | 7.68  | 10   | 958.5011  | 2      |      | 0         |                                             | no              | 9.57e+004                     | 1.40e+005 | 1.35e+005 | 9.60e+004 |
| EALKLEEK                                  | 22260       | 7.68  | 8    | 958.5123  | 1      |      | 0         |                                             | no              | 872.20                        | 1711.90   | 5876.29   | 821.42    |
| ENEGFTVTAEGK                              | 4229        | 7.34  | 2    | 1280.5991 | 2      |      | 0         |                                             | no              | 2.09e+005                     | 2.51e+005 | 2.22e+005 | 2.37e+005 |
| ENEGFTVTAEGKGQGTLSVVT <sup>2</sup> MYHAK  | 132         | 6.31  | 2    | 2769.3238 | 3      |      | 0         | [22] Oxidation M                            | yes             | 5.42e+006                     | 1.25e+006 | 1.85e+005 | 7.51e+006 |
| EPGQDLVLLPLSITTD <sup>2</sup> FIPSR       | 7403        | 9.32  | 16   | 2443.2950 | 2      |      | 0         |                                             | no              | 1.45e+004                     | 6.71e+004 | 8.36e+004 | 7650.72   |
| EPGQDLVLLPLSITTD <sup>2</sup> FIPSR       | 10044       | 9.22  | 8    | 2443.2961 | 2      |      | 0         |                                             | no              | 4294.40                       | 1.08e+004 | 9.48e+004 | 2464.64   |
| EVVADSVWVDVK                              | 13998       | ---   | ---  | 1344.7099 | 1      |      | 0         |                                             | yes             | 436.24                        | 116.53    | 2.39e+004 | 30.84     |
| EVVADSVWVDVK                              | 376         | 5.59  | 4    | 1344.6822 | 2      |      | 0         |                                             | yes             | 4.85e+005                     | 1.58e+006 | 2.06e+006 | 4.50e+005 |
| EYVLPSFEVIVEPTK                           | 3732        | 9.27  | 5    | 1877.9616 | 2      |      | 0         |                                             | no              | 6.32e+004                     | 5.21e+004 | 2.33e+005 | 4.14e+004 |
| FISLGEA <sup>2</sup> CK                   | 990         | 8.33  | 19   | 1023.5139 | 2      |      | 0         | [8] Carbamidomethyl C                       | no              | 1.95e+005                     | 4.03e+005 | 2.22e+005 | 1.64e+005 |
| FLTTAK                                    | 3715        | ---   | ---  | 679.3210  | 2      |      | 0         |                                             | no              | 3.50e+004                     | 4.01e+004 | 2.07e+004 | 3.16e+004 |
| FLTTAK                                    | 1617        | 7.43  | 4    | 679.3094  | 1      |      | 0         |                                             | no              | 3.94e+005                     | 3.23e+005 | 3.35e+005 | 3.67e+005 |
| FYHPEKEDGK                                | 4678        | 7.62  | 2    | 1248.5856 | 3      |      | 0         |                                             | no              | 6571.43                       | 7655.15   | 1.46e+004 | 6498.34   |
| FYYIYNEK                                  | 16820       | 8.24  | 10   | 1138.5271 | 1      |      | 0         |                                             | no              | 9619.41                       | 3972.55   | 1.25e+004 | 5521.69   |
| GQGTLSVVTMYHAK                            | 4736        | 5.17  | 2    | 1490.7028 | 2      |      | 0         |                                             | no              | 2.00e+005                     | 1.92e+005 | 1.14e+005 | 1.67e+005 |
| ILLQGTPIVAQMTEDAVDAER                     | 9525        | 9.03  | 2    | 2156.0803 | 3      |      | 0         |                                             | no              | 1510.54                       | 1386.59   | 9.23e+004 | 2399.86   |
| ILLQGTPIVAQMTEDAVDAERLK                   | 7046        | 7.59  | 3    | 2397.2055 | 3      |      | 0         |                                             | no              | 2.52e+005                     | 2.12e+005 | 2.90e+005 | 3.52e+005 |
| ISLPESLK                                  | 3282        | 7.92  | 8    | 885.5116  | 2      |      | 0         |                                             | no              | 5.75e+004                     | 1.17e+005 | 1.10e+005 | 3.79e+004 |
| IWDVVEK                                   | 1093        | 7.88  | 13   | 887.4759  | 2      |      | 0         |                                             | no              | 8.31e+004                     | 2.13e+005 | 2.10e+005 | 7.06e+004 |
| KQELSEAEQATR                              | 3117        | 8.51  | 22   | 1388.6509 | 2      |      | 0         |                                             | no              | 1.80e+005                     | 2.01e+005 | 2.11e+005 | 1.66e+005 |
| KVLLDG <sup>2</sup> VQNP                  | 5976        | 7.18  | 2    | 1237.6135 | 3      |      | 0         |                                             | no              | 1.14e+004                     | 1.56e+004 | 4.80e+004 | 1.16e+004 |
| L <sup>2</sup> CRDEL <sup>2</sup> CR      | 11136       | 6.95  | 4    | 1120.5147 | 3      |      | 0         | [2] Carbamidomethyl C [7] Carbamidomethyl C | no              | 4547.84                       | 6158.24   | 1797.00   | 1347.70   |
| LMNIFLK                                   | 5510        | 8.03  | 3    | 877.5089  | 2      |      | 0         |                                             | no              | 1586.40                       | 7259.74   | 1.81e+004 | 2815.48   |
| LPYSVVR                                   | 435         | 8.08  | 3    | 832.3271  | 1      |      | 0         |                                             | no              | 5.81e+005                     | 5.68e+005 | 5.53e+005 | 5.90e+005 |
| LVAYYITLIGASQGR                           | 12615       | 8.24  | 11   | 1510.9001 | 3      |      | 0         |                                             | no              | 2.33e+004                     | 4.09e+004 | 1.09e+004 | 1.20e+004 |
| NTWILEI <sup>2</sup> CTR                  | 32337       | 7.80  | 4    | 1249.5955 | 1      |      | 0         | [8] Carbamidomethyl C                       | no              | 3250.82                       | 275.66    | 6679.33   | 2882.33   |
| QDSLSSQNLGLVPLSWDIPELV <sup>2</sup> MGQWK | 16508       | 7.34  | 5    | 3297.6236 | 3      |      | 0         | [25] Oxidation M                            | no              | 2093.24                       | 2.57e+004 | 1.27e+004 | 4245.89   |

|                                      |       |      |    |           |   |   |                                               |     |           |           |           |           |
|--------------------------------------|-------|------|----|-----------|---|---|-----------------------------------------------|-----|-----------|-----------|-----------|-----------|
| QGALELIK                             | 8478  | 7.97 | 6  | 870.5048  | 1 | 0 |                                               | no  | 6822.77   | 1.06e+004 | 1.81e+004 | 5642.67   |
| QGALELIK                             | 2381  | 7.97 | 7  | 870.4782  | 2 | 0 |                                               | no  | 8.81e+004 | 1.27e+005 | 7.87e+004 | 8.81e+004 |
| QKPDGVFQEDAPVHQE <sup>18</sup> IGGLR | 3425  | 6.21 | 2  | 2579.2966 | 3 | 0 | [18] Oxidation M                              | yes | 1.57e+006 | 5.23e+005 | 2.85e+005 | 8.02e+005 |
| QVREPGQDLVVLPLSITTDPIPSFR            | 25694 | 8.11 | 6  | 2826.5242 | 3 | 0 |                                               | no  | 5360.94   | 3219.16   | 1.93e+004 | 1617.50   |
| SDDKVTLEER                           | 4966  | 7.56 | 2  | 1190.4161 | 2 | 0 |                                               | no  | 3.64e+004 | 3.11e+004 | 4.79e+004 | 3.80e+004 |
| SDDKVTLEER                           | 4627  | 8.26 | 18 | 1190.5777 | 3 | 0 |                                               | no  | 5.56e+004 | 1.03e+005 | 5.83e+004 | 4.54e+004 |
| SGIPVITSPYQIHFTK                     | 2097  | 8.95 | 22 | 1786.9619 | 3 | 0 |                                               | no  | 2.41e+005 | 4.14e+005 | 2.04e+005 | 1.28e+005 |
| SGQSEDRQVPVPGQQMTLK                  | 15449 | 7.97 | 13 | 1984.9255 | 2 | 0 |                                               | no  | 7766.89   | 1.48e+004 | 2.98e+004 | 8789.05   |
| SGSDEVQVGGQR                         | 29356 | 8.57 | 22 | 1288.5991 | 1 | 0 |                                               | no  | 1689.48   | 2566.39   | 7107.69   | 368.79    |
| SNLDEDIAEENIVSR                      | 2669  | 9.21 | 20 | 1815.8837 | 2 | 0 |                                               | no  | 4.73e+005 | 5.84e+005 | 4.19e+005 | 4.94e+005 |
| SNLDEDIAEENIVSRSEPPESWLWNVEDLK       | 11194 | 6.28 | 4  | 3675.5742 | 3 | 0 |                                               | no  | 4.35e+005 | 1.07e+005 | 1.77e+005 | 1.27e+005 |
| SSLSPYIVIVPLK                        | 42222 | 8.93 | 6  | 1400.8237 | 1 | 0 |                                               | no  | 19.77     | 0.00      | 1805.09   | 1.64      |
| TELRPGETLVNVELLR                     | 2171  | 8.57 | 6  | 1871.0219 | 3 | 0 |                                               | no  | 1.45e+005 | 1.82e+005 | 1.92e+005 | 1.38e+005 |
| TFISPIK                              | 2521  | 8.26 | 23 | 804.4666  | 2 | 0 |                                               | no  | 5.14e+004 | 1.02e+005 | 7.25e+004 | 5.93e+004 |
| TGLQEVVK                             | 1428  | 8.24 | 15 | 1001.5355 | 2 | 0 |                                               | no  | 2.49e+005 | 4.81e+005 | 3.67e+005 | 2.86e+005 |
| TGLQEVVK                             | 20706 | 7.70 | 9  | 1001.5253 | 1 | 0 |                                               | no  | 1372.96   | 3497.63   | 2018.21   | 1146.75   |
| TIYTPGSTVLVR                         | 28024 | 8.91 | 12 | 1369.7248 | 1 | 0 |                                               | no  | 54.58     | 211.94    | 5721.02   | 112.55    |
| TLDPER                               | 3026  | 7.44 | 2  | 729.3369  | 1 | 0 |                                               | no  | 1.05e+005 | 8.90e+004 | 1.26e+005 | 8.11e+004 |
| TMQALPYSTVGNSNNYLHLSVLR              | 8253  | 7.28 | 5  | 2577.2864 | 3 | 0 |                                               | no  | 5.39e+004 | 1.14e+005 | 3.08e+004 | 6.36e+004 |
| TMQALPYSTVGNSNNYLHLSVLR              | 14122 | 8.22 | 6  | 2577.1258 | 2 | 0 |                                               | no  | 6875.11   | 8763.10   | 2.81e+004 | 1.39e+004 |
| VFLDC <sup>5</sup> NYTELRL           | 1596  | 9.10 | 18 | 1701.7858 | 2 | 0 | [5] Carbamidomethyl C   [6] Carbamidomethyl C | no  | 5.89e+005 | 5.85e+005 | 5.82e+005 | 4.12e+005 |
| VHQYFNVELIQPGAIVK                    | 8988  | 9.14 | 9  | 1840.8846 | 2 | 0 |                                               | no  | 6.72e+004 | 9.18e+004 | 1.22e+005 | 4.45e+004 |
| VHQYFNVELIQPGAIVK                    | 7824  | 7.77 | 3  | 1840.9197 | 3 | 0 |                                               | no  | 3.64e+004 | 1.62e+005 | 5.52e+004 | 4.66e+004 |
| VLLDGVQNPRL                          | 2238  | 8.23 | 13 | 1109.5916 | 2 | 0 |                                               | no  | 1.38e+005 | 1.83e+005 | 1.97e+005 | 1.08e+005 |
| VLLDGVQNPRL                          | 32669 | 8.23 | 10 | 1109.5973 | 1 | 0 |                                               | no  | 648.26    | 1315.82   | 3549.55   | 459.40    |
| VQLSNDFDEYIMAEQTIK                   | 11629 | 9.12 | 15 | 2256.0959 | 2 | 0 |                                               | no  | 2.70e+004 | 4.44e+004 | 7.00e+004 | 1.93e+004 |
| VTIKPAPETEKRPQDAK                    | 20668 | 6.82 | 5  | 1907.0749 | 3 | 0 |                                               | no  | 2444.10   | 1.67e+004 | 2173.76   | 985.12    |
| VVLVAVDK                             | 10461 | 8.59 | 15 | 841.5103  | 1 | 0 |                                               | no  | 1049.06   | 3533.92   | 2.28e+004 | 1706.13   |
| VVPEGIR                              | 4638  | 8.34 | 3  | 768.4349  | 2 | 0 |                                               | no  | 2.81e+004 | 2.49e+004 | 2.74e+004 | 1.95e+004 |

Fragment ions for: ENEGFTVTAEGKGQGLSVVTMYHAK

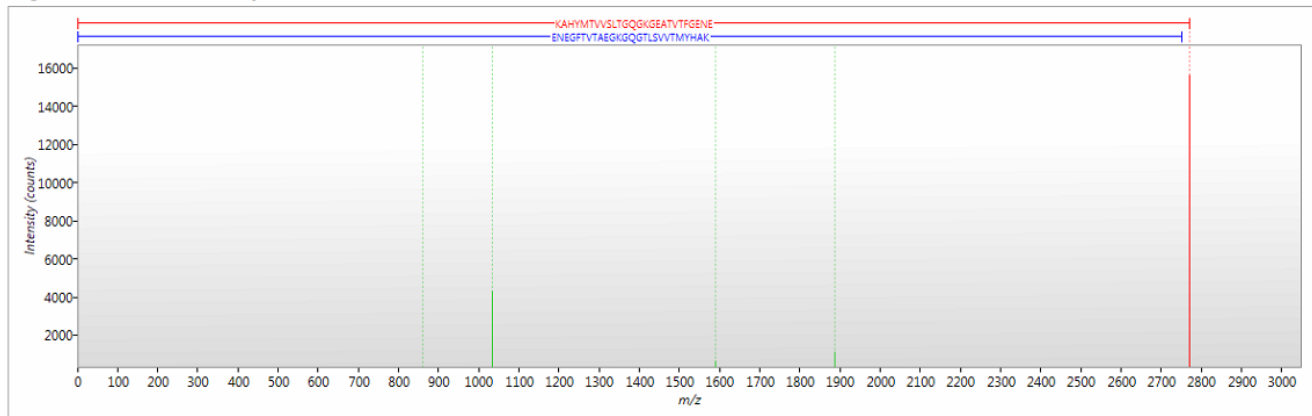

Fragment ions for: DICEEQVNSLPGSITK

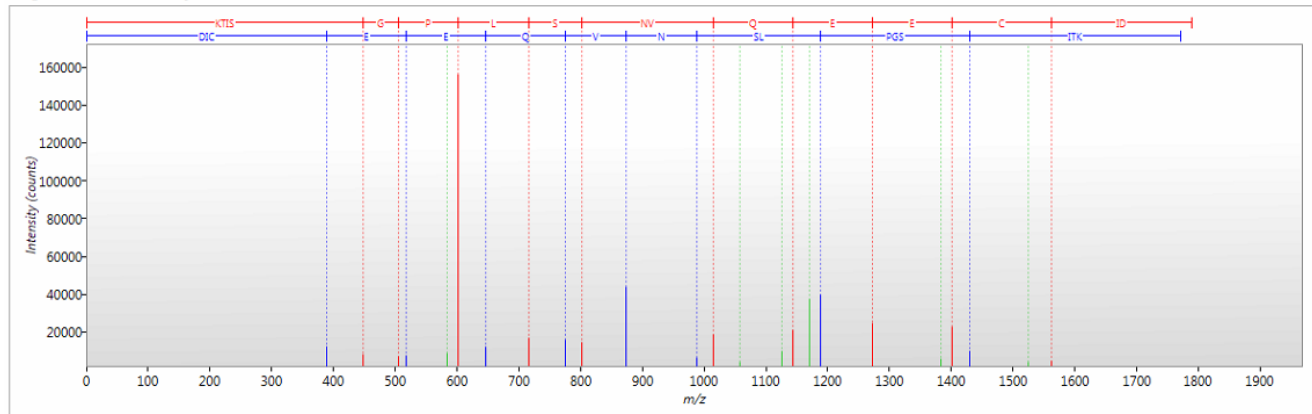

Fragment ions for: EPGQDLVVLLPSITTFIPSR

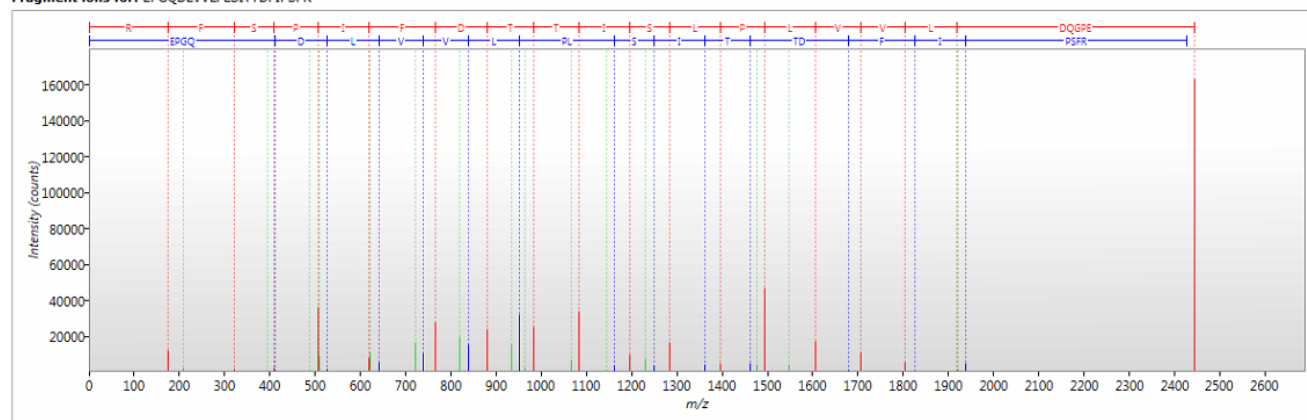

Fragment ions for: EYVLPSEFVIVEPTEK

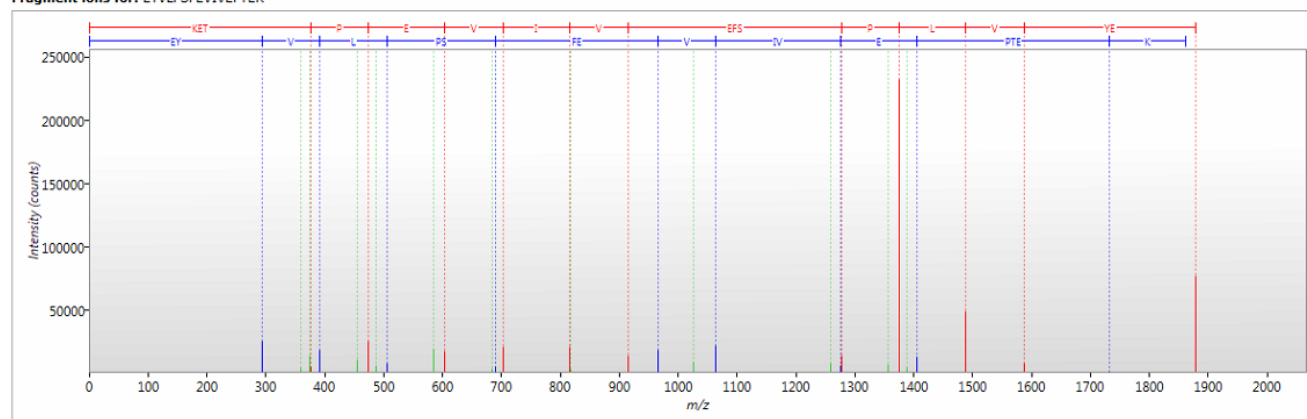

Fragment ions for: QKPDGVFQEDAPVIHQEMIGGLR

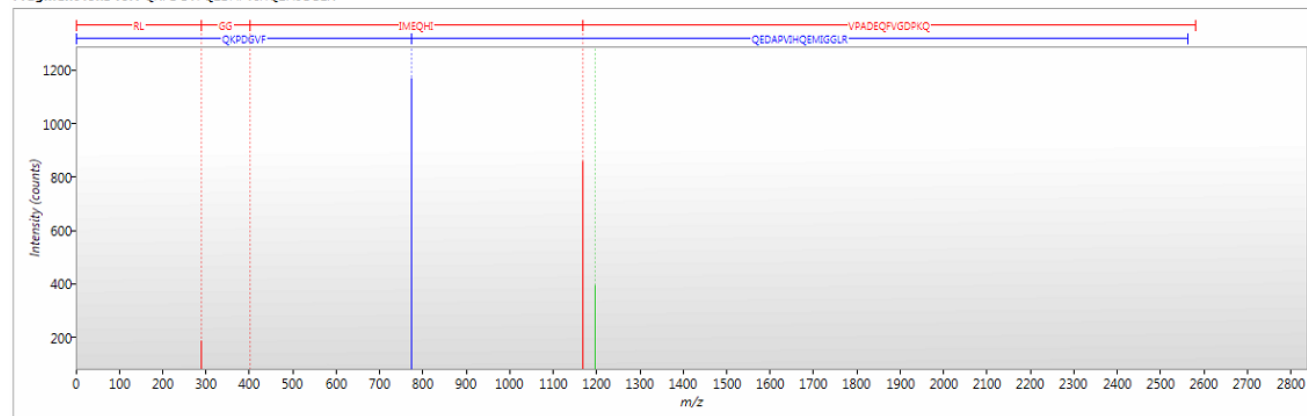

Deoxyribonuclease-1 OS=Homo sapiens GN=DNASE1 PE=1 SV=1  
3 peptides

| Sequence                                   | Peptide Ion | Score | Hits | Mass      | Charge | Tags | Conflicts | Modifications          | In quantitation | Average Normalised Abundances |           |           |           |
|--------------------------------------------|-------------|-------|------|-----------|--------|------|-----------|------------------------|-----------------|-------------------------------|-----------|-----------|-----------|
|                                            |             |       |      |           |        |      |           |                        |                 | PCa                           | BPH       | Bc        | Bc        |
| IAAFNIQTFGETK                              | 10667       | 7.17  | 3    | 1438.7837 | 3      |      | 0         |                        | yes             | 1379.25                       | 7420.64   | 3645.24   | 2.84e+004 |
| LLDNLNQDAPDTYHYVVEPLGR                     | 1234        | 8.17  | 18   | 2628.2673 | 3      |      | 0         |                        | yes             | 7.03e+005                     | 2.72e+005 | 1.97e+005 | 7.71e+005 |
| LVWTSPTFQWLIPDSADTTATPTH <sup>C</sup> AYDR | 7771        | 8.27  | 10   | 3250.5177 | 3      |      | 0         | [24] Carbamidomethyl C | yes             | 1.49e+005                     | 8.81e+004 | 3.51e+004 | 3.45e+005 |

Fragment ions for: IAAFNITQTFGETK

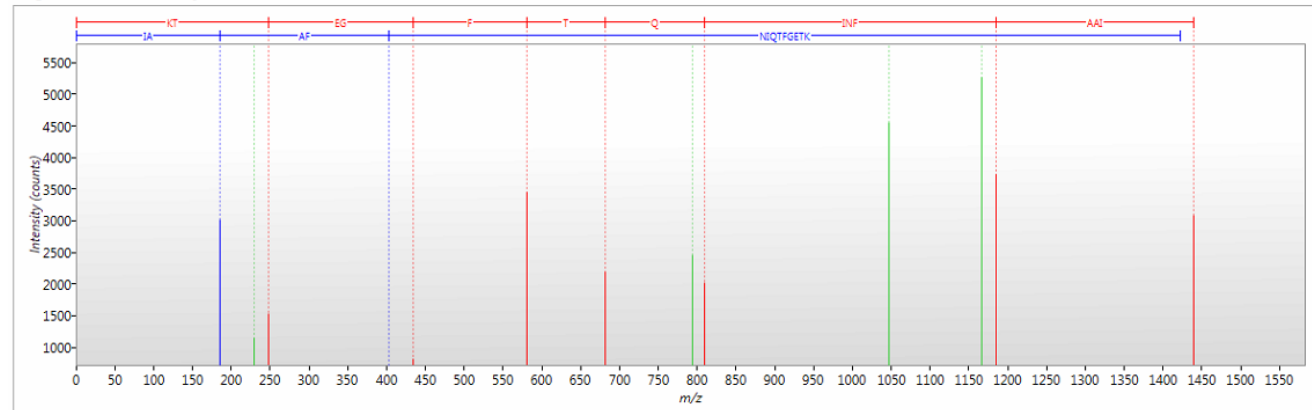

Fragment ions for: LLDNLNQDAPDTYHYVVEPLGR

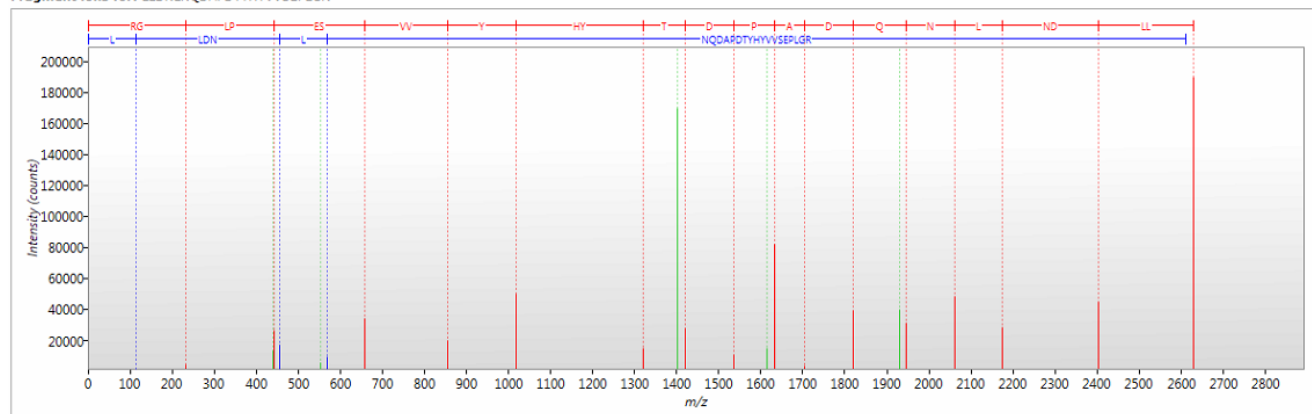

Fragment ions for: LVWTSPTFQWLIPDSADTTATPTHAYDR

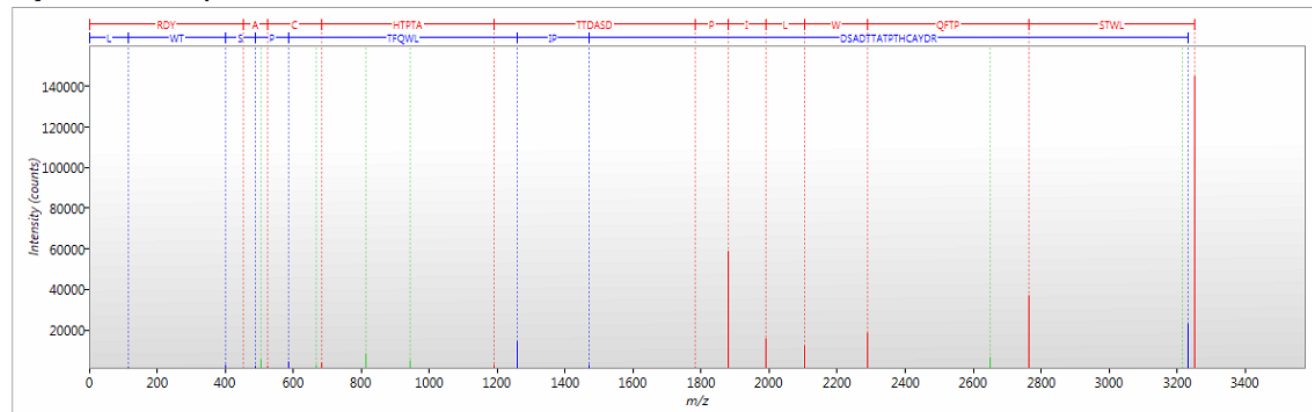



Endonuclease domain-containing 1 protein OS=Homo sapiens GN=ENDOD1 PE=1 SV=2  
3 peptides

| Sequence                          | Peptide Ion | Score | Hits | Mass      | Charge | Tags | Conflicts | Modifications | In quantitation | Average Normalised Abundances |           |           |           |
|-----------------------------------|-------------|-------|------|-----------|--------|------|-----------|---------------|-----------------|-------------------------------|-----------|-----------|-----------|
|                                   |             |       |      |           |        |      |           |               |                 | PCa                           | BPH       | Bc        | Rc        |
| ILEVNNQIQDEER                     | 4000        | 8.04  | 12   | 1583.8087 | 2      |      | 0         |               | yes             | 1.01e+005                     | 5.47e+004 | 8.11e+004 | 9.50e+004 |
| QALNTDYLDSDYQR                    | 6468        | 8.26  | 17   | 1700.7903 | 2      |      | 0         |               | yes             | 9.96e+004                     | 5.80e+004 | 4.14e+004 | 8.25e+004 |
| WLVEPQIDDPNSNLEEAEINEAEITSVNSLGSK | 7639        | 8.21  | 7    | 3581.7292 | 3      |      | 0         |               | yes             | 1.71e+005                     | 2.12e+004 | 2606.47   | 7.35e+004 |

Fragment ions for: ILEVNNQIQDEER

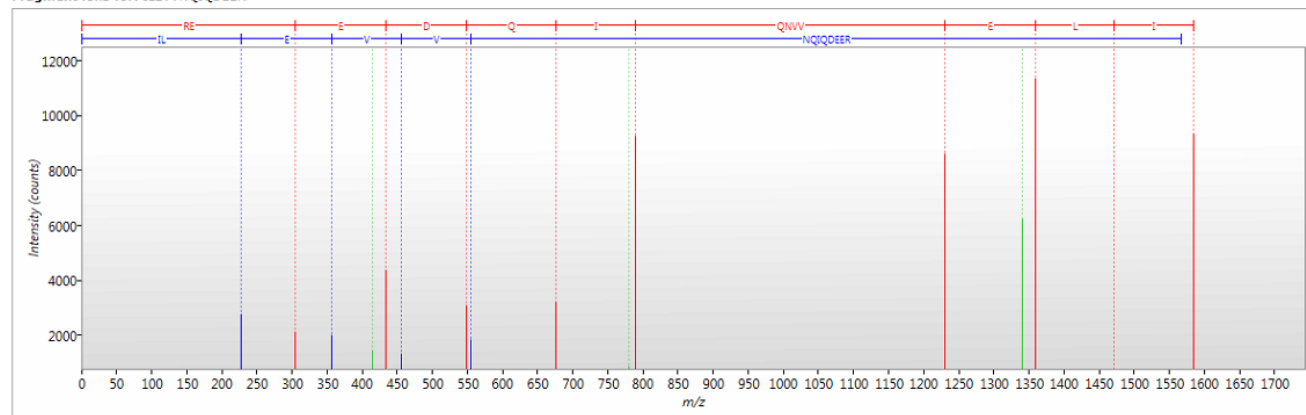

Fragment ions for: QALNTDYLDSDYQR

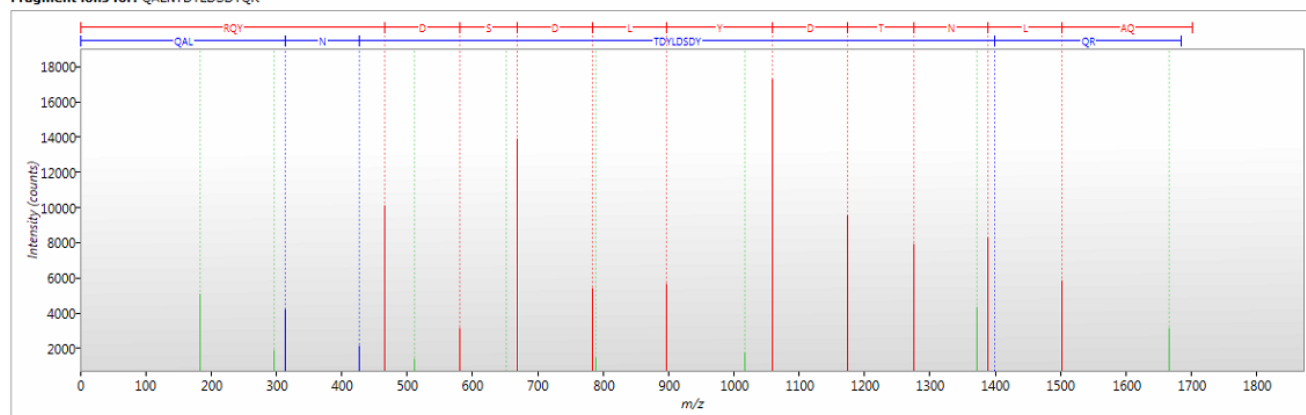

Fragment ions for: WLVEPQIDDPNSNLEEAEINEAEITSVNSLGSK

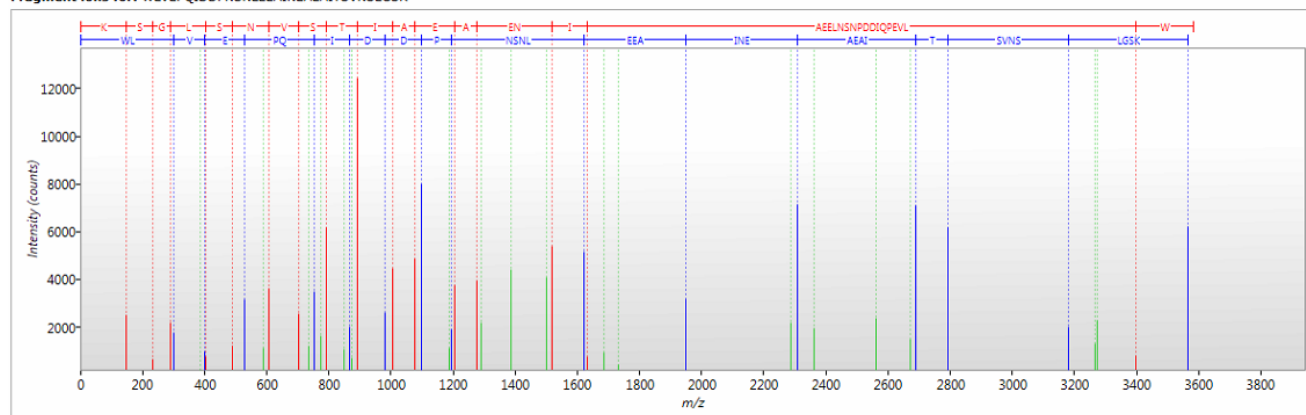

Fibrinogen beta chain OS=Homo sapiens GN=FGB PE=1 SV=2  
24 peptides

| Sequence                            | Peptide Ion | Score | Hits | Mass      | Charge | Tags | Conflicts | Modifications                                                       | In quantitation | Average Normalised Abundances |           |           |           |      |
|-------------------------------------|-------------|-------|------|-----------|--------|------|-----------|---------------------------------------------------------------------|-----------------|-------------------------------|-----------|-----------|-----------|------|
|                                     |             |       |      |           |        |      |           |                                                                     |                 | PCA                           | SPH       | DS        | RS        |      |
| AHYGGFTVQIEANK                      | 26759       | ---   | ---  | 1534.7131 | 1      |      | 0         |                                                                     | no              | 0.00                          | 0.00      | 6736.81   |           | 5.67 |
| AHYGGFTVQIEANK                      | 6345        | 9.11  | 9    | 1534.7004 | 2      |      | 0         |                                                                     | no              | 1.60e+005                     | 3.12e+005 | 1.91e+005 | 1.82e+005 |      |
| AHYGGFTVQIEANK                      | 5298        | 8.45  | 6    | 1534.7356 | 3      |      | 0         |                                                                     | no              | 8.09e+004                     | 1.72e+005 | 4.90e+004 | 3.71e+004 |      |
| AHYGGFTVQIEANK                      | 2963        | 9.39  | 9    | 1534.7014 | 2      |      | 0         |                                                                     | no              | 5.57e+004                     | 6.02e+004 | 3.91e+005 | 6.27e+004 |      |
| AHYGGFTVQIEANK                      | 2609        | 9.39  | 9    | 1534.7267 | 3      |      | 0         |                                                                     | no              | 3.55e+004                     | 7.45e+004 | 1.68e+005 | 3.76e+004 |      |
| DNDGWLTSDFR                         | 23995       | 8.56  | 9    | 1274.5567 | 1      |      | 0         |                                                                     | no              | 846.34                        | 229.50    | 7127.18   | 3503.90   |      |
| DNEHVNEYSSSELEK                     | 40786       | 9.65  | 8    | 1767.7655 | 1      |      | 0         |                                                                     | no              | 0.00                          | 0.00      | 5031.72   | 0.00      |      |
| EDGGGWYYNR                          | 25203       | 8.98  | 3    | 1238.5151 | 1      |      | 0         |                                                                     | no              | 3089.72                       | 409.98    | 7879.93   | 677.43    |      |
| EDGGGWYYNR                          | 19106       | 9.24  | 17   | 1238.5177 | 1      |      | 0         |                                                                     | no              | 5616.09                       | 7282.33   | 1.91e+004 | 3633.92   |      |
| EDGGGWYYNR                          | 1331        | 9.24  | 13   | 1238.5206 | 2      |      | 0         |                                                                     | no              | 1.04e+005                     | 1.55e+005 | 4.08e+005 | 6.40e+004 |      |
| EDGGGWYYNR                          | 1203        | 9.16  | 10   | 1238.5543 | 2      |      | 0         |                                                                     | no              | 2.03e+005                     | 5.41e+005 | 4.24e+005 | 1.95e+005 |      |
| EDGGGWYYNRCHAAHPNGR                 | 6398        | 6.48  | 2    | 2215.9327 | 2      |      | 0         | [11] Carbamidomethyl C                                              | no              | 2.29e+004                     | 6.69e+004 | 1.42e+005 | 2.02e+004 |      |
| GHRPLDK                             | 52290       | 8.53  | 3    | 821.4456  | 1      |      | 0         |                                                                     | no              | 282.75                        | 59.63     | 1343.78   | 335.40    |      |
| GHRPLDKK                            | 12564       | 7.26  | 2    | 949.5454  | 3      |      | 0         |                                                                     | no              | 793.45                        | 2995.09   | 1.06e+004 | 2156.56   |      |
| GSWYSRRK                            | 1650        | 6.34  | 2    | 1029.4818 | 3      |      | 0         | [6] Oxidation M                                                     | no              | 6.13e+004                     | 1.22e+005 | 7.45e+004 | 5.89e+004 |      |
| GSWYSRRK                            | 3738        | 6.78  | 2    | 1029.4780 | 2      |      | 0         | [6] Oxidation M                                                     | no              | 1.56e+005                     | 1.68e+005 | 1.45e+005 | 1.43e+005 |      |
| HGTDGVTVMNHWK                       | 7733        | 8.81  | 9    | 1543.7877 | 3      |      | 0         |                                                                     | no              | 1.03e+004                     | 5.67e+004 | 4.59e+004 | 2.70e+004 |      |
| IRPFFPQQ                            | 928         | 8.91  | 18   | 1031.5651 | 2      |      | 0         |                                                                     | no              | 2.02e+005                     | 9.36e+005 | 6.08e+005 | 2.84e+005 |      |
| KAPDAGGCLHADPDLGVLCPTGQQLQALLQERPIR | 8536        | 8.22  | 3    | 4083.0109 | 5      |      | 0         | [8] Carbamidomethyl C [19] Carbamidomethyl C [23] Carbamidomethyl C | no              | 1.35e+005                     | 1.22e+005 | 5.83e+004 | 1.64e+004 |      |
| KAPDAGGCLHADPDLGVLCPTGQQLQALLQERPIR | 7897        | 8.75  | 5    | 4083.0729 | 4      |      | 0         | [8] Carbamidomethyl C [19] Carbamidomethyl C [23] Carbamidomethyl C | no              | 5.10e+004                     | 1.18e+005 | 7.21e+005 | 7.75e+004 |      |
| KAPDAGGCLHADPDLGVLCPTGQQLQALLQERPIR | 5255        | 8.71  | 4    | 4083.0132 | 5      |      | 0         | [8] Carbamidomethyl C [19] Carbamidomethyl C [23] Carbamidomethyl C | no              | 1.39e+005                     | 1.02e+005 | 9.74e+005 | 9.98e+004 |      |
| KWDPIK                              | 2637        | 7.80  | 2    | 835.4123  | 2      |      | 0         |                                                                     | no              | 2.83e+005                     | 4.43e+005 | 3.36e+005 | 2.45e+005 |      |
| LESQVSAQMEYCR                       | 531         | ---   | ---  | 1602.8212 | 4      |      | 0         | [9] Oxidation M [12] Carbamidomethyl C                              | yes             | 1.80e+006                     | 2.81e+006 | 4.22e+005 | 8.34e+005 |      |
| LESQVSAQMEYCR                       | 1387        | 8.06  | 2    | 1602.8075 | 2      |      | 0         | [9] Oxidation M [12] Carbamidomethyl C                              | yes             | 1.34e+006                     | 1.39e+006 | 3.43e+005 | 9.67e+005 |      |
| LESQVSAQMEYCR                       | 185         | ---   | ---  | 1602.8120 | 3      |      | 0         | [9] Oxidation M [12] Carbamidomethyl C                              | yes             | 6.02e+006                     | 9.79e+006 | 1.44e+006 | 3.70e+006 |      |
| NYCGLPGEYWLGNLNDK                   | 605         | 9.74  | 25   | 1784.8154 | 2      |      | 0         | [3] Carbamidomethyl C                                               | yes             | 8.15e+005                     | 1.48e+006 | 1.41e+006 | 6.87e+005 |      |
| NYCGLPGEYWLGNLNDK                   | 35896       | 9.74  | 7    | 1784.7651 | 1      |      | 0         | [3] Carbamidomethyl C                                               | no              | 0.00                          | 0.00      | 3837.26   | 0.00      |      |
| NYCGLPGEYWLGNLNDKISQLTR             | 36967       | 7.64  | 3    | 2483.1826 | 2      |      | 0         | [3] Carbamidomethyl C                                               | no              | 1.03e+004                     | 120.58    | 235.66    | 873.22    |      |
| NYCGLPGEYWLGNLNDKISQLTR             | 42747       | 7.78  | 3    | 2483.1518 | 2      |      | 0         | [3] Carbamidomethyl C                                               | no              | 3292.94                       | 511.01    | 3560.50   | 721.47    |      |
| QCSKEDGGGWYYNR                      | 4075        | 6.44  | 2    | 1741.8186 | 3      |      | 0         | [2] Carbamidomethyl C                                               | no              | 6.65e+004                     | 2.51e+005 | 1.03e+005 | 1.35e+005 |      |
| QDGSVDFGR                           | 764         | 8.92  | 19   | 979.4432  | 2      |      | 0         |                                                                     | no              | 2.08e+005                     | 5.42e+005 | 4.23e+005 | 1.16e+005 |      |
| QDGFHIVATNTDGG                      | 401         | 9.14  | 22   | 1307.6124 | 2      |      | 0         |                                                                     | no              | 3.76e+005                     | 8.56e+005 | 6.99e+005 | 2.79e+005 |      |
| QDGFHIVATNTDGG                      | 12333       | 9.14  | 17   | 1307.6038 | 1      |      | 0         |                                                                     | no              | 1411.14                       | 2772.24   | 2.00e+004 | 3442.53   |      |
| QDGFHIVATNTDGGNYCGLPGEYWLGNLNDK     | 8604        | 5.67  | 2    | 3074.4099 | 4      |      | 0         | [16] Carbamidomethyl C                                              | no              | 4131.41                       | 4.18e+005 | 3.92e+004 | 4.09e+004 |      |
| QVKDNEHVNEYSSSELEK                  | 925         | ---   | ---  | 2123.0597 | 4      |      | 0         |                                                                     | yes             | 1.04e+005                     | 1.57e+005 | 1.17e+006 | 1.09e+005 |      |
| QVKDNEHVNEYSSSELEK                  | 1278        | 8.41  | 6    | 2123.0448 | 3      |      | 0         |                                                                     | yes             | 2.77e+005                     | 6.30e+005 | 1.47e+006 | 1.82e+005 |      |
| SILENLR                             | 5026        | 8.68  | 9    | 843.4667  | 1      |      | 0         |                                                                     | no              | 1.42e+004                     | 1.50e+004 | 4.68e+004 | 5.71e+004 |      |
| TPCTVSCNIPVYSGK                     | 595         | 9.67  | 24   | 1617.7759 | 2      |      | 0         | [3] Carbamidomethyl C [7] Carbamidomethyl C                         | no              | 5.83e+005                     | 1.03e+006 | 1.29e+006 | 4.64e+005 |      |
| TPCTVSCNIPVYSGK                     | 31868       | 9.67  | 9    | 1617.7821 | 1      |      | 0         | [3] Carbamidomethyl C [7] Carbamidomethyl C                         | no              | 68.51                         | 0.00      | 5080.40   | 235.96    |      |
| TPCTVSCNIPVYSGKCEEIIR               | 27982       | 9.49  | 12   | 2547.2042 | 2      |      | 0         | [3] Carbamidomethyl C [7] Carbamidomethyl C [17] Carbamidomethyl C  | no              | 7513.94                       | 373.97    | 6324.94   | 601.46    |      |
| TPCTVSCNIPVYSGKCEEIIR               | 2291        | 9.49  | 15   | 2547.2173 | 3      |      | 0         | [3] Carbamidomethyl C [7] Carbamidomethyl C [17] Carbamidomethyl C  | no              | 4.91e+005                     | 3.66e+005 | 2.42e+005 | 1.71e+005 |      |
| YQISVHK                             | 631         | 8.60  | 15   | 850.4506  | 2      |      | 0         |                                                                     | no              | 5.22e+004                     | 3.12e+005 | 1.84e+005 | 4.10e+004 |      |

#### Fragment ions for: LESQVSAQMEYCR

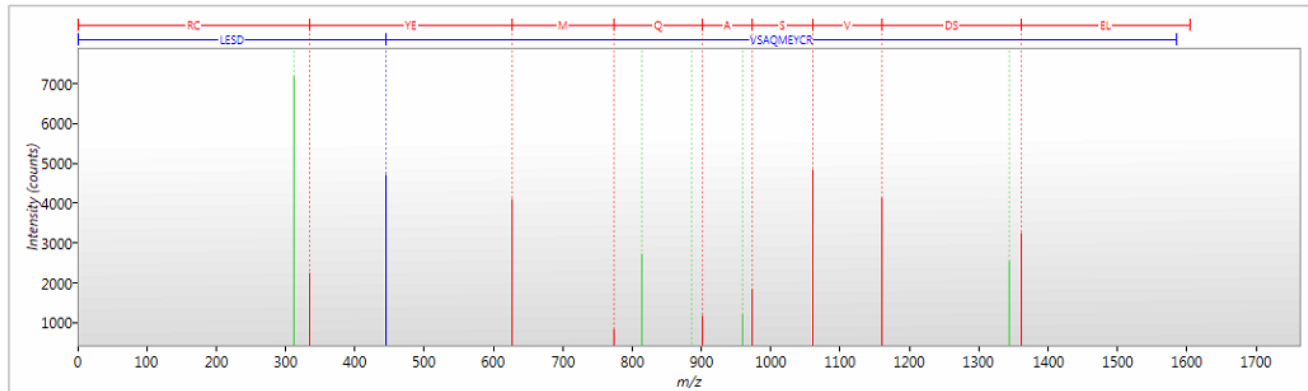

#### Fragment ions for: NYCGLPGEYWLGNLNDK

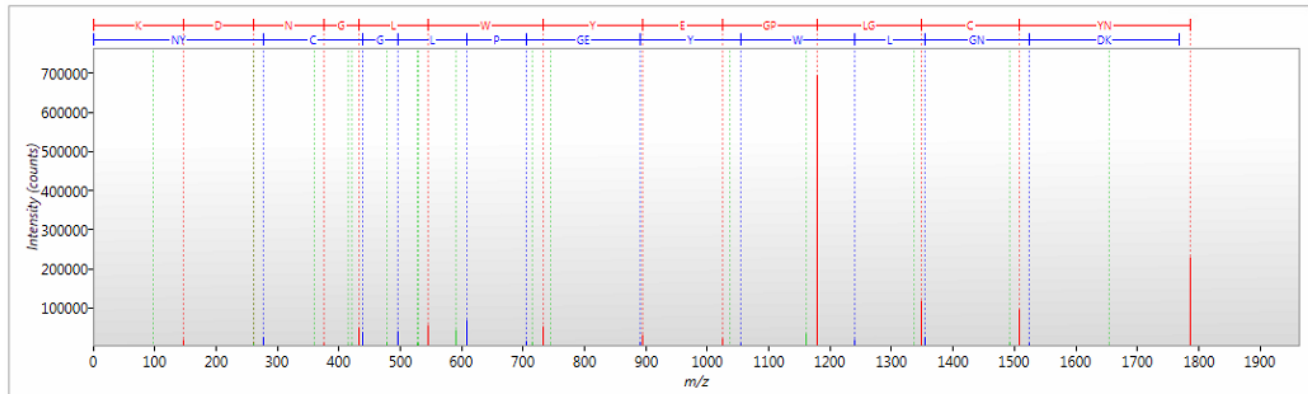

# Fragment ions for: QVKDNENVVNEYSSLEK

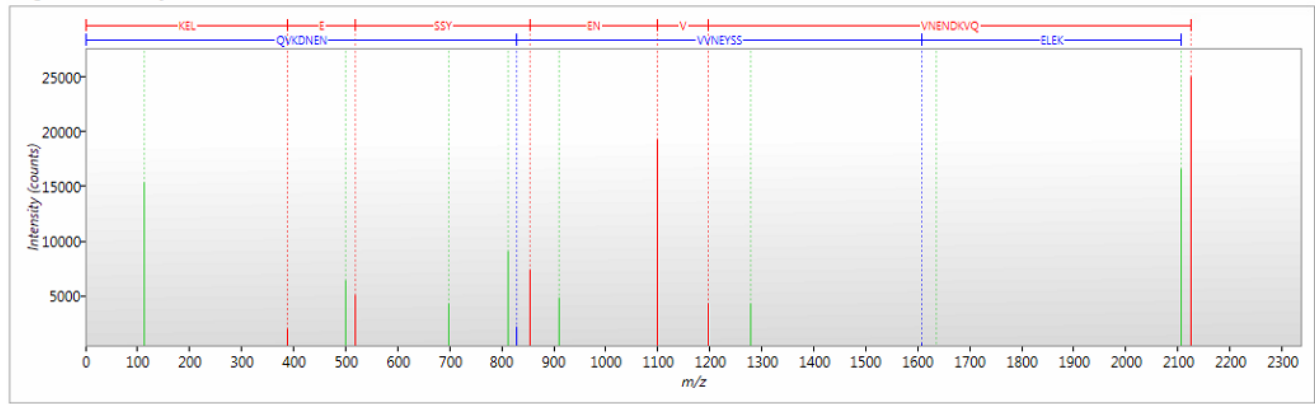

## P02679

Fibrinogen gamma chain O5=Homo sapiens GN=FGG PE=1 SV=3  
20 peptides

| Sequence                       | Peptide Ion | Score | Hits | Mass      | Charge | Tags | Conflicts | Modifications                                                       | In quantitation | Average Normalised Abundances |           |           |           |
|--------------------------------|-------------|-------|------|-----------|--------|------|-----------|---------------------------------------------------------------------|-----------------|-------------------------------|-----------|-----------|-----------|
|                                |             |       |      |           |        |      |           |                                                                     |                 | FCa                           | GFH       | Le        | ILc       |
| AIQLTYNPDESSKPHMIDAAATLK       | 27009       | 8.97  | 10   | 2519.2055 | 2      |      | 0         |                                                                     | no              | 3757.99                       | 8057.03   | 2.56e+004 | 1093.73   |
| AIQLTYNPDESSKPHMIDAAATLK       | 14222       | 8.74  | 11   | 2535.2477 | 2      |      | 0         | [16] Oxidation M                                                    | no              | 1460.36                       | 7973.94   | 3.81e+004 | 3319.80   |
| ASTPNGYDNGIIVATWK              | 2447        | 8.79  | 13   | 1892.9153 | 2      |      | 0         |                                                                     | no              | 3.27e+005                     | 2.49e+005 | 3.40e+005 | 3.72e+005 |
| DCQDIANK                       | 303         | 9.44  | 18   | 962.4164  | 2      |      | 0         | [2] Carbamidomethyl C                                               | no              | 9.54e+004                     | 3.58e+005 | 5.86e+005 | 8.10e+004 |
| DCQDIANK                       | 4698        | 9.44  | 18   | 962.4138  | 1      |      | 0         | [2] Carbamidomethyl C                                               | no              | 2.05e+004                     | 2.18e+004 | 5.69e+004 | 1.93e+004 |
| DNCCILDER                      | 457         | 9.40  | 23   | 1193.4988 | 2      |      | 0         | [3] Carbamidomethyl C [4] Carbamidomethyl C                         | yes             | 7.19e+005                     | 1.05e+006 | 1.21e+006 | 5.77e+005 |
| EGFGHLSPTGTTFWLGNEK            | 587         | 9.50  | 11   | 2206.0559 | 3      |      | 0         |                                                                     | no              | 5.91e+005                     | 3.55e+005 | 1.94e+006 | 5.32e+005 |
| EGFGHLSPTGTTFWLGNEK            | 1708        | 9.19  | 11   | 2206.0540 | 3      |      | 0         |                                                                     | no              | 3.42e+005                     | 1.64e+006 | 4.47e+005 | 3.50e+005 |
| FGSVCPPTCGIADFLSTYQTK          | 2135        | 9.45  | 16   | 2416.0723 | 2      |      | 0         | [5] Carbamidomethyl C [9] Carbamidomethyl C                         | no              | 5.30e+004                     | 4.90e+005 | 2.51e+005 | 1.98e+004 |
| FGSVCPPTCGIADFLSTYQTK          | 2689        | 9.91  | 5    | 2416.0720 | 2      |      | 0         | [5] Carbamidomethyl C [9] Carbamidomethyl C                         | no              | 2.24e+004                     | 6491.52   | 4.93e+005 | 1.78e+004 |
| FGSVCPPTCGIADFLSTYQTK          | 1325        | 9.64  | 17   | 2416.1137 | 3      |      | 0         | [5] Carbamidomethyl C [9] Carbamidomethyl C                         | no              | 1.63e+005                     | 7.71e+005 | 5.05e+005 | 9.22e+004 |
| FGSVCPPTCGIADFLSTYQTK          | 1942        | 9.91  | 5    | 2416.1202 | 3      |      | 0         | [5] Carbamidomethyl C [9] Carbamidomethyl C                         | no              | 4.25e+004                     | 7.42e+004 | 5.82e+005 | 5.68e+004 |
| IHLISTQSAIPYALR                | 6095        | 9.42  | 9    | 1681.9505 | 3      |      | 0         |                                                                     | no              | 2774.25                       | 1.21e+004 | 5.71e+004 | 3741.69   |
| LTYAYFAGGDAGDAFGDFGDDPSDK      | 18948       | 8.99  | 8    | 2833.1673 | 2      |      | 0         |                                                                     | no              | 946.28                        | 5949.98   | 1.81e+004 | 80.38     |
| LTYAYFAGGDAGDAFGDFGDDPSDK      | 20348       | 9.04  | 6    | 2833.1678 | 2      |      | 0         |                                                                     | no              | 1185.79                       | 45.13     | 2.61e+004 | 0.00      |
| NWIQYK                         | 2895        | 8.19  | 5    | 850.4384  | 2      |      | 0         |                                                                     | no              | 4.18e+004                     | 1.12e+005 | 5.82e+004 | 4.38e+004 |
| QSGLYFIKPLK                    | 3910        | 8.39  | 8    | 1292.7426 | 3      |      | 0         |                                                                     | no              | 7.99e+004                     | 2.15e+005 | 6.14e+004 | 7.75e+004 |
| RLDGSVDFK                      | 1145        | 8.42  | 13   | 1035.5264 | 2      |      | 0         |                                                                     | no              | 2.43e+005                     | 3.77e+005 | 4.84e+005 | 2.18e+005 |
| RLDGSVDFK                      | 18355       | 8.42  | 10   | 1035.4927 | 1      |      | 0         |                                                                     | no              | 1.97e+004                     | 7872.94   | 2.50e+004 | 1.73e+004 |
| TSTADYAMFK                     | 826         | 8.97  | 9    | 1133.5248 | 2      |      | 0         |                                                                     | yes             | 1.46e+006                     | 2.14e+006 | 1.20e+006 | 1.30e+006 |
| TSTADYAMFK                     | 27323       | 7.95  | 4    | 1149.5020 | 1      |      | 0         | [8] Oxidation M                                                     | no              | 1409.49                       | 1738.35   | 4734.46   | 349.00    |
| VAQLEAQCEPCK                   | 5012        | 8.72  | 4    | 1559.6897 | 2      |      | 0         | [8] Carbamidomethyl C [12] Carbamidomethyl C                        | no              | 2.91e+004                     | 6.25e+004 | 6.35e+004 | 3.25e+004 |
| VAQLEAQCEPCK                   | 55189       | 8.72  | 2    | 1559.6946 | 1      |      | 0         | [8] Carbamidomethyl C [12] Carbamidomethyl C                        | no              | 0.00                          | 12.43     | 422.33    | 0.00      |
| VAQLEAQCEPCKDVTQIHDTGK         | 21287       | ---   | ---  | 2767.3241 | 2      |      | 0         | [8] Carbamidomethyl C [12] Carbamidomethyl C                        | no              | 2028.62                       | 1051.60   | 1.79e+004 | 9.35      |
| VAQLEAQCEPCKDVTQIHDTGK         | 16917       | ---   | ---  | 2767.3236 | 2      |      | 0         | [8] Carbamidomethyl C [12] Carbamidomethyl C                        | no              | 47.40                         | 188.18    | 3.69e+004 | 6.84      |
| VAQLEAQCEPCKDVTQIHDTGK         | 3479        | 9.45  | 5    | 2767.3063 | 3      |      | 0         | [8] Carbamidomethyl C [12] Carbamidomethyl C                        | no              | 3.16e+004                     | 1.25e+004 | 3.15e+005 | 1.65e+004 |
| VAQLEAQCEPCKDVTQIHDTGK         | 3420        | 9.53  | 16   | 2767.3048 | 3      |      | 0         | [8] Carbamidomethyl C [12] Carbamidomethyl C                        | no              | 1.39e+005                     | 7.36e+005 | 4.93e+005 | 1.12e+005 |
| VAQLEAQCEPCKDVTQIHDTGK         | 863         | 9.53  | 22   | 2767.3296 | 4      |      | 0         | [8] Carbamidomethyl C [12] Carbamidomethyl C                        | yes             | 3.31e+005                     | 1.89e+006 | 2.18e+006 | 3.12e+005 |
| VAQLEAQCEPCKDVTQIHDTGKDCQDIANK | 5155        | 7.86  | 7    | 3711.7830 | 5      |      | 0         | [8] Carbamidomethyl C [12] Carbamidomethyl C [26] Carbamidomethyl C | no              | 2.51e+005                     | 2.43e+005 | 5.54e+004 | 8.91e+004 |
| VGPEADKYR                      | 4682        | 8.26  | 9    | 1033.5211 | 3      |      | 0         |                                                                     | no              | 1.41e+004                     | 3.57e+004 | 3.61e+004 | 9128.42   |
| VGPEADKYR                      | 758         | 8.45  | 13   | 1033.5178 | 2      |      | 0         |                                                                     | no              | 8.27e+004                     | 2.46e+005 | 2.91e+005 | 4.17e+004 |
| YEASILTHDSSIR                  | 1298        | 9.10  | 5    | 1490.7410 | 3      |      | 0         |                                                                     | no              | 3.81e+004                     | 4.46e+004 | 3.64e+005 | 1.99e+004 |
| YEASILTHDSSIR                  | 1083        | 8.93  | 5    | 1490.7375 | 3      |      | 0         |                                                                     | no              | 4.09e+004                     | 5.62e+004 | 2.17e+005 | 2.99e+004 |
| YEASILTHDSSIR                  | 3519        | 8.93  | 5    | 1490.7156 | 2      |      | 0         |                                                                     | no              | 3.30e+004                     | 3.61e+004 | 1.28e+005 | 3.65e+004 |
| YEASILTHDSSIR                  | 3591        | 9.10  | 5    | 1490.7150 | 2      |      | 0         |                                                                     | no              | 7.10e+004                     | 5.18e+004 | 1.83e+005 | 4.04e+004 |
| YLQEIYNSNNQK                   | 14027       | 9.65  | 12   | 1512.7190 | 1      |      | 0         |                                                                     | no              | 1420.01                       | 718.99    | 2.87e+004 | 572.71    |
| YLQEIYNSNNQK                   | 610         | 9.65  | 24   | 1512.7213 | 2      |      | 0         |                                                                     | no              | 3.81e+005                     | 1.07e+006 | 1.28e+006 | 2.56e+005 |

# Fragment ions for: DNCCILDER

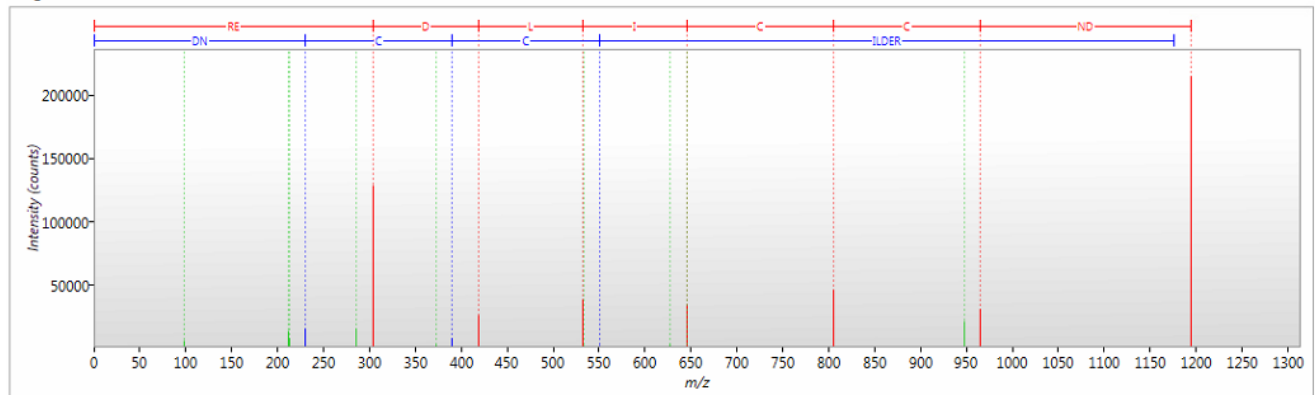

Fragment ions for: TSTADYAMFK

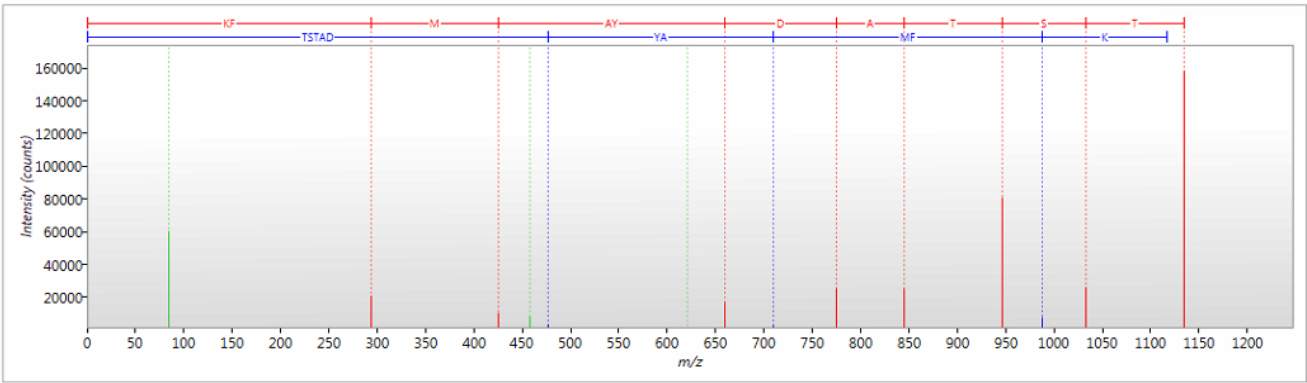

Fragment ions for: VAQLEAQCQEPCKDVTQIHDITGK

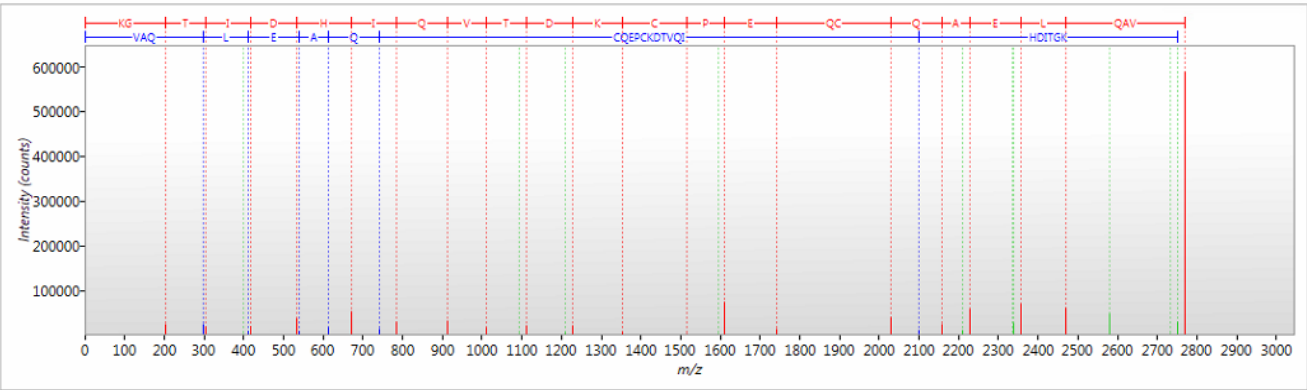

P28799

Granulins O5=Homo sapiens GN=GRN PE=1 SV=2  
2 peptides

| Sequence           | Peptide Ion | Score | Hits | Mass      | Charge | Tags | Conflicts | Modifications                                                                             | In quantitation | Average Normalised Abundances |           |           |           |  |
|--------------------|-------------|-------|------|-----------|--------|------|-----------|-------------------------------------------------------------------------------------------|-----------------|-------------------------------|-----------|-----------|-----------|--|
|                    |             |       |      |           |        |      |           |                                                                                           |                 | PCa                           | BDH       | Bc        | Rc        |  |
| HCCPAGFR           | 632         | 6.29  | 4    | 1003.5125 | 2      |      | 0         | [2] Carbamidomethyl C [3] Carbamidomethyl C                                               | yes             | 5.23e+005                     | 6.00e+005 | 4.37e+005 | 5.97e+005 |  |
| HCCPAGFR           | 7225        | 6.29  | 4    | 1003.5157 | 1      |      | 0         | [2] Carbamidomethyl C [3] Carbamidomethyl C                                               | yes             | 2.88e+004                     | 3.28e+004 | 2.83e+004 | 3.03e+004 |  |
| QGVVACCPYRQGVCCADR | 618         | 5.55  | 2    | 2142.8618 | 3      |      | 0         | [5] Carbamidomethyl C [6] Carbamidomethyl C [13] Carbamidomethyl C [14] Carbamidomethyl C | yes             | 8.91e+005                     | 5.02e+006 | 2.40e+006 | 1.55e+006 |  |

Fragment ions for: HCCPAGFR

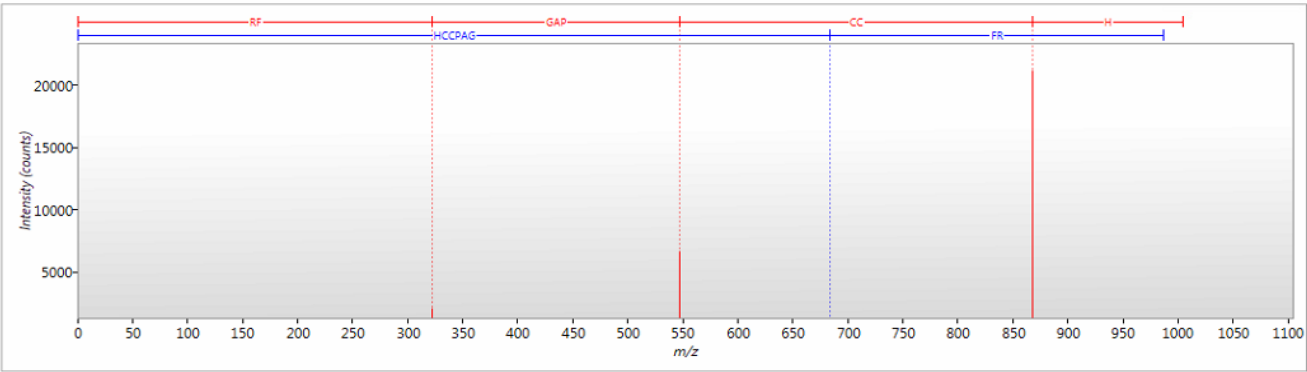

Fragment ions for: CEEEDSTALVCDNGSLGK

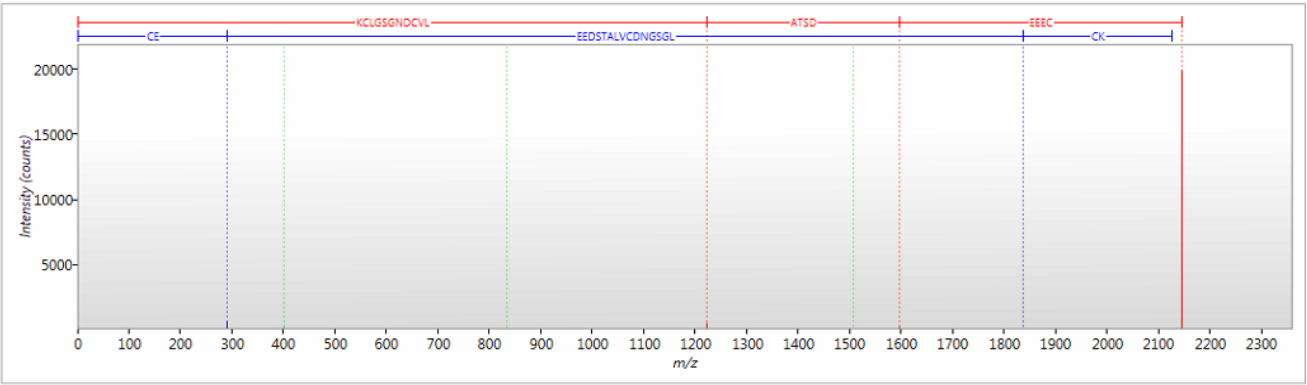

Hemoglobin subunit beta OS=Homo sapiens GN=HBB PE=1 SV=2  
10 peptides

| Sequence            | Peptide Ion | Score | Hits | Mass      | Charge | Tags | Conflicts | Modifications          | In quantitation | Average Normalised Abundances |           |           |           |
|---------------------|-------------|-------|------|-----------|--------|------|-----------|------------------------|-----------------|-------------------------------|-----------|-----------|-----------|
|                     |             |       |      |           |        |      |           |                        |                 | PCa                           | BPH       | Bc        | Rc        |
| EFTPPVQAAYQK        | 994         | 6.84  | 4    | 1377.6885 | 2      |      | 0         |                        | no              | 1.29e+005                     | 2.95e+005 | 1.99e+005 | 1.08e+005 |
| EFTPPVQAAYQK        | 13938       | 6.63  | 3    | 1377.6704 | 1      |      | 0         |                        | no              | 2775.17                       | 3851.68   | 1.10e+004 | 1410.74   |
| FFESFGDLSTPDAVMGNPK | 158         | 10.32 | 15   | 2058.1039 | 3      |      | 0         |                        | yes             | 1.56e+006                     | 5.92e+006 | 4.88e+006 | 3.67e+006 |
| FFESFGDLSTPDAVMGNPK | 316         | 10.32 | 16   | 2057.9433 | 2      |      | 0         |                        | yes             | 3.49e+005                     | 9.33e+005 | 4.79e+006 | 2.49e+005 |
| FFESFGDLSTPDAVMGNPK | 1251        | ---   | ---  | 2058.1276 | 2      |      | 0         |                        | yes             | 6.45e+005                     | 2.01e+006 | 1.19e+006 | 7.58e+005 |
| FFESFGDLSTPDAVMGNPK | 3168        | 9.82  | 5    | 2074.0015 | 3      |      | 0         | [15] Oxidation M       | no              | 3.20e+005                     | 4.97e+005 | 2.09e+005 | 4.56e+005 |
| FFESFGDLSTPDAVMGNPK | 1824        | 9.82  | 12   | 2073.9398 | 2      |      | 0         | [15] Oxidation M       | no              | 1.19e+005                     | 2.48e+005 | 7.77e+005 | 1.40e+005 |
| FFESFGDLSTPDAVMGNPK | 1400        | 9.98  | 9    | 2073.9406 | 2      |      | 0         | [15] Oxidation M       | no              | 1.40e+005                     | 1.10e+005 | 8.78e+005 | 1.22e+005 |
| GTFATLSELHCDK       | 15686       | 9.35  | 4    | 1477.7172 | 3      |      | 0         | [11] Carbamidomethyl C | no              | 3826.31                       | 1.68e+004 | 2.35e+004 | 5117.50   |
| GTFATLSELHCDK       | 1302        | 9.35  | 5    | 1477.7077 | 2      |      | 0         | [11] Carbamidomethyl C | no              | 6.21e+005                     | 8.82e+005 | 6.79e+005 | 6.44e+005 |
| MVHLTPEEKSAVTALVVGK | 6367        | 6.82  | 2    | 1996.0066 | 3      |      | 0         |                        | no              | 8.20e+004                     | 2.45e+005 | 1.68e+005 | 6.77e+004 |
| SAVTALVVGK          | 1700        | 9.87  | 18   | 931.4917  | 1      |      | 0         |                        | no              | 2.19e+005                     | 2.36e+005 | 1.16e+006 | 2.28e+005 |
| SAVTALVVGK          | 4318        | 9.80  | 4    | 931.4826  | 1      |      | 0         |                        | no              | 9.51e+004                     | 7.01e+004 | 1.24e+005 | 9.37e+004 |
| VHLTPEEK            | 2846        | 9.43  | 10   | 951.4995  | 1      |      | 0         |                        | no              | 5870.63                       | 1.11e+004 | 8.32e+004 | 4551.35   |
| VHLTPEEK            | 256         | 9.71  | 5    | 951.5011  | 2      |      | 0         |                        | no              | 1.29e+005                     | 4.39e+005 | 2.10e+006 | 1.19e+005 |
| VHLTPEEK            | 157         | 9.43  | 10   | 951.5030  | 2      |      | 0         |                        | no              | 5.35e+004                     | 1.96e+005 | 6.55e+005 | 5.29e+004 |
| VLGAFSDGLAHLNLIK    | 673         | 9.94  | 13   | 1668.8576 | 3      |      | 0         |                        | yes             | 2.33e+005                     | 6.89e+005 | 2.02e+006 | 2.82e+005 |
| VNVDEVGGEALGR       | 3072        | 10.08 | 24   | 1313.6576 | 1      |      | 0         |                        | no              | 4611.70                       | 3.43e+004 | 6.77e+005 | 6027.29   |
| VVAGVANALAHK        | 6849        | 9.76  | 3    | 1148.6674 | 3      |      | 0         |                        | no              | 6779.42                       | 5238.83   | 6.02e+004 | 4646.51   |

Fragment ions for: FFESFGDLSTPDAVMGNPK

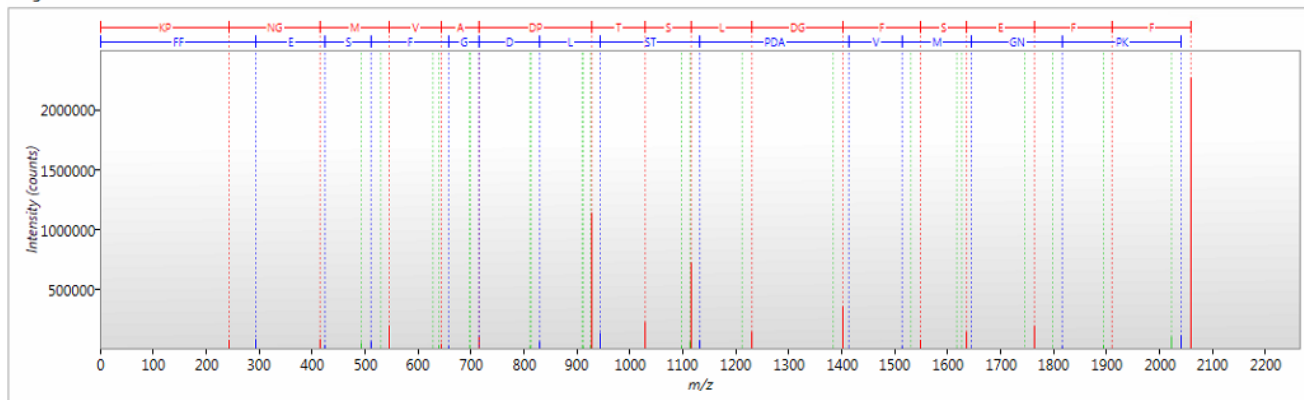

Fragment ions for: VLGAFSDGLAHLNLIK

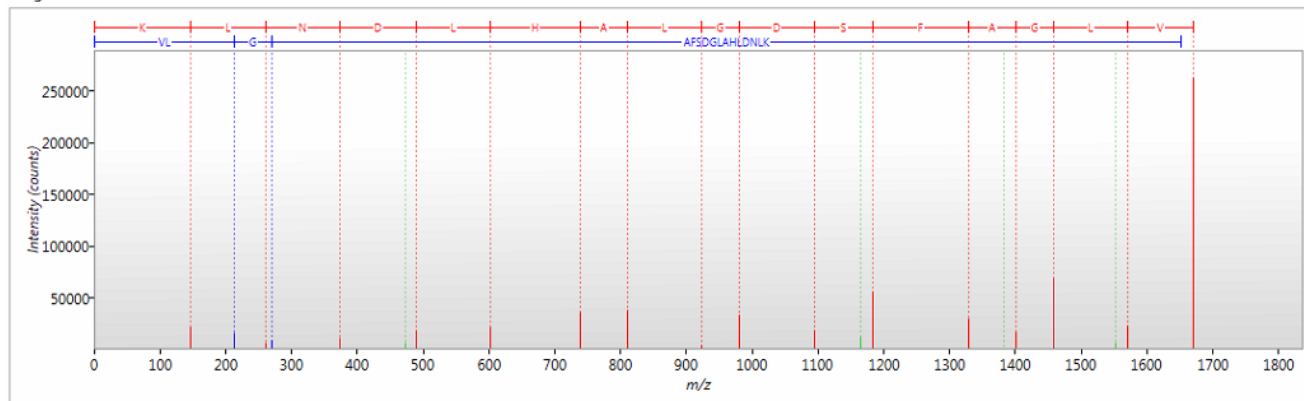

Hemopexin OS=Homo sapiens GN=HPX PE=1 SV=2  
16 peptides

| Sequence                                                                       | Peptide Ion | Score | Hits | Mass      | Charge | Tags | Conflicts | Modifications                                                                       | In quantitation | Average Normalised Abundances |           |           |           |
|--------------------------------------------------------------------------------|-------------|-------|------|-----------|--------|------|-----------|-------------------------------------------------------------------------------------|-----------------|-------------------------------|-----------|-----------|-----------|
|                                                                                |             |       |      |           |        |      |           |                                                                                     |                 | PcA                           | BpH       | Bc        | Rc        |
| DYFMP <sup>C</sup> GR                                                          | 3126        | 8.50  | 14   | 1141.4899 | 2      |      | 0         | [6] Carbamidomethyl C                                                               | no              | 1.30e+005                     | 1.83e+005 | 9.31e+004 | 1.74e+005 |
| ELISER                                                                         | 2354        | 7.83  | 5    | 745.3325  | 1      |      | 0         |                                                                                     | no              | 8.67e+004                     | 1.27e+005 | 1.09e+005 | 8.58e+004 |
| EVGTPHGILDSVDAAFI <sup>C</sup> PGSSR                                           | 1106        | 9.39  | 32   | 2497.2348 | 3      |      | 0         | [19] Carbamidomethyl C                                                              | no              | 3.89e+005                     | 9.97e+005 | 7.23e+005 | 4.25e+005 |
| EVGTPHGILDSVDAAFI <sup>C</sup> PGSSR                                           | 2400        | 9.55  | 6    | 2497.2278 | 3      |      | 0         | [19] Carbamidomethyl C                                                              | no              | 9.62e+004                     | 3.84e+004 | 1.51e+005 | 4.28e+004 |
| EVGTPHGILDSVDAAFI <sup>C</sup> PGSSR                                           | 9904        | 9.39  | 29   | 2497.1884 | 2      |      | 0         | [19] Carbamidomethyl C                                                              | no              | 1.30e+004                     | 5.88e+004 | 1.08e+005 | 3.04e+004 |
| EVGTPHGILDSVDAAFI <sup>C</sup> PGSSR                                           | 16967       | 9.55  | 4    | 2497.2032 | 2      |      | 0         | [19] Carbamidomethyl C                                                              | no              | 3192.02                       | 6974.88   | 2.26e+004 | 4392.08   |
| GEFVIVK                                                                        | 6956        | 8.25  | 13   | 764.4027  | 2      |      | 0         |                                                                                     | no              | 1.16e+004                     | 1.76e+004 | 1.19e+004 | 1.32e+004 |
| GGYTLVSGYPK                                                                    | 11643       | 7.83  | 14   | 1140.5579 | 1      |      | 0         |                                                                                     | no              | 3465.98                       | 3620.22   | 1.52e+004 | 7280.19   |
| LLQDEFPGIPSPDAAVE <sup>C</sup> HR                                              | 739         | 9.39  | 35   | 2363.1595 | 3      |      | 0         | [19] Carbamidomethyl C                                                              | yes             | 3.76e+005                     | 1.52e+006 | 1.42e+006 | 5.06e+005 |
| LLQDEFPGIPSPDAAVE <sup>C</sup> HR                                              | 8642        | 9.39  | 30   | 2363.1061 | 2      |      | 0         | [19] Carbamidomethyl C                                                              | yes             | 1.76e+004                     | 5.85e+004 | 7.84e+004 | 4.84e+004 |
| LVVIVLILK                                                                      | 4319        | 8.82  | 6    | 972.5371  | 2      |      | 0         |                                                                                     | no              | 1.16e+004                     | 4.00e+004 | 3.20e+004 | 1.07e+004 |
| NFPSPVDAAFR                                                                    | 359         | 8.52  | 36   | 1219.6052 | 2      |      | 0         |                                                                                     | yes             | 6.37e+005                     | 1.52e+006 | 7.33e+005 | 5.55e+005 |
| NFPSPVDAAFR                                                                    | 24032       | 8.78  | 2    | 1219.5919 | 1      |      | 0         |                                                                                     | no              | 1287.17                       | 85.07     | 5659.54   | 1898.72   |
| NFPSPVDAAFR                                                                    | 9513        | 8.52  | 33   | 1219.5866 | 1      |      | 0         |                                                                                     | yes             | 4.68e+004                     | 2.63e+004 | 4.85e+004 | 4.06e+004 |
| NFPSPVDAAFR                                                                    | 1793        | 8.78  | 2    | 1219.6012 | 2      |      | 0         |                                                                                     | no              | 1.20e+005                     | 1.85e+005 | 2.64e+005 | 1.19e+005 |
| QGHNSVFLIK                                                                     | 16115       | 6.73  | 4    | 1141.6258 | 3      |      | 0         |                                                                                     | no              | 1679.84                       | 34.27     | 7580.48   | 53.81     |
| QGHNSVFLIK                                                                     | 11917       | 7.33  | 7    | 1141.6286 | 3      |      | 0         |                                                                                     | no              | 821.83                        | 2.47e+004 | 1.50e+004 | 4034.55   |
| QGHNSVFLIK                                                                     | 12341       | 6.77  | 7    | 1141.6270 | 3      |      | 0         |                                                                                     | no              | 1.09e+004                     | 1972.04   | 523.33    | 4470.92   |
| QGHNSVFLIK                                                                     | 15415       | 7.32  | 3    | 1141.6235 | 3      |      | 0         |                                                                                     | no              | 0.00                          | 0.00      | 6808.96   | 301.17    |
| SGAQTAVITELPIVPIHEK                                                            | 1734        | 8.70  | 11   | 1836.9075 | 3      |      | 0         |                                                                                     | no              | 1.91e+005                     | 3.12e+005 | 7.79e+005 | 1.85e+005 |
| SLGPN <sup>C</sup> CSANGPGLYLIHGPNLY <sup>C</sup> YSDVEK                       | 1504        | 7.74  | 19   | 3281.5111 | 3      |      | 0         | [7] Carbamidomethyl C [24] Carbamidomethyl C                                        | yes             | 8.74e+005                     | 1.64e+006 | 1.04e+006 | 8.12e+005 |
| SLGPN <sup>C</sup> CSANGPGLYLIHGPNLY <sup>C</sup> YSDVEKLNAAK                  | 3975        | 7.07  | 4    | 3778.8132 | 4      |      | 0         | [7] Carbamidomethyl C [24] Carbamidomethyl C                                        | no              | 9.43e+005                     | 1.72e+005 | 8.50e+004 | 5.84e+005 |
| SLGPN <sup>C</sup> CSANGPGLYLIHGPNLY <sup>C</sup> YSDVEKLNAAK                  | 15749       | 7.07  | 2    | 3778.7897 | 3      |      | 0         | [7] Carbamidomethyl C [24] Carbamidomethyl C                                        | no              | 7.41e+004                     | 2602.00   | 3356.97   | 3.18e+004 |
| VDGAL <sup>C</sup> MEK                                                         | 7902        | 7.46  | 10   | 1021.4457 | 1      |      | 0         | [6] Carbamidomethyl C                                                               | no              | 7.07e+004                     | 2.68e+004 | 5.24e+004 | 7.34e+004 |
| VDGAL <sup>C</sup> MEKSLGPN <sup>C</sup> CSANGPGLYLIHGPNLY <sup>C</sup> YSDVEK | 9894        | 6.13  | 3    | 4300.8817 | 3      |      | 0         | [6] Carbamidomethyl C [7] Oxidation M [16] Carbamidomethyl C [33] Carbamidomethyl C | no              | 6.23e+004                     | 1.53e+004 | 1992.79   | 6.79e+004 |
| VVVVYPEKK                                                                      | 11511       | 6.87  | 3    | 1144.6236 | 3      |      | 0         |                                                                                     | no              | 1.03e+004                     | 4.44e+004 | 1.43e+004 | 5445.52   |
| YY <sup>C</sup> FQGNQFLR                                                       | 24802       | 9.58  | 20   | 1494.6668 | 1      |      | 0         | [3] Carbamidomethyl C                                                               | no              | 286.26                        | 3638.62   | 5841.89   | 300.43    |

Fragment ions for: LLQDEFPGIPSPDAAVECHR

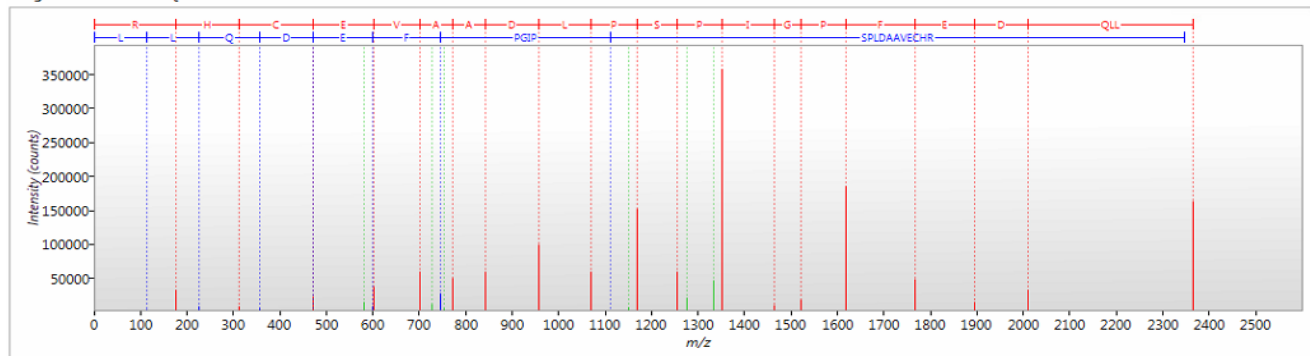

Fragment ions for: NFPSPVDAAFR

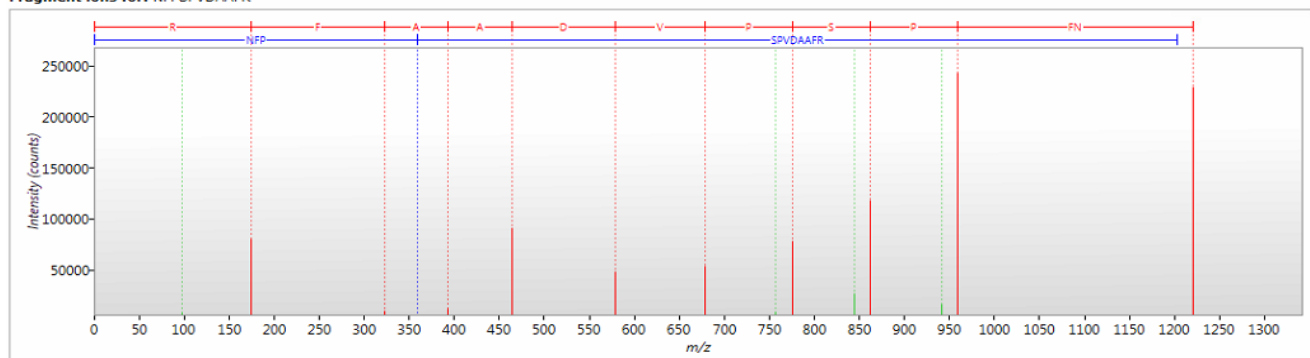

Fragment ions for: SLGPN<sup>C</sup>CSANGPGLYLIHGPNLY<sup>C</sup>YSDVEK

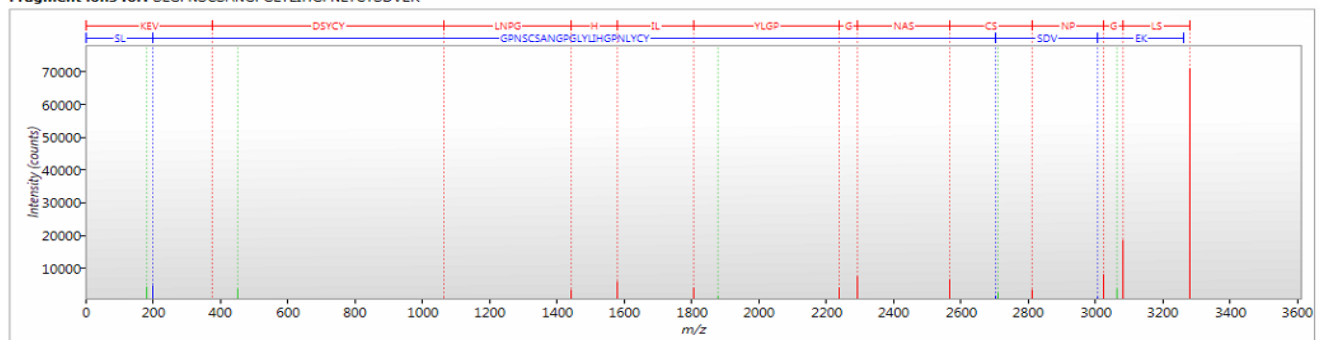



Ig gamma-1 chain C region OS=Homo sapiens GN=IGHG1 PE=1 SV=1  
6 peptides

| Sequence                   | Peptide Ion | Score | Hits | Mass      | Charge | Tags | Conflicts | Modifications                               | In quantitation | Average Normalised Abundances |           |           |           |
|----------------------------|-------------|-------|------|-----------|--------|------|-----------|---------------------------------------------|-----------------|-------------------------------|-----------|-----------|-----------|
|                            |             |       |      |           |        |      |           |                                             |                 | PCa                           | BPH       | Bc        | Rc        |
| FNWYVDGVEVHNAK             | 134         | 9.94  | 38   | 1676.7989 | 3      |      | 0         |                                             | yes             | 1.37e+006                     | 4.91e+006 | 2.79e+006 | 1.32e+006 |
| FNWYVDGVEVHNAKTKPR         | 3105        | 7.42  | 9    | 2159.0944 | 3      |      | 0         |                                             | no              | 4.41e+005                     | 2.21e+005 | 1.36e+005 | 3.60e+005 |
| GPSVFPLAPSSK               | 120         | 9.74  | 29   | 1185.6400 | 2      |      | 0         |                                             | yes             | 1.57e+006                     | 4.57e+006 | 2.73e+006 | 1.93e+006 |
| GPSVFPLAPSSK               | 6495        | 9.74  | 22   | 1185.6390 | 1      |      | 0         |                                             | yes             | 3.49e+004                     | 7.79e+004 | 1.01e+005 | 5.23e+004 |
| THTCPPCPAPELLGGPSVFLFPPKPK | 6391        | 9.42  | 18   | 2843.4363 | 3      |      | 0         | [4] Carbamidomethyl C.[7] Carbamidomethyl C | no              | 5.99e+005                     | 1.45e+006 | 2.95e+005 | 4.45e+005 |
| TPEVTCVVVDVSHEDPEVK        | 37          | 10.19 | 40   | 2138.0245 | 3      |      | 0         | [6] Carbamidomethyl C                       | yes             | 3.86e+006                     | 1.35e+007 | 8.12e+006 | 4.32e+006 |
| TPEVTCVVVDVSHEDPEVK        | 975         | 10.19 | 40   | 2138.0098 | 2      |      | 0         | [6] Carbamidomethyl C                       | yes             | 5.18e+005                     | 1.10e+006 | 9.47e+005 | 5.63e+005 |
| TTPPVLDSDGSFFLYSK          | 12563       | 9.44  | 6    | 1872.8941 | 1      |      | 0         |                                             | no              | 200.07                        | 4984.66   | 5.92e+004 | 2035.40   |

Fragment ions for: FNWYVDGVEVHNAK

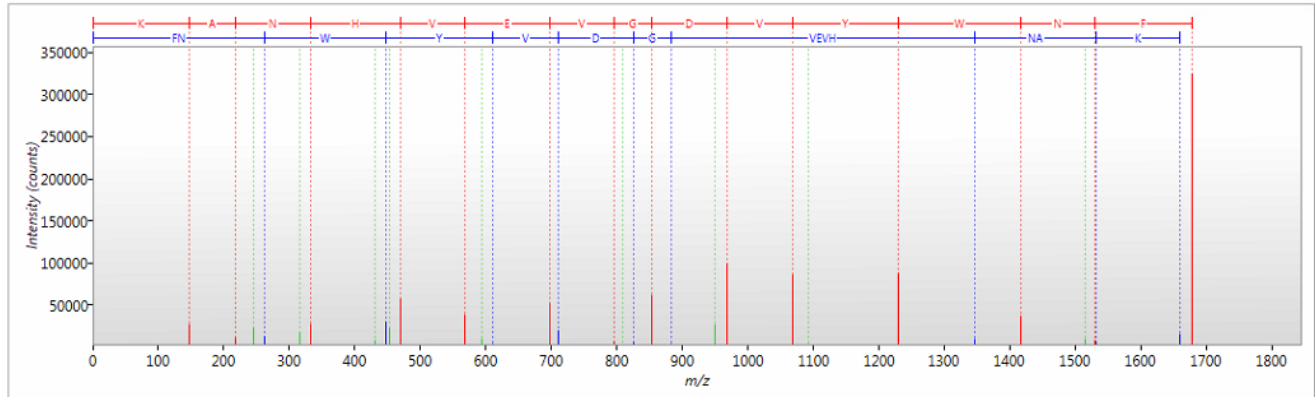

Fragment ions for: GPSVFPLAPSSK

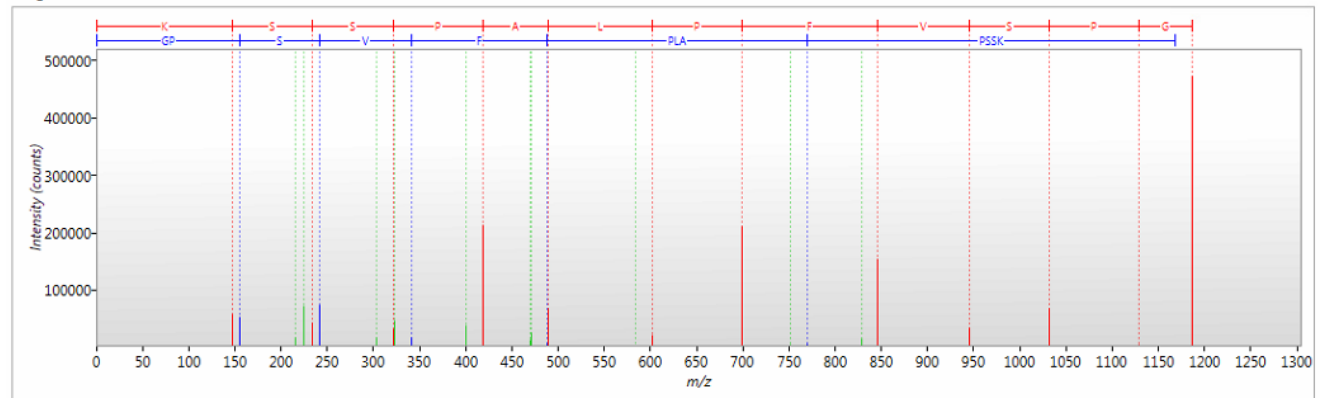

Fragment ions for: TPEVTCVVVDVSHEDPEVK

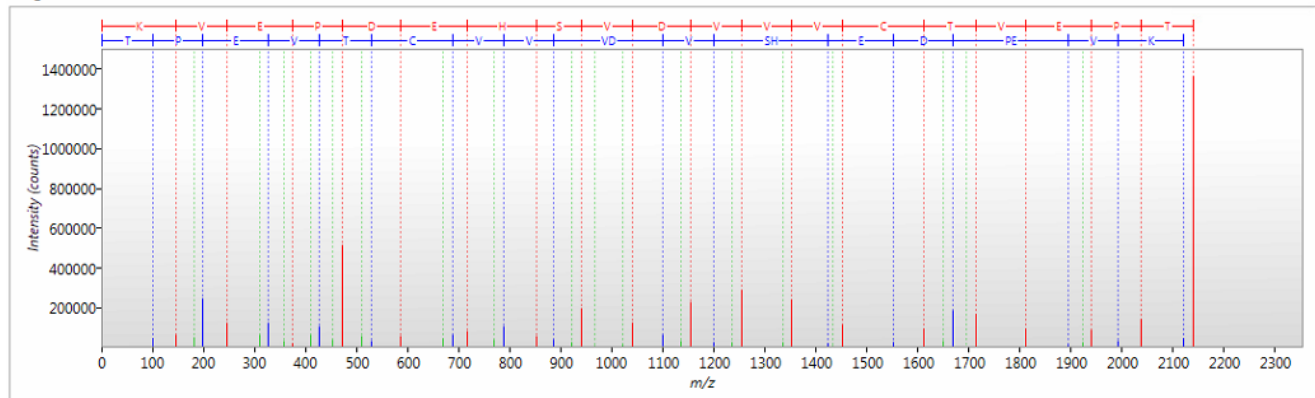

Lithostathine-1-alpha OS=Homo sapiens GN=REG1A PE=1 SV=3  
5 peptides

| Sequence                                        | Peptide Ion | Score | Hits | Mass      | Charge | Tags | Conflicts | Modifications          | In quantitation | Average Normalised Abundances |           |           |           |
|-------------------------------------------------|-------------|-------|------|-----------|--------|------|-----------|------------------------|-----------------|-------------------------------|-----------|-----------|-----------|
|                                                 |             |       |      |           |        |      |           |                        |                 | PCa                           | BPH       | Bc        | Rc        |
| DVP <sup>C</sup> EDK                            | 8919        | 6.35  | 2    | 861.3525  | 1      |      | 0         | [4] Carbamidomethyl C  | yes             | 6.63e+004                     | 4.49e+004 | 5.02e+004 | 5.85e+004 |
| IS <sup>C</sup> PEGTNAYR                        | 1730        | 8.51  | 10   | 1266.5851 | 2      |      | 1         | [3] Carbamidomethyl C  | no              | 3.43e+005                     | 2.48e+005 | 1.56e+005 | 3.13e+005 |
| MAQTSSYF <sup>C</sup> MLISCLMFLSQSQGQEAQTELPQAR | 10493       | 5.55  | 2    | 3780.8949 | 4      |      | 0         | [13] Carbamidomethyl C | yes             | 4.39e+005                     | 1.20e+005 | 1.24e+005 | 3.24e+005 |
| MAQTSSYF <sup>C</sup> MLISCLMFLSQSQGQEAQTELPQAR | 14206       | ---   | ---  | 3780.9118 | 3      |      | 0         | [13] Carbamidomethyl C | yes             | 2.12e+005                     | 1.16e+004 | 2.95e+004 | 2.17e+005 |
| SWIGIGAPSSVNP <sup>C</sup> GYCVSLTSSSTGFQK      | 12052       | 7.62  | 5    | 2686.2267 | 2      |      | 0         | [15] Carbamidomethyl C | yes             | 1.06e+005                     | 3.11e+004 | 1.35e+004 | 6.86e+004 |
| SY <sup>C</sup> YFNEDR                          | 36560       | 7.93  | 2    | 1415.6434 | 1      |      | 0         | [3] Carbamidomethyl C  | no              | 2589.29                       | 626.70    | 2911.25   | 375.00    |

Fragment ions for: DVP<sup>C</sup>EDK

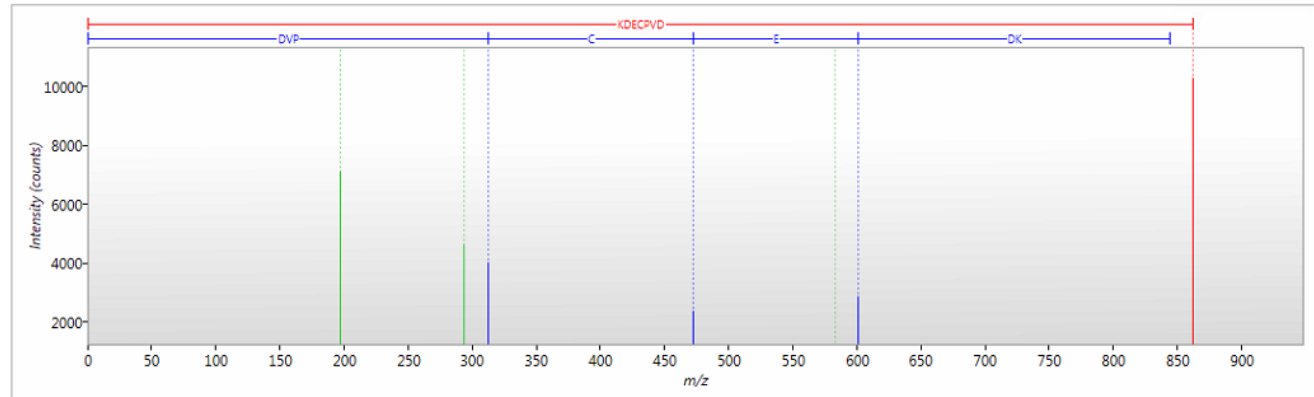

Fragment ions for: MAQTSSYF<sup>C</sup>MLISCLMFLSQSQGQEAQTELPQAR

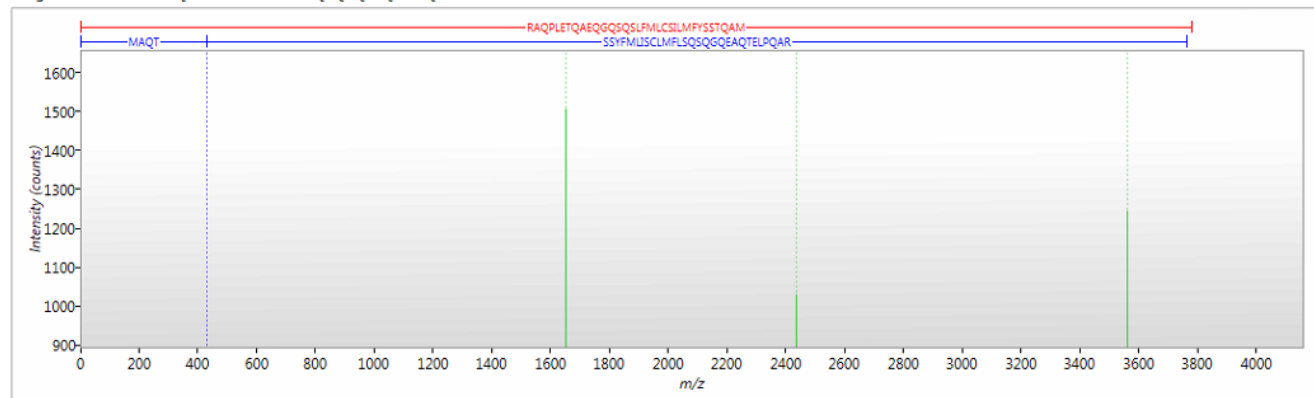

Fragment ions for: SWIGIGAPSSVNP<sup>C</sup>GYCVSLTSSSTGFQK

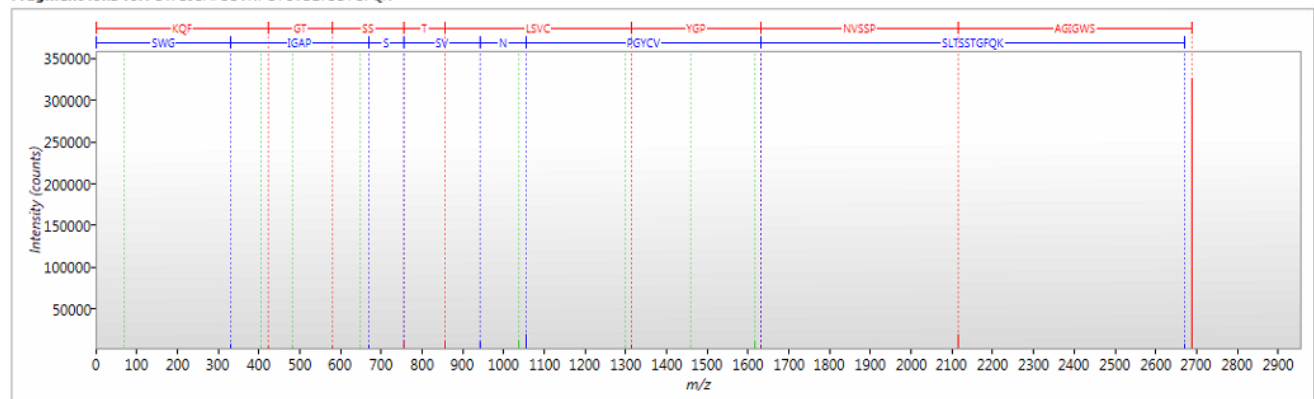



Lysosomal acid phosphatase OS=Homo sapiens GN=ACP2 PE=1 SV=3  
5 peptides

| Sequence              | Peptide Ion | Score | Hits | Mass      | Charge | Tags | Conflicts | Modifications         | In quantitation | Average Normalised Abundances |           |           |           |
|-----------------------|-------------|-------|------|-----------|--------|------|-----------|-----------------------|-----------------|-------------------------------|-----------|-----------|-----------|
|                       |             |       |      |           |        |      |           |                       |                 | PCa                           | BPH       | Bc        | Rc        |
| CPLQDFLR              | 3417        | 7.36  | 4    | 1047.5278 | 2      |      | 0         | [1] Carbamidomethyl C | yes             | 7.69e+004                     | 7.35e+004 | 4.03e+004 | 1.39e+005 |
| DPYQEEV/PQGFQQLTK     | 6536        | 5.92  | 2    | 2051.0637 | 3      |      | 0         |                       | no              | 6.51e+004                     | 4.78e+004 | 2.02e+004 | 2.86e+004 |
| FPLGPCPR              | 226         | 6.55  | 3    | 942.5178  | 2      |      | 0         | [6] Carbamidomethyl C | yes             | 6.51e+005                     | 1.74e+006 | 1.31e+006 | 9.69e+005 |
| QTPEYQNESSR           | 4272        | 6.17  | 2    | 1337.5738 | 2      |      | 1         |                       | no              | 1.72e+005                     | 9.94e+004 | 7.31e+004 | 1.71e+005 |
| QTPEYQNESSR           | 4291        | 6.17  | 2    | 1337.5693 | 3      |      | 1         |                       | no              | 1.31e+004                     | 5440.79   | 2860.27   | 1.28e+004 |
| TYPKDPYQEEV/PQGFQQLTK | 4977        | 6.84  | 4    | 2540.1879 | 3      |      | 0         |                       | yes             | 1.96e+005                     | 1.44e+005 | 1.27e+005 | 2.89e+005 |
| TYPKDPYQEEV/PQGFQQLTK | 28353       | 6.84  | 3    | 2540.1784 | 2      |      | 0         |                       | yes             | 879.82                        | 113.84    | 181.07    | 1.30e+004 |

Fragment ions for: CPLQDFLR

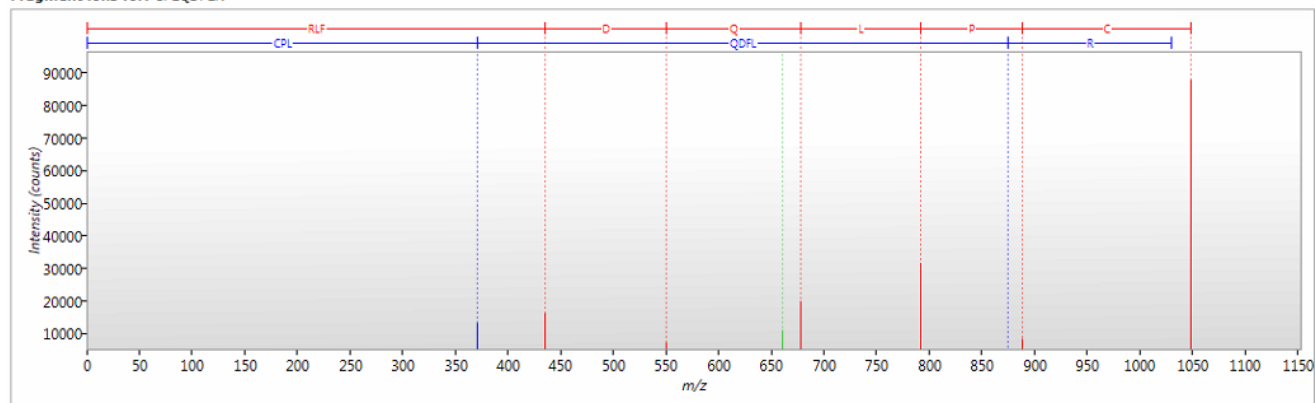

Fragment ions for: FPLGPCPR

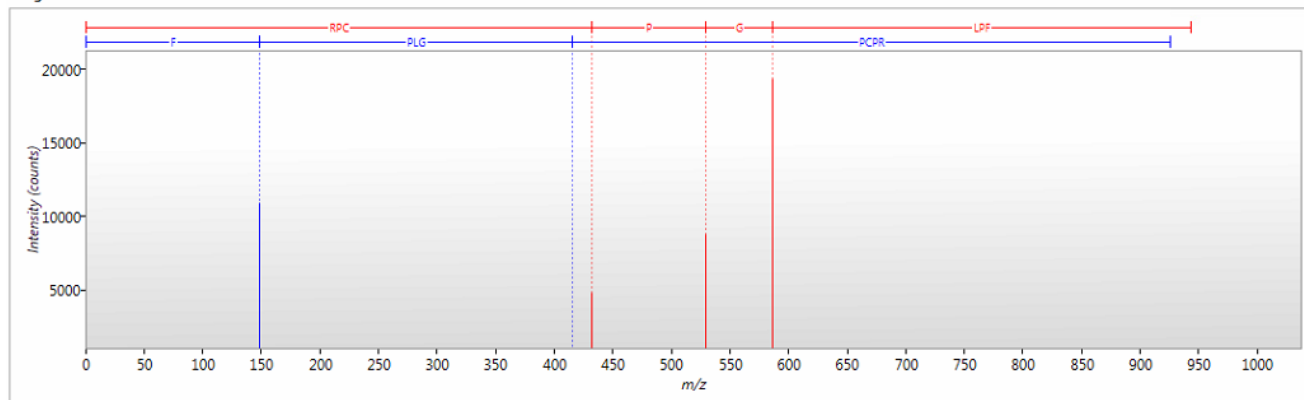

Fragment ions for: TYPKDPYQEEV/PQGFQQLTK

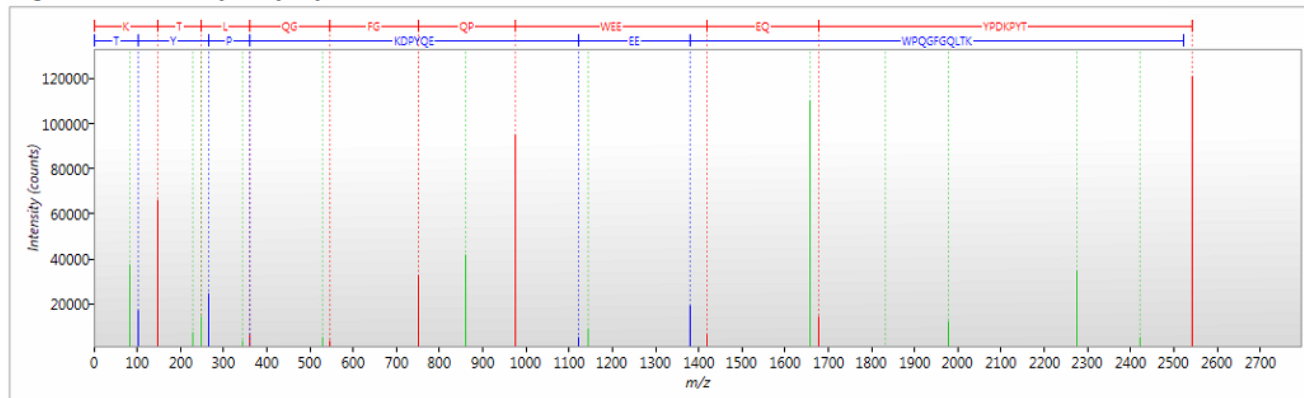

Neutrophil elastase OS=Homo sapiens GN=ELANE PE=1 SV=1  
3 peptides

| Sequence           | Peptide Ion | Score | Hits | Mass      | Charge | Tags | Conflicts | Modifications          | In quantitation | Average Normalised Abundances |           |           |           |
|--------------------|-------------|-------|------|-----------|--------|------|-----------|------------------------|-----------------|-------------------------------|-----------|-----------|-----------|
|                    |             |       |      |           |        |      |           |                        |                 | PCa                           | BPH       | Bc        | Rc        |
| GIASVLQELNVTVTSLCR | 108         | 6.36  | 2    | 2058.1066 | 3      |      | 0         | [18] Carbamidomethyl C | yes             | 3.06e+006                     | 9.87e+006 | 5.81e+006 | 7.10e+006 |
| SNVCTLVLR          | 774         | 8.50  | 7    | 947.4753  | 2      |      | 0         | [4] Carbamidomethyl C  | yes             | 7.52e+004                     | 4.72e+005 | 2.14e+005 | 9.47e+004 |
| SNVCTLVLR          | 8331        | 8.50  | 7    | 947.4689  | 1      |      | 0         | [4] Carbamidomethyl C  | no              | 1.00e+004                     | 2.69e+004 | 2.93e+004 | 1.16e+004 |
| VVLGAHNLSR         | 1378        | 7.85  | 2    | 1064.5671 | 2      |      | 0         |                        | yes             | 8.65e+004                     | 1.44e+005 | 1.91e+005 | 8.67e+004 |
| VVLGAHNLSR         | 21155       | 7.85  | 2    | 1064.5979 | 1      |      | 0         |                        | yes             | 948.68                        | 399.85    | 4308.81   | 883.22    |

Fragment ions for: GIASVLQELNVTVTSLCR

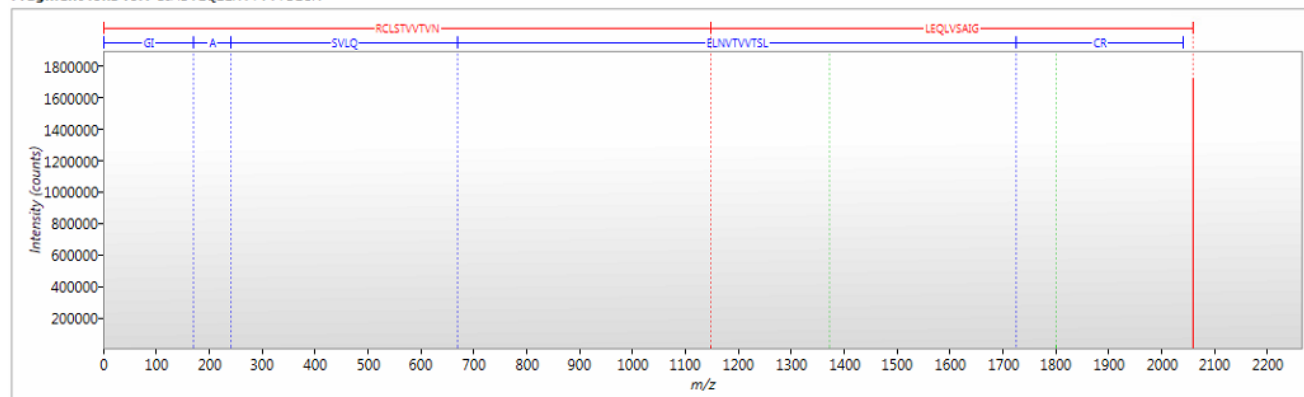

Fragment ions for: SNVCTLVLR

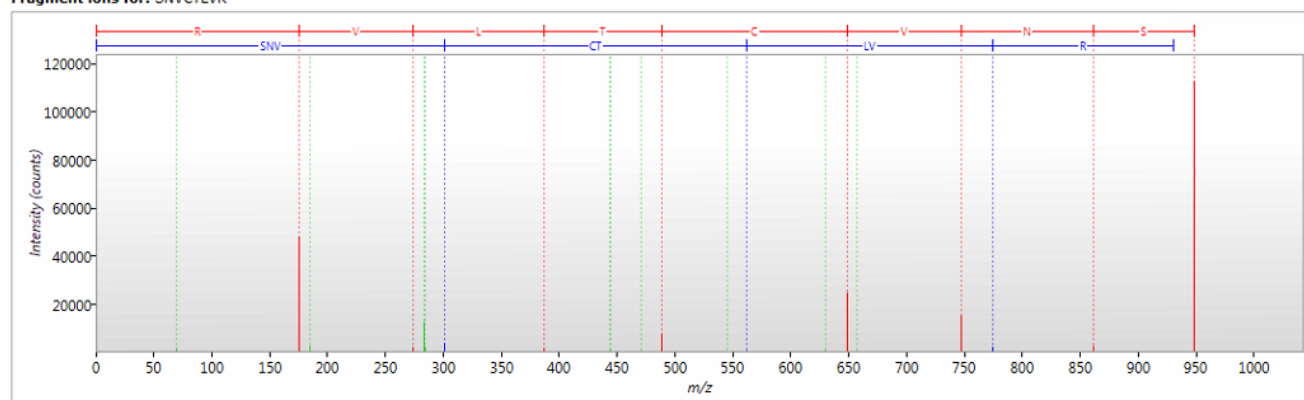

Fragment ions for: VVLGAHNLSR

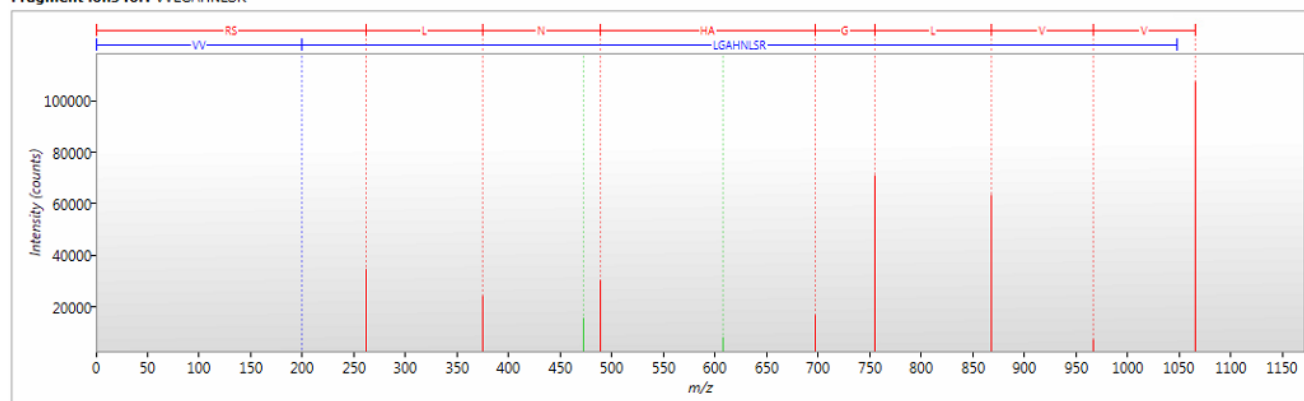

Non-secretory ribonuclease OS=Homo sapiens GN=RNASE2 PE=1 SV=2  
4 peptides

| Sequence                                 | Peptide Ion | Score | Hits | Mass      | Charge | Tags | Conflicts | Modifications                                                       | In quantitation | Average Normalised Abundances |           |           |           |  |
|------------------------------------------|-------------|-------|------|-----------|--------|------|-----------|---------------------------------------------------------------------|-----------------|-------------------------------|-----------|-----------|-----------|--|
|                                          |             |       |      |           |        |      |           |                                                                     |                 | PCa                           | BPH       | Bc        | Rc        |  |
| NCHHSQSQPLIH <sup>+</sup> CNLTTPSQNISNCR | 37114       | 6.28  | 2    | 3227.5388 | 4      |      | 0         | [2] Carbamidomethyl C [14] Carbamidomethyl C [27] Carbamidomethyl C | no              | 1.52e+004                     | 1520.83   | 552.59    | 4546.25   |  |
| RDPPQYPVVPVHLDR                          | 1826        | 9.21  | 13   | 1786.9502 | 3      |      | 4         |                                                                     | no              | 8.00e+005                     | 7.19e+005 | 5.05e+005 | 1.12e+006 |  |
| RDPPQYPVVPVHLDR                          | 1834        | 9.21  | 11   | 1786.8730 | 2      |      | 4         |                                                                     | no              | 7.58e+005                     | 4.67e+005 | 3.11e+005 | 7.08e+005 |  |
| YAQTANMFYIVACDNR                         | 3357        | 9.22  | 18   | 2032.9330 | 2      |      | 0         | [14] Carbamidomethyl C                                              | yes             | 3.96e+005                     | 9.64e+004 | 9.22e+004 | 3.96e+005 |  |
| YAQTANMFYIVACDNR                         | 7697        | 9.22  | 3    | 2032.9203 | 3      |      | 0         | [14] Carbamidomethyl C                                              | yes             | 7.79e+004                     | 2.44e+004 | 2.00e+004 | 4.83e+004 |  |
| YAQTANMFYIVACDNR                         | 4203        | 8.65  | 9    | 2048.9156 | 2      |      | 0         | [8] Oxidation M [14] Carbamidomethyl C                              | yes             | 2.63e+005                     | 6.99e+004 | 2.92e+004 | 2.20e+005 |  |

Fragment ions for: YAQTANMFYIVACDNR

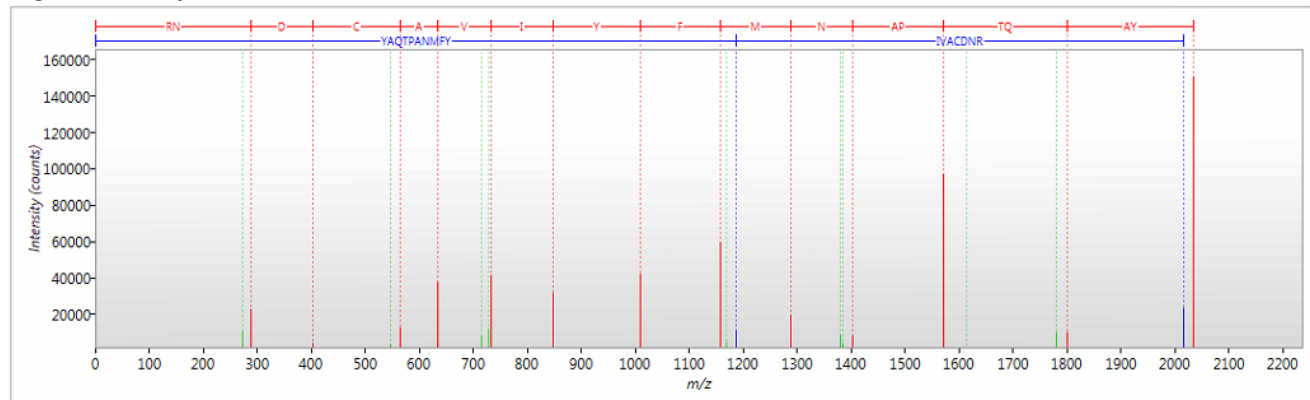

Fragment ions for: YAQTANMFYIVACDNR

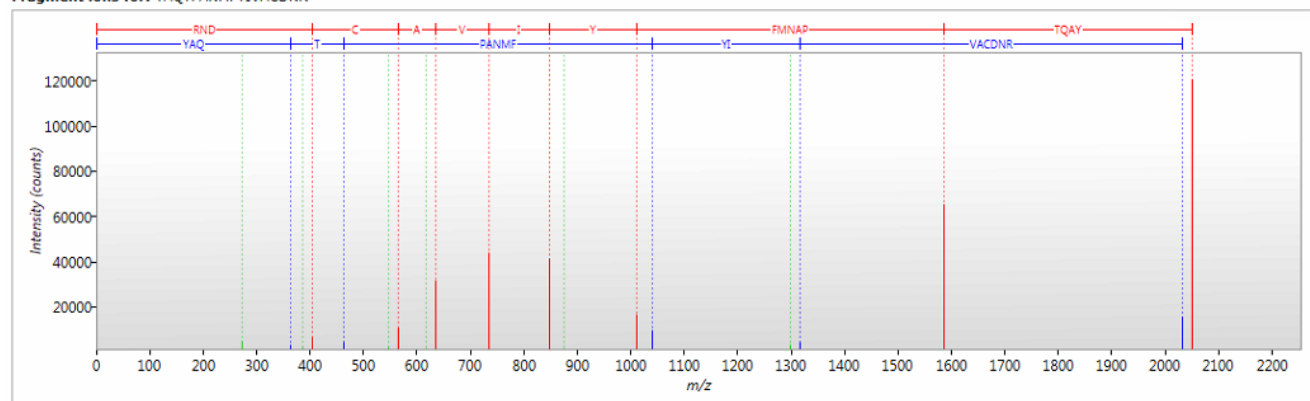

Osteopontin OS=Homo sapiens GN=SPP1 PE=1 SV=1  
12 peptides

| Sequence                     | Peptide Ion | Score | Hits | Mass      | Charge | Tags | Conflicts | Modifications    | In quantitation | Average Normalised Abundances |           |           |           |
|------------------------------|-------------|-------|------|-----------|--------|------|-----------|------------------|-----------------|-------------------------------|-----------|-----------|-----------|
|                              |             |       |      |           |        |      |           |                  |                 | PCa                           | BPH       | Bc        | Rc        |
| AIPVAQDLNAPSDVDSR            | 49          | 10.19 | 29   | 1853.8932 | 2      |      | 0         |                  | yes             | 4.91e+006                     | 1.41e+006 | 2.94e+005 | 8.90e+006 |
| AIPVAQDLNAPSDVDSR            | 12065       | 8.56  | 2    | 1853.8636 | 1      |      | 0         |                  | yes             | 2.10e+004                     | 2349.36   | 38.11     | 5.26e+004 |
| ANDESNEHSDVIDSQELSK          | 8148        | 9.02  | 19   | 2115.8263 | 2      |      | 1         |                  | no              | 6.43e+004                     | 2.81e+004 | 8.19e+004 | 9.37e+004 |
| DSYETSQLDDQSAETHSHK          | 15603       | 7.64  | 2    | 2176.9175 | 3      |      | 0         |                  | no              | 7767.28                       | 20.15     | 0.00      | 12.49     |
| GDSVYVGLR                    | 883         | 9.36  | 27   | 964.4756  | 1      |      | 0         |                  | no              | 3.96e+005                     | 3.11e+005 | 2.92e+005 | 7.03e+005 |
| GKDSYETSQLDDQSAETHSHK        | 2773        | 9.70  | 12   | 2362.0429 | 4      |      | 0         |                  | no              | 1.21e+005                     | 2.30e+004 | 1.41e+004 | 1.34e+005 |
| GKDSYETSQLDDQSAETHSHK        | 18667       | ---   | ---  | 2362.0330 | 5      |      | 0         |                  | no              | 5575.23                       | 1809.25   | 66.66     | 4217.73   |
| GKDSYETSQLDDQSAETHSHK        | 13960       | ---   | ---  | 2362.0279 | 2      |      | 0         |                  | no              | 2.95e+004                     | 6476.19   | 8218.69   | 5.87e+004 |
| GKDSYETSQLDDQSAETHSHK        | 12532       | ---   | ---  | 2362.0287 | 2      |      | 1         |                  | no              | 3280.36                       | 732.37    | 2933.33   | 3.50e+004 |
| GKDSYETSQLDDQSAETHSHK        | 4598        | 9.56  | 5    | 2362.0252 | 3      |      | 0         |                  | no              | 9.44e+004                     | 1.66e+004 | 2.21e+004 | 1.60e+004 |
| GKDSYETSQLDDQSAETHSHK        | 3955        | 9.70  | 19   | 2362.0292 | 3      |      | 0         |                  | no              | 2.10e+005                     | 7.52e+004 | 4.88e+004 | 2.80e+005 |
| GKDSYETSQLDDQSAETHSHK        | 3829        | 8.50  | 2    | 2362.0276 | 3      |      | 0         |                  | no              | 1.27e+005                     | 6.21e+004 | 6.42e+004 | 2.21e+005 |
| GKDSYETSQLDDQSAETHSHK        | 22782       | ---   | ---  | 2362.0290 | 2      |      | 0         |                  | no              | 9947.65                       | 20.17     | 299.55    | 726.90    |
| GKDSYETSQLDDQSAETHSHK        | 2706        | 9.56  | 6    | 2362.0348 | 4      |      | 0         |                  | no              | 1.46e+005                     | 2.86e+004 | 3.58e+004 | 4.06e+004 |
| ISHELDSASSEVN                | 8146        | 8.98  | 16   | 1386.6102 | 1      |      | 0         |                  | no              | 2.39e+004                     | 8453.70   | 1.26e+004 | 3.29e+004 |
| ISHELDSASSEVN                | 223         | 8.98  | 18   | 1386.6220 | 2      |      | 0         |                  | no              | 7.87e+005                     | 7.03e+005 | 2.46e+005 | 9.83e+005 |
| KANDESNEHSDVIDSQELSK         | 12254       | 8.30  | 7    | 2244.0060 | 2      |      | 0         |                  | no              | 3.96e+004                     | 8692.03   | 3355.67   | 6.88e+004 |
| QETLPSK                      | 3207        | 8.97  | 15   | 801.4198  | 1      |      | 0         |                  | no              | 1.94e+004                     | 7762.62   | 3168.97   | 5.23e+004 |
| QETLPSK                      | 1769        | 9.24  | 4    | 801.4157  | 2      |      | 0         |                  | no              | 6.80e+004                     | 4.41e+004 | 2.50e+004 | 9.14e+004 |
| QETLPSK                      | 750         | 8.97  | 16   | 801.4209  | 2      |      | 0         |                  | no              | 1.16e+005                     | 1.17e+005 | 5.00e+004 | 1.85e+005 |
| QLYNKYPDAVATV/LNPDPSQK       | 4022        | 9.67  | 26   | 2447.2022 | 2      |      | 0         |                  | yes             | 4.58e+005                     | 1.07e+005 | 7.29e+004 | 6.74e+005 |
| QLYNKYPDAVATV/LNPDPSQK       | 395         | 9.67  | 28   | 2447.2125 | 3      |      | 0         |                  | yes             | 3.46e+006                     | 1.29e+006 | 3.70e+005 | 5.62e+006 |
| QNLLAPQNAVSEETNDFKQETLPSK    | 15602       | 9.06  | 21   | 2887.4166 | 2      |      | 0         |                  | no              | 1.53e+004                     | 1040.55   | 97.36     | 1.50e+004 |
| QNLLAPQNAVSEETNDFKQETLPSK    | 726         | 9.06  | 29   | 2887.4055 | 3      |      | 0         |                  | no              | 1.09e+006                     | 2.42e+005 | 2.49e+005 | 1.07e+006 |
| RPDIQYPDATDEDTISHMESEELNGAYK | 16392       | 7.96  | 2    | 3239.4217 | 3      |      | 0         | [18] Oxidation M | no              | 1.01e+004                     | 3175.95   | 3927.86   | 1.81e+004 |
| YPDAVATV/LNPDPSQK            | 282         | 9.94  | 20   | 1800.8694 | 2      |      | 0         |                  | yes             | 1.57e+006                     | 1.16e+006 | 5.08e+005 | 4.30e+006 |
| YPDAVATV/LNPDPSQK            | 23471       | ---   | ---  | 1800.8552 | 1      |      | 0         |                  | yes             | 1917.48                       | 50.20     | 306.93    | 2.78e+004 |

Fragment ions for: AIPVAQDLNAPSDVDSR

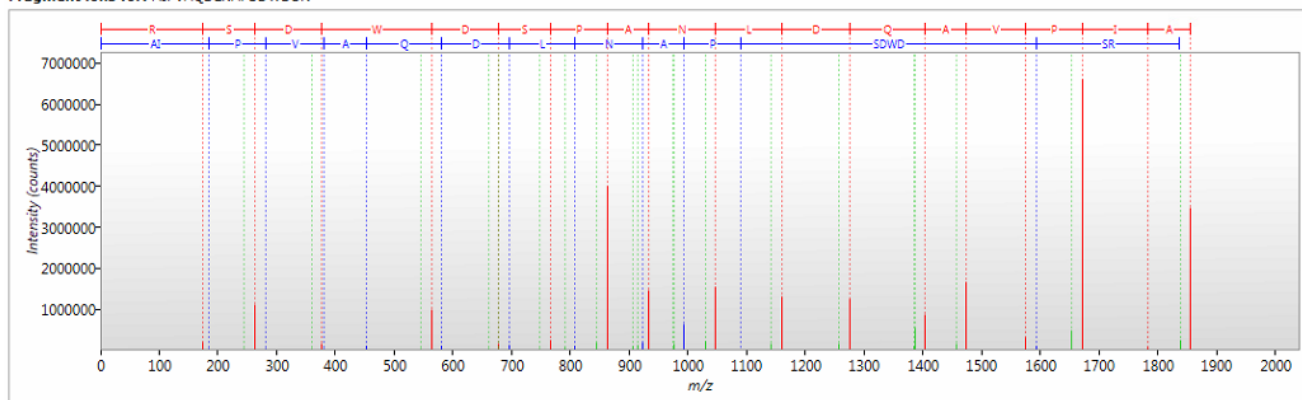

Fragment ions for: QLYNKYPDAVATV/LNPDPSQK

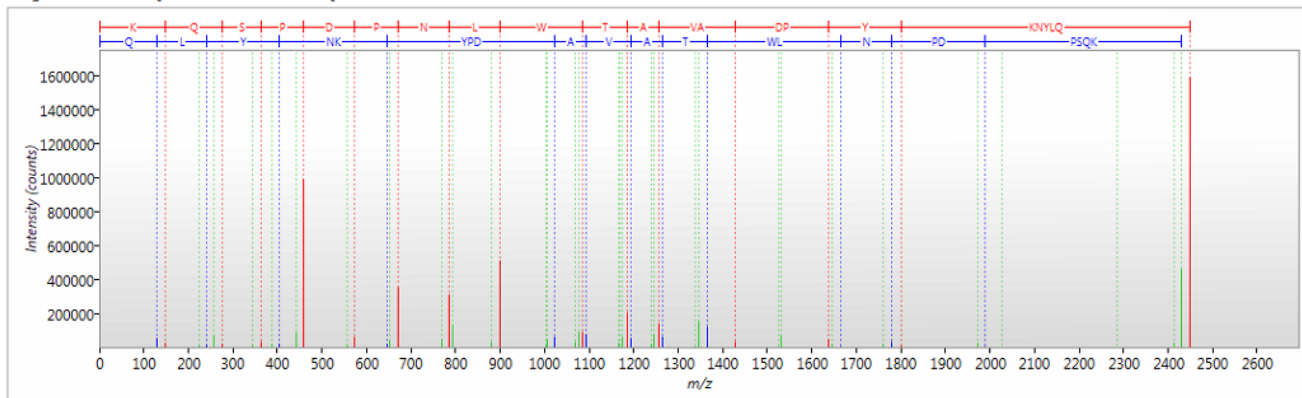

Fragment ions for: YPDAVATWLNPDPSQK

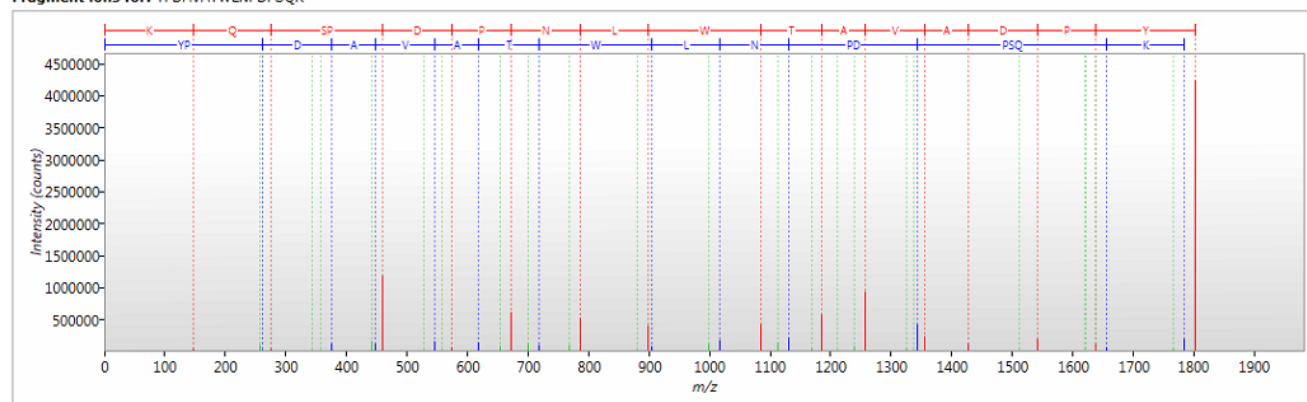

Pancreatic alpha-amylase OS=Homo sapiens GN=AMY2A PE=1 SV=2  
3 peptides

| Sequence          | Peptide Ion | Score | Hits | Mass      | Charge | Tags | Conflicts | Modifications | In quantitation | Average Normalised Abundances |           |           |           |
|-------------------|-------------|-------|------|-----------|--------|------|-----------|---------------|-----------------|-------------------------------|-----------|-----------|-----------|
|                   |             |       |      |           |        |      |           |               |                 | PCa                           | BPH       | Bc        | Rc        |
| DFPAVPYSGW/DFNDGK | 3244        | 9.05  | 24   | 1813.8456 | 2      |      | 1         |               | yes             | 6.36e+005                     | 3.06e+005 | 1.28e+005 | 4.56e+005 |
| NWGEGW/GFVPSDR    | 40574       | 8.92  | 4    | 1505.7445 | 1      |      | 0         |               | yes             | 3908.80                       | 198.28    | 149.71    | 3108.02   |
| TGSGDIENYNDATQVR  | 828         | 9.47  | 27   | 1738.7766 | 2      |      | 1         |               | yes             | 5.69e+005                     | 3.87e+005 | 1.83e+005 | 6.98e+005 |

Fragment ions for: DFPAVPYSGWDFNDGK

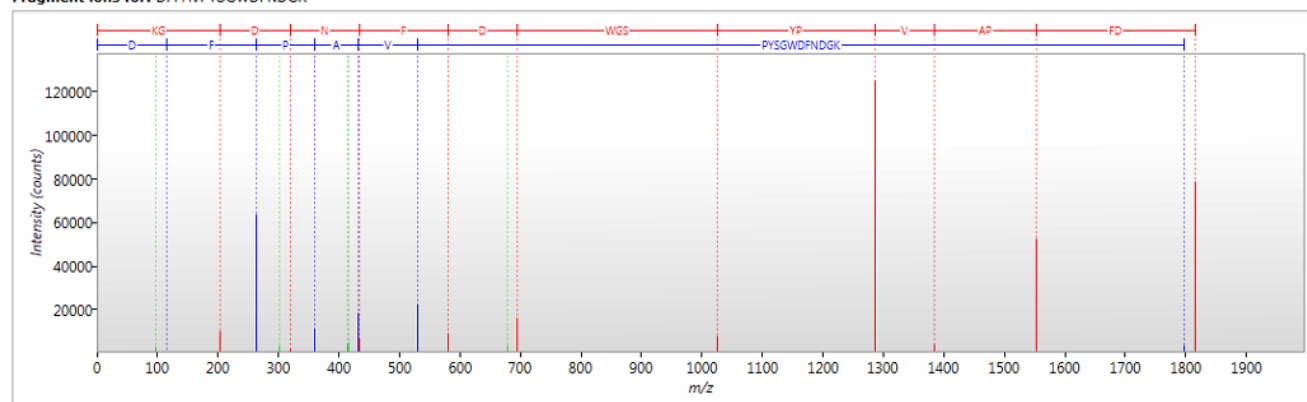

Fragment ions for: NWGEGW/GFVPSDR

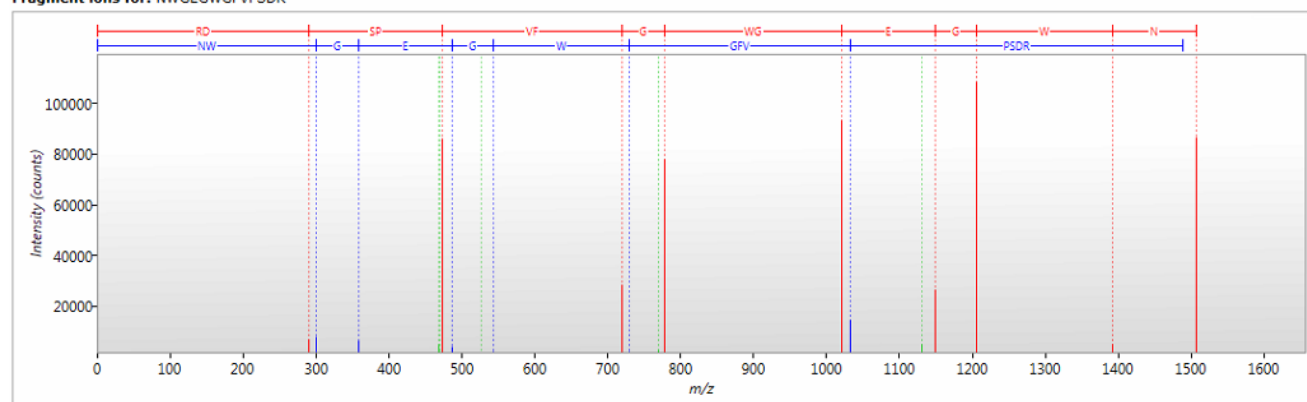

Fragment ions for: TGSGDIENYNDATQVR

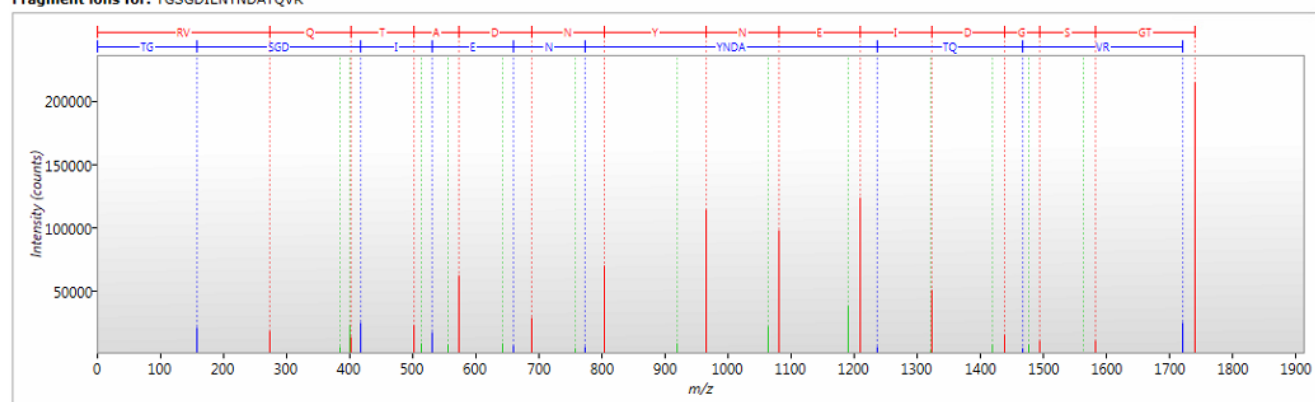

Phosphatidylethanolamine-binding protein 1 OS=Homo sapiens GN=PEBP1 PE=1 SV=3  
3 peptides

| Sequence       | Peptide Ion | Score | Hits | Mass      | Charge | Tags | Conflicts | Modifications         | In quantitation | Average Normalised Abundances |           |           |           |
|----------------|-------------|-------|------|-----------|--------|------|-----------|-----------------------|-----------------|-------------------------------|-----------|-----------|-----------|
|                |             |       |      |           |        |      |           |                       |                 | PCa                           | BPH       | Bc        | Rc        |
| ČDEPILSNRSGDHR | 1506        | 6.48  | 2    | 1654.7567 | 3      |      | 0         | [1] Carbamidomethyl C | yes             | 1.70e+005                     | 8.96e+005 | 2.67e+005 | 3.94e+005 |
| ČDEPILSNRSGDHR | 4567        | 6.48  | 2    | 1654.7438 | 2      |      | 0         | [1] Carbamidomethyl C | yes             | 6.62e+004                     | 2.32e+005 | 9.78e+004 | 1.17e+005 |
| LYEQLSGK       | 504         | 7.06  | 3    | 936.4529  | 1      |      | 0         |                       | yes             | 3.00e+005                     | 6.88e+005 | 7.13e+005 | 3.37e+005 |
| VLTPQTQVK      | 27675       | 7.13  | 3    | 884.5237  | 1      |      | 0         |                       | yes             | 210.67                        | 0.96      | 45.33     | 945.23    |

Fragment ions for: CDEPILSNRSGDHR

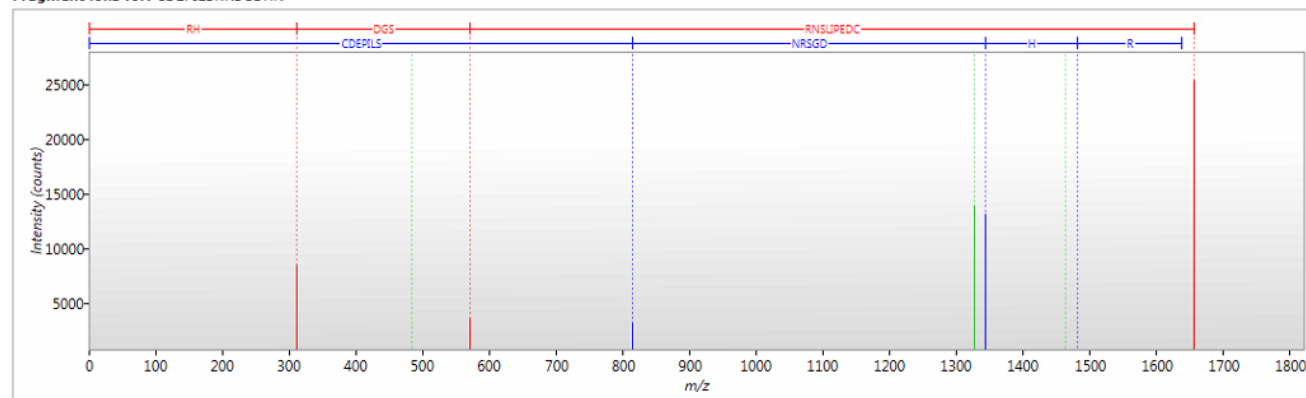

Fragment ions for: LYEQLSGK

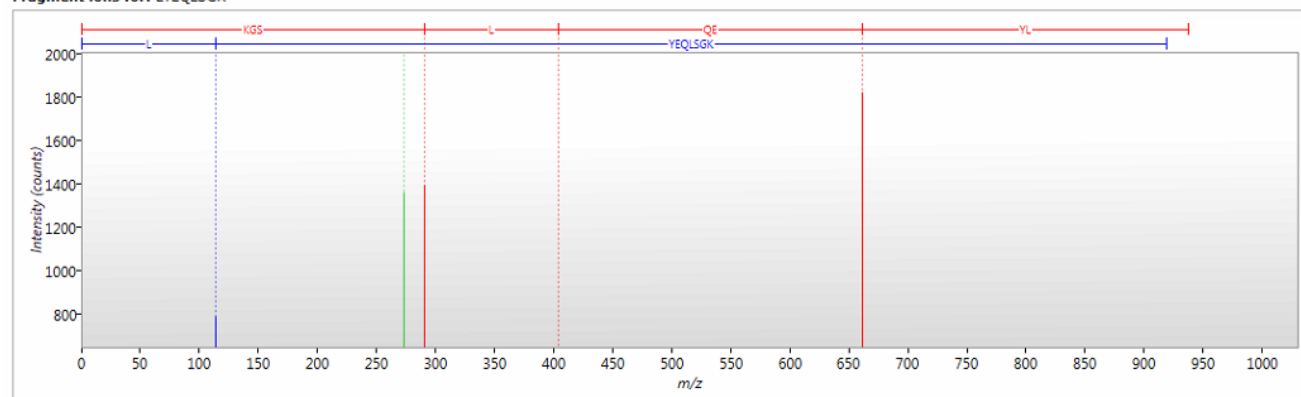

Fragment ions for: VLTPQTQVK

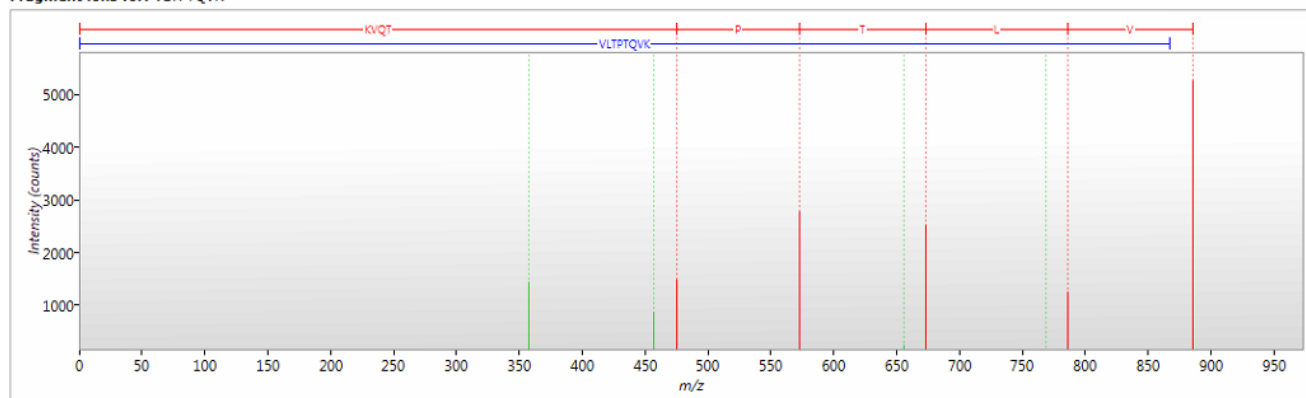

Pregnancy zone protein OS=Homo sapiens GN=PZP PE=1 SV=4  
7 peptides

| Sequence            | Peptide Ion | Score | Hits | Mass      | Charge | Tags | Conflicts | Modifications                               | In quantitation | Average Normalised Abundances |           |           |           |  |
|---------------------|-------------|-------|------|-----------|--------|------|-----------|---------------------------------------------|-----------------|-------------------------------|-----------|-----------|-----------|--|
|                     |             |       |      |           |        |      |           |                                             |                 | PCa                           | BPH       | Bc        | Rc        |  |
| ATVLNLYPK           | 3454        | 8.16  | 2    | 1017.4788 | 2      |      | 0         |                                             | yes             | 7.01e+004                     | 1.59e+005 | 1.78e+005 | 7.47e+004 |  |
| ATVLNLYPK           | 6752        | 8.16  | 3    | 1017.4771 | 1      |      | 0         |                                             | yes             | 1.81e+005                     | 1.66e+005 | 2.07e+005 | 2.05e+005 |  |
| ATVLNLYPK           | 11989       | 7.65  | 2    | 1017.5664 | 1      |      | 0         |                                             | no              | 1.43e+004                     | 1.33e+004 | 2.54e+004 | 1.99e+004 |  |
| GEESYICGNER         | 3626        | 5.16  | 2    | 1472.5341 | 3      |      | 0         | [6] Carbamidomethyl C.[8] Carbamidomethyl C | no              | 3.23e+004                     | 4.41e+004 | 3.42e+004 | 1.97e+004 |  |
| NQGNTVLTAFVLK       | 59867       | 8.88  | 2    | 1490.7403 | 2      |      | 0         |                                             | no              | 2.56e+004                     | 6.78e+004 | 5.62e+004 | 5.52e+004 |  |
| NQGNTVLTAFVLKTFQAAR | 33453       | 7.99  | 5    | 2165.0244 | 2      |      | 0         |                                             | no              | 3.85e+004                     | 2.15e+004 | 1.17e+004 | 1.38e+004 |  |
| SSGSLNNIAIK         | 1003        | 8.83  | 3    | 1102.6033 | 2      |      | 0         |                                             | yes             | 2.86e+005                     | 3.97e+005 | 6.70e+005 | 2.32e+005 |  |
| SSGSLNNIAIK         | 12251       | 8.83  | 2    | 1102.5911 | 1      |      | 0         |                                             | yes             | 1.01e+004                     | 4769.72   | 2.28e+004 | 5619.48   |  |
| VDSHFR              | 3010        | 8.71  | 5    | 759.3659  | 1      |      | 0         |                                             | no              | 4.04e+004                     | 5.40e+004 | 8.85e+004 | 3.70e+004 |  |
| VDSHFR              | 3391        | 8.71  | 5    | 759.3723  | 2      |      | 0         |                                             | no              | 1.17e+004                     | 4.55e+004 | 5.23e+004 | 1.97e+004 |  |
| YGAATFTR            | 1217        | 9.19  | 7    | 885.4315  | 2      |      | 0         |                                             | yes             | 4.34e+004                     | 1.73e+005 | 1.72e+005 | 3.39e+004 |  |

Fragment ions for: ATVLNLYPK

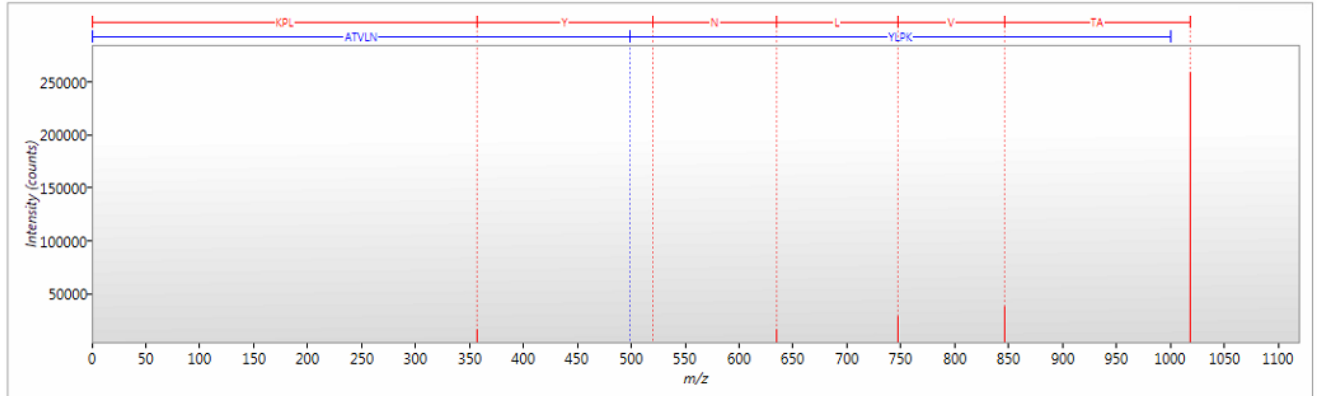

Fragment ions for: SSGSLNNIAIK

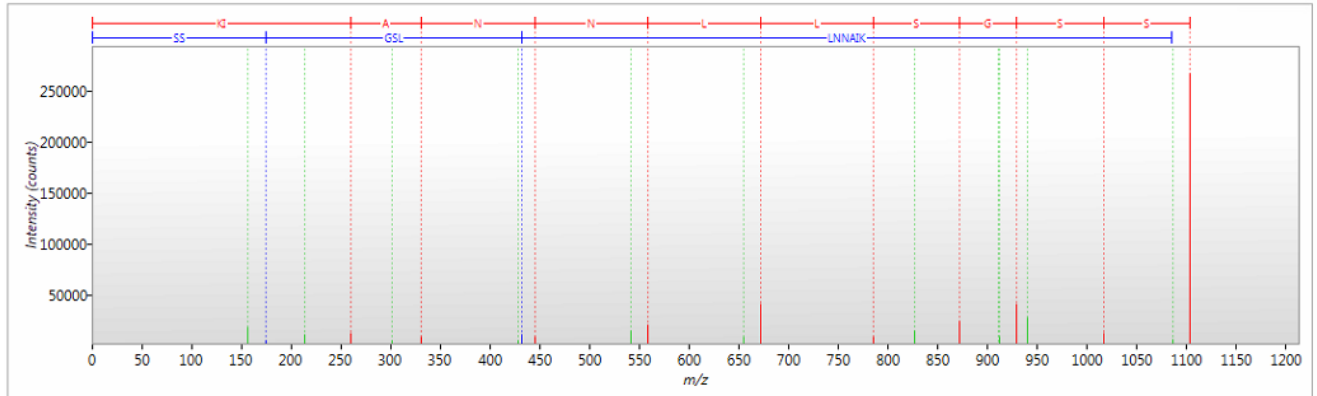

Fragment ions for: YGAATFTR

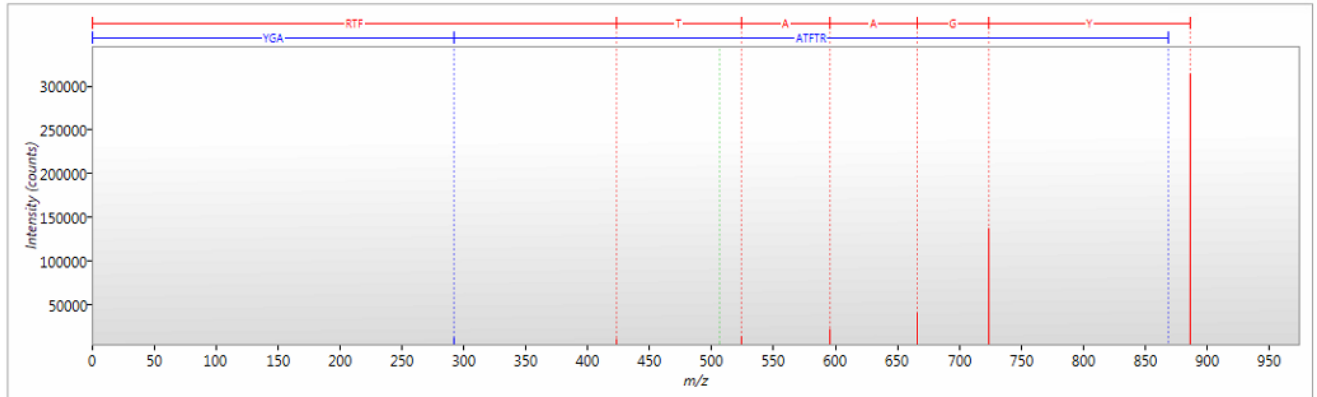



Prostaglandin-H2 D-isomerase O5=Homo sapiens GN=PTGDS PE=1 SV=1  
9 peptides

| Sequence                            | Peptide Ion | Score | Hits | Mass      | Charge | Tags | Conflicts | Modifications                            | In quantitation | Average Normalised Abundances |           |           |           |
|-------------------------------------|-------------|-------|------|-----------|--------|------|-----------|------------------------------------------|-----------------|-------------------------------|-----------|-----------|-----------|
|                                     |             |       |      |           |        |      |           |                                          |                 | PCa                           | BRH       | Sc        | Rc        |
| AQGFTEDTIVFLPQTDK                   | 93          | 10.15 | 38   | 1908.9483 | 2      |      | 0         |                                          | yes             | 6.98e+006                     | 3.46e+006 | 8.58e+005 | 3.96e+006 |
| AQGFTEDTIVFLPQTDK                   | 625         | 10.15 | 38   | 1908.9242 | 3      |      | 0         |                                          | yes             | 1.24e+006                     | 8.88e+005 | 5.40e+005 | 6.90e+005 |
| AQGFTEDTIVFLPQTDK                   | 11612       | ---   | ---  | 1908.9079 | 1      |      | 0         |                                          | yes             | 5.51e+004                     | 9478.26   | 5261.12   | 2.48e+004 |
| AQGFTEDTIVFLPQTDK <sup>CM</sup> TEQ | 2544        | 9.64  | 11   | 2558.1465 | 2      |      | 1         | [18] Carbamidomethyl C                   | no              | 3.08e+005                     | 2.88e+005 | 2.34e+005 | 5.02e+005 |
| AQGFTEDTIVFLPQTDK <sup>CM</sup> TEQ | 913         | 9.64  | 11   | 2558.1419 | 3      |      | 1         | [18] Carbamidomethyl C                   | no              | 1.06e+006                     | 3.43e+005 | 2.11e+005 | 9.77e+005 |
| AQGFTEDTIVFLPQTDK <sup>CM</sup> TEQ | 2717        | 9.04  | 26   | 2574.1621 | 2      |      | 0         | [18] Carbamidomethyl C; [19] Oxidation M | no              | 5.19e+005                     | 6.63e+004 | 3.52e+004 | 1.87e+005 |
| AQGFTEDTIVFLPQTDK <sup>CM</sup> TEQ | 882         | 9.04  | 26   | 2574.1686 | 3      |      | 0         | [18] Carbamidomethyl C; [19] Oxidation M | no              | 1.42e+006                     | 4.78e+005 | 2.44e+005 | 6.60e+005 |
| FTAF <sup>CK</sup>                  | 1057        | 9.17  | 29   | 772.3566  | 1      |      | 0         | [5] Carbamidomethyl C                    | no              | 6.44e+005                     | 3.17e+005 | 1.82e+005 | 3.94e+005 |
| FTAF <sup>CK</sup>                  | 548         | 9.17  | 29   | 772.3619  | 2      |      | 0         | [5] Carbamidomethyl C                    | no              | 5.64e+005                     | 5.81e+005 | 2.23e+005 | 3.20e+005 |
| GPGE <sup>DFR</sup>                 | 280         | 9.01  | 26   | 776.3640  | 2      |      | 1         |                                          | no              | 5.94e+005                     | 6.92e+005 | 2.79e+005 | 4.99e+005 |
| MATLYSR                             | 949         | 9.26  | 29   | 840.4121  | 2      |      | 0         |                                          | no              | 2.92e+005                     | 2.37e+005 | 1.27e+005 | 2.37e+005 |
| MATLYSR                             | 3339        | 9.26  | 26   | 840.4057  | 1      |      | 0         |                                          | no              | 9.29e+004                     | 4.33e+004 | 4.02e+004 | 1.21e+005 |
| <sup>M</sup> MATLYSR                | 2152        | 8.75  | 4    | 856.4152  | 2      |      | 0         | [1] Oxidation M                          | no              | 1.15e+005                     | 8.90e+004 | 4.81e+004 | 4.99e+004 |
| <sup>M</sup> MATLYSR                | 10858       | 7.96  | 6    | 856.4169  | 2      |      | 0         | [1] Oxidation M                          | no              | 1.23e+004                     | 4688.58   | 1426.55   | 7352.22   |
| TMLLQPAGSLGSYSYR                    | 14880       | 8.95  | 8    | 1742.8515 | 1      |      | 0         |                                          | yes             | 1.23e+004                     | 1411.25   | 2841.06   | 2.69e+004 |
| TMLLQPAGSLGSYSYR                    | 156         | 9.98  | 35   | 1742.8614 | 2      |      | 0         |                                          | yes             | 3.14e+006                     | 1.50e+006 | 5.87e+005 | 3.15e+006 |
| <sup>T</sup> MLLQPAGSLGSYSYR        | 1709        | 9.19  | 4    | 1758.8468 | 2      |      | 0         | [2] Oxidation M                          | no              | 8.75e+005                     | 3.85e+005 | 3.46e+005 | 5.71e+005 |
| <sup>T</sup> MLLQPAGSLGSYSYR        | 388         | 9.37  | 32   | 1758.8416 | 2      |      | 0         | [2] Oxidation M                          | yes             | 2.23e+006                     | 1.88e+006 | 4.64e+005 | 1.33e+006 |

Fragment ions for: AQGFTEDTIVFLPQTDK

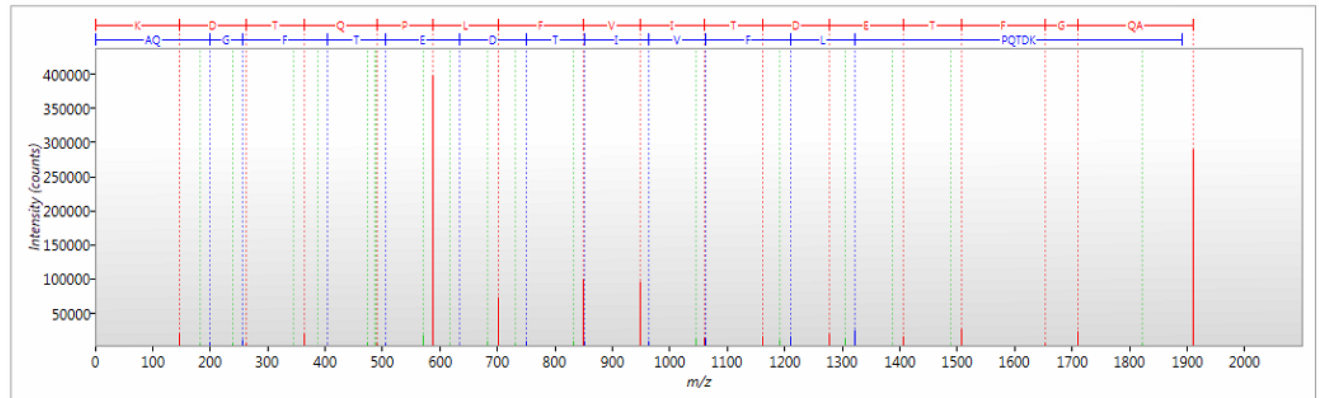

Fragment ions for: TMLLQPAGSLGSYSYR

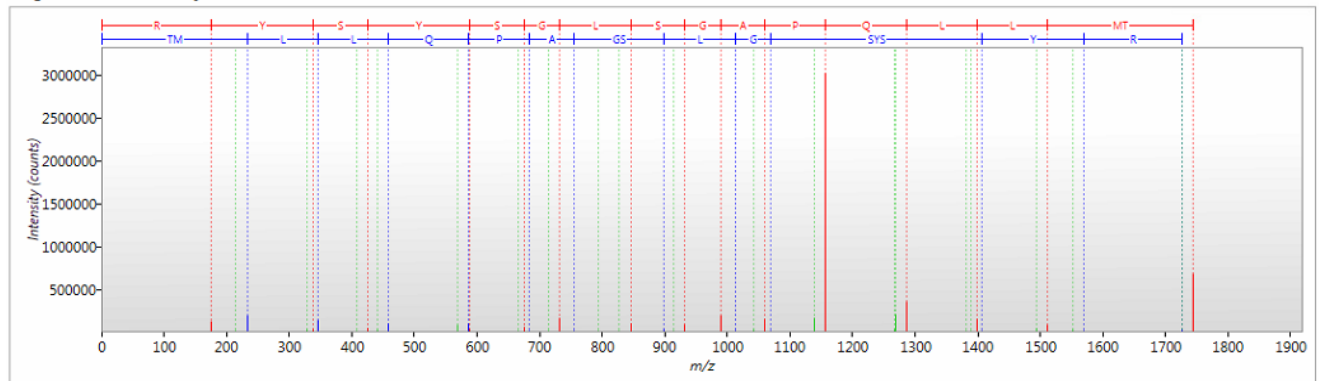

Fragment ions for: TMLLQPAGSLGSYSYR

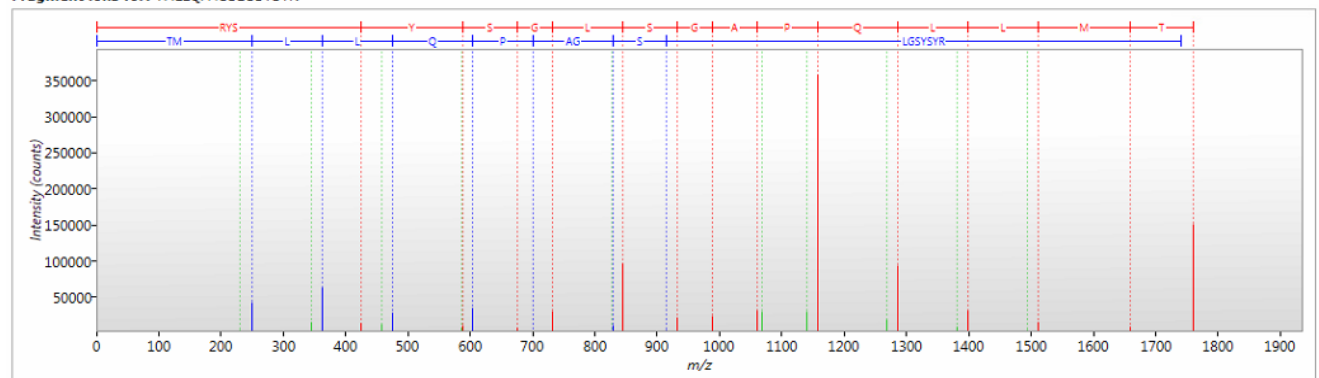

Protein S100-A9 OS=Homo sapiens GN=S100A9 PE=1 SV=1  
3 peptides

| Sequence     | Peptide Ion | Score | Hits | Mass      | Charge | Tags | Conflicts | Modifications | In quantitation | Average Normalised Abundances |           |           |           |
|--------------|-------------|-------|------|-----------|--------|------|-----------|---------------|-----------------|-------------------------------|-----------|-----------|-----------|
|              |             |       |      |           |        |      |           |               |                 | PCa                           | BPH       | Bc        | Rc        |
| DLQNFLK      | 2467        | 8.49  | 5    | 876.4655  | 2      |      | 0         |               | yes             | 1.90e+004                     | 1.13e+005 | 4.15e+004 | 3.72e+004 |
| LGHPTLNQGEFK | 3621        | 9.24  | 4    | 1454.7006 | 2      |      | 0         |               | yes             | 3.02e+004                     | 2.08e+005 | 2.24e+004 | 7.36e+004 |
| LGHPTLNQGEFK | 5004        | 6.41  | 2    | 1454.6958 | 2      |      | 0         |               | yes             | 1.24e+004                     | 7.77e+004 | 6.62e+004 | 2.11e+004 |
| LTVASHEK     | 12038       | 8.88  | 2    | 970.4358  | 3      |      | 0         |               | no              | 534.46                        | 1360.21   | 4493.00   | 828.10    |

Fragment ions for: DLQNFLK

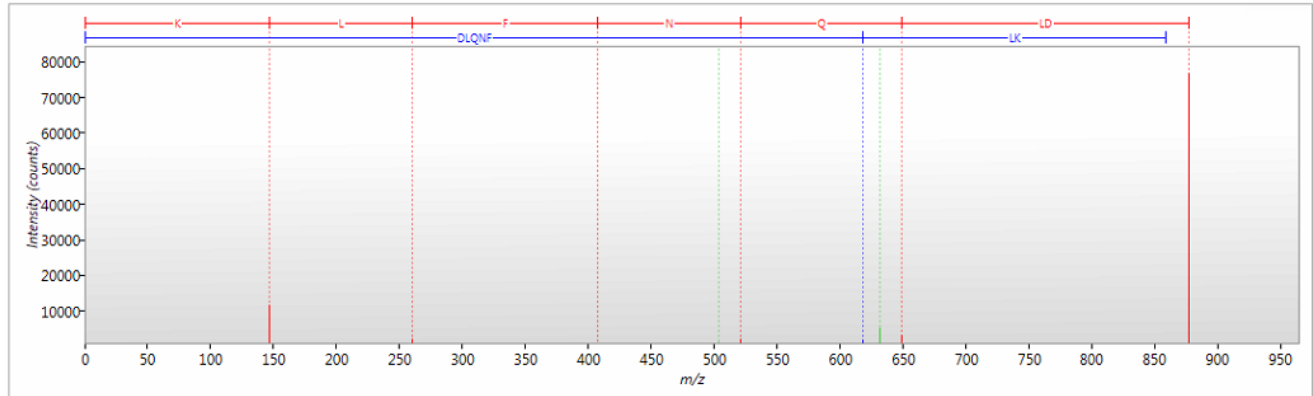

Fragment ions for: LGHPTLNQGEFK

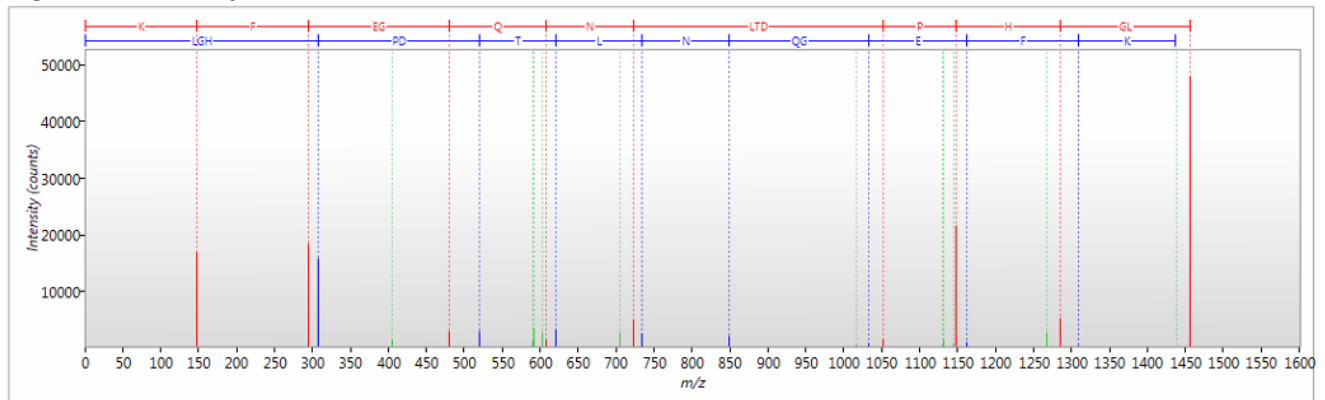

Fragment ions for: LGHPTLNQGEFK

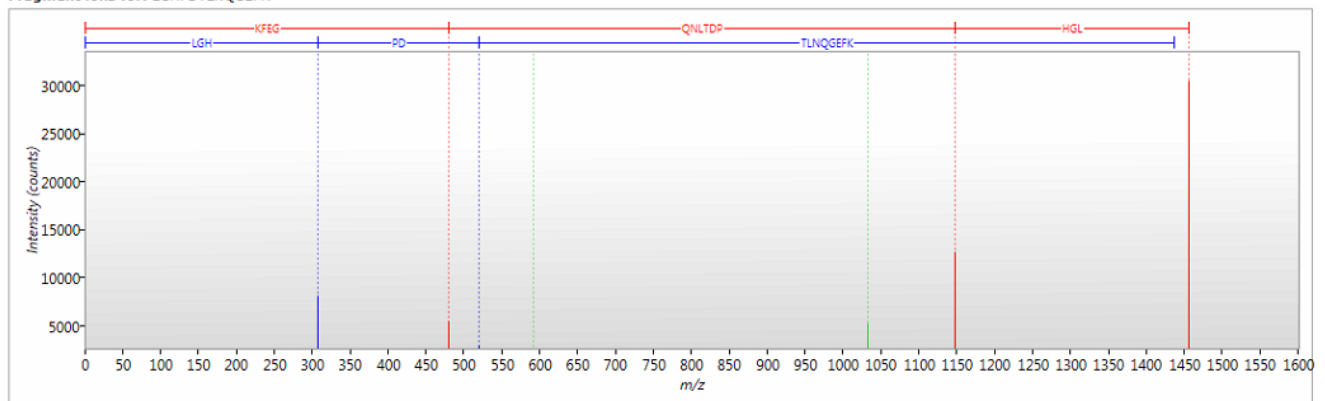

Roundabout homolog 4 OS=Homo sapiens GN=ROBO4 PE=1 SV=1  
7 peptides

| Sequence                                          | Peptide Ion | Score | Hits | Mass      | Charge | Tags | Conflicts | Modifications         | In quantitation | Average Normalised Abundances |           |           |           |
|---------------------------------------------------|-------------|-------|------|-----------|--------|------|-----------|-----------------------|-----------------|-------------------------------|-----------|-----------|-----------|
|                                                   |             |       |      |           |        |      |           |                       |                 | PCa                           | BPH       | Bc        | Rc        |
| APSPPTTYGYSVPTASEFTDMGR                           | 390         | 5.64  | 2    | 2544.1176 | 2      |      | 0         |                       | yes             | 1.71e+006                     | 4.42e+006 | 3.11e+006 | 2.26e+006 |
| EADCVFIDASSPPSPRDEIFLTPNLSLPLVEV/RPDI/LEDMEVSHQTR | 21052       | 6.15  | 2    | 5580.5106 | 4      |      | 0         | [4] Carbamidomethyl C | no              | 1868.24                       | 4.35e+004 | 0.00      | 8204.29   |
| EDFQIQPR                                          | 17680       | 7.54  | 11   | 1031.4570 | 1      |      | 0         |                       | no              | 2.81e+004                     | 1.46e+004 | 1.99e+004 | 3.63e+004 |
| GPDSNVLLLR                                        | 2983        | 7.49  | 12   | 1082.5865 | 2      |      | 0         |                       | yes             | 5.62e+004                     | 7.05e+004 | 9.01e+004 | 9.19e+004 |
| LGTAIVSR                                          | 6941        | 6.90  | 7    | 702.3889  | 1      |      | 0         |                       | no              | 7990.78                       | 6202.56   | 3313.03   | 1.63e+004 |
| MDHSDSQV/LADTVVRSTSGSR                            | 9600        | 5.58  | 2    | 2338.0510 | 3      |      | 0         | [1] Oxidation M       | no              | 5.36e+004                     | 2.94e+004 | 2.95e+004 | 6.58e+004 |
| VSIQEPQDYTEPVLLAVR                                | 4592        | 8.20  | 16   | 2185.1077 | 2      |      | 0         |                       | yes             | 1.15e+005                     | 2.51e+004 | 9606.89   | 1.68e+005 |
| VSIQEPQDYTEPVLLAVR                                | 4830        | 8.20  | 16   | 2185.0882 | 3      |      | 0         |                       | yes             | 1.58e+005                     | 1.32e+005 | 1.44e+005 | 1.74e+005 |

Fragment ions for: APSPPTTYGYSVPTASEFTDMGR

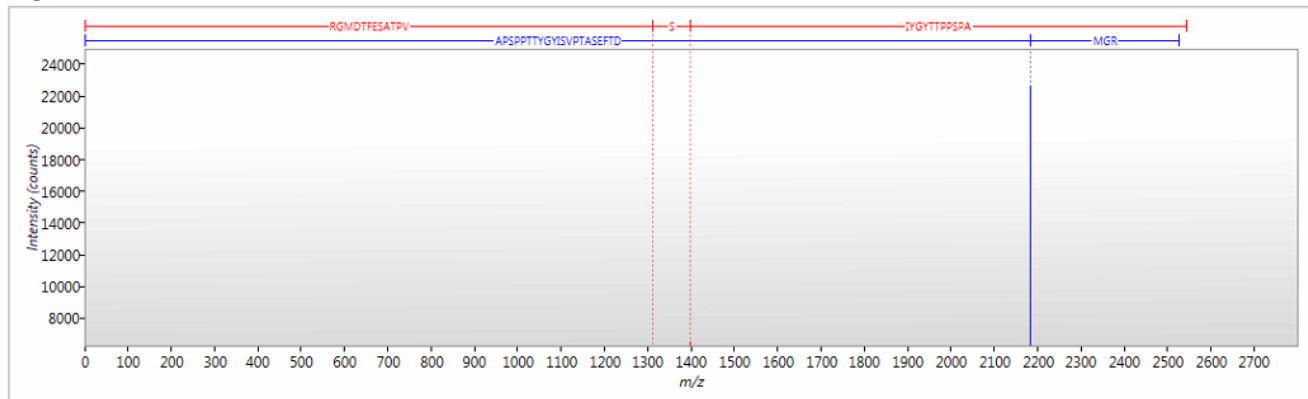

Fragment ions for: GPDSNVLLLR

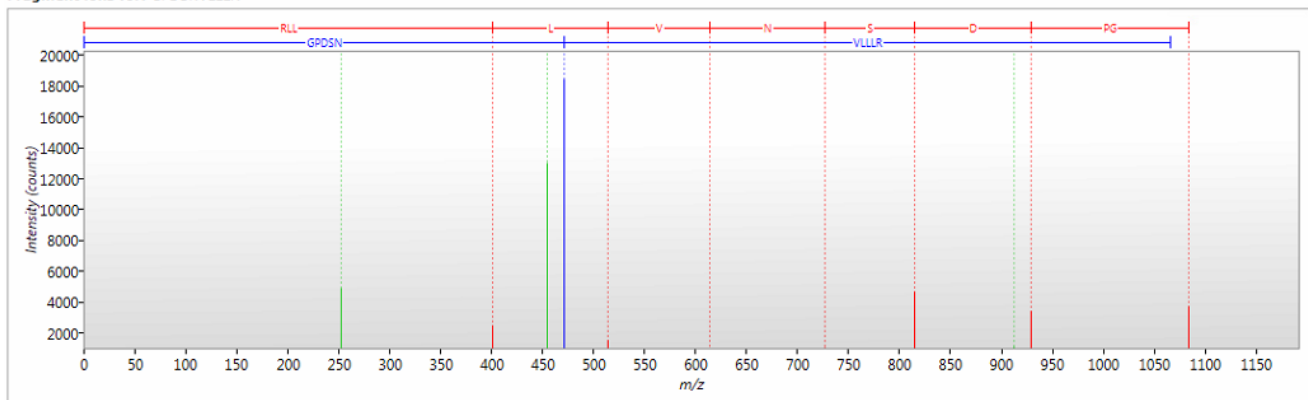

Fragment ions for: VSIQEPQDYTEPVLLAVR

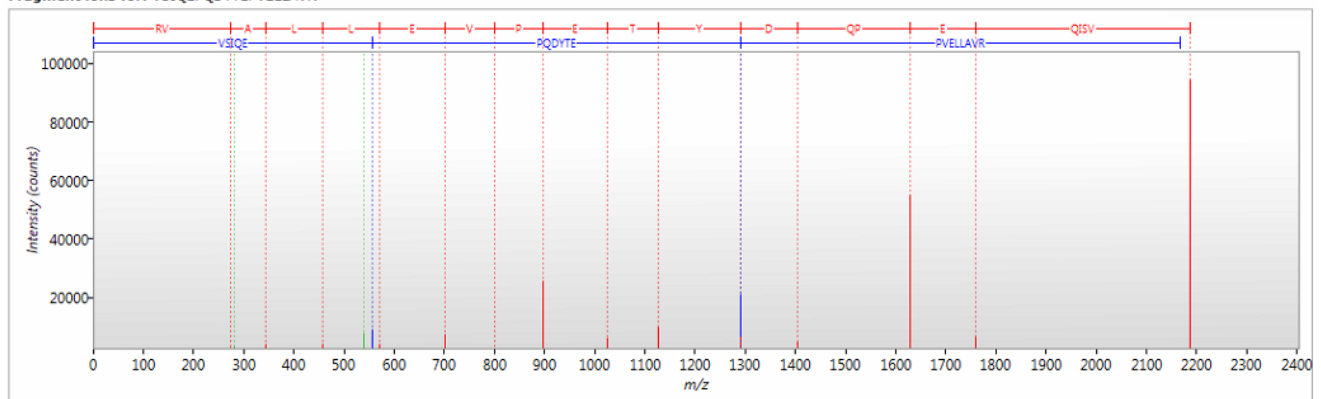

Vesicular integral-membrane protein VIP36 OS=Homo sapiens GN=LMAN2 PE=1 SV=1  
9 peptides

| Sequence                    | Peptide Ion | Score | Hits | Mass      | Charge | Tags | Conflicts | Modifications         | In quantitation | Average Normalised Abundances |           |           |           |
|-----------------------------|-------------|-------|------|-----------|--------|------|-----------|-----------------------|-----------------|-------------------------------|-----------|-----------|-----------|
|                             |             |       |      |           |        |      |           |                       |                 | PCa                           | BPH       | Bc        | Re        |
| AAEGVIV/R                   | 3544        | 7.00  | 4    | 987.5068  | 2      |      | 0         |                       | no              | 1.34e+005                     | 9.31e+004 | 7.22e+004 | 8.57e+004 |
| DNFHGLAIFLDYTPNDETER        | 4549        | 8.20  | 15   | 2467.1506 | 3      |      | 0         |                       | no              | 1.48e+005                     | 1.58e+005 | 7.10e+004 | 1.68e+005 |
| DNFHGLAIFLDYTPNDETER        | 29751       | 8.20  | 16   | 2467.1240 | 2      |      | 0         |                       | no              | 4327.03                       | 3706.71   | 1707.87   | 7300.71   |
| DNFHGLAIFLDYTPNDETER        | 37431       | 7.83  | 2    | 2467.1291 | 2      |      | 0         |                       | no              | 4126.89                       | 1783.71   | 1965.75   | 406.51    |
| LFQLMVEHTPDEESIDWTK         | 3962        | 6.38  | 2    | 2333.0968 | 2      |      | 0         | [5] Oxidation M       | yes             | 1.15e+006                     | 2.16e+005 | 1.85e+005 | 1.35e+006 |
| LPTGYFFGASAGTGDLSDNHDIIISMK | 4819        | 7.17  | 5    | 2729.2700 | 3      |      | 0         |                       | yes             | 2.45e+005                     | 1.82e+005 | 8.35e+004 | 3.29e+005 |
| LTPDER                      | 3286        | 7.50  | 4    | 729.3533  | 1      |      | 1         |                       | no              | 5.56e+004                     | 2.95e+004 | 2.29e+004 | 4.60e+004 |
| LVPGPVFGSK                  | 2711        | 8.52  | 24   | 999.5716  | 2      |      | 0         |                       | no              | 1.93e+005                     | 2.16e+005 | 1.63e+005 | 2.04e+005 |
| LVPGPVFGSK                  | 9165        | 8.37  | 20   | 999.5691  | 1      |      | 0         |                       | no              | 1.44e+004                     | 1.41e+004 | 8625.87   | 2.33e+004 |
| NCIDITGVR                   | 523         | 7.99  | 21   | 1046.5196 | 2      |      | 0         | [2] Carbamidomethyl C | yes             | 1.24e+006                     | 1.18e+006 | 7.86e+005 | 1.03e+006 |
| NCIDITGVR                   | 6622        | 7.99  | 21   | 1046.4685 | 1      |      | 0         | [2] Carbamidomethyl C | yes             | 9.21e+004                     | 3.85e+004 | 7.28e+004 | 7.59e+004 |
| NRDHDFTLAVR                 | 4224        | 8.35  | 3    | 1342.6747 | 3      |      | 0         |                       | no              | 4.65e+004                     | 897.27    | 1.15e+004 | 1459.84   |
| NRDHDFTLAVR                 | 4641        | 8.46  | 2    | 1342.6746 | 3      |      | 0         |                       | no              | 5.60e+004                     | 4795.46   | 354.47    | 1902.85   |
| VTLAGCTADFR                 | 19989       | 8.89  | 23   | 1425.6304 | 1      |      | 0         | [7] Carbamidomethyl C | no              | 9051.30                       | 1187.95   | 657.15    | 1.35e+004 |
| VTLAGCTADFR                 | 41394       | 7.84  | 3    | 1425.6358 | 1      |      | 0         | [7] Carbamidomethyl C | no              | 5433.61                       | 2859.72   | 1088.07   | 527.13    |

Fragment ions for: LFQLMVEHTPDEESIDWTK

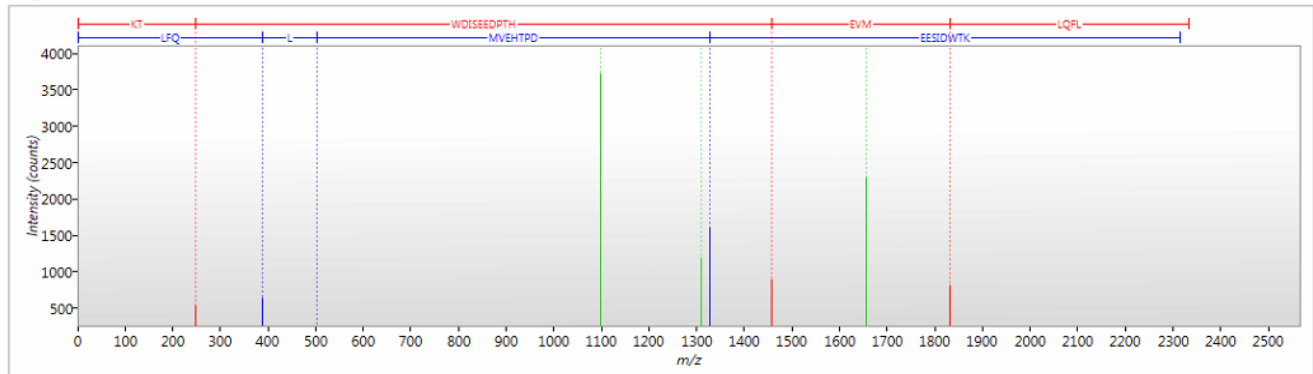

Fragment ions for: LPTGYFFGASAGTGDLSDNHDIIISMK

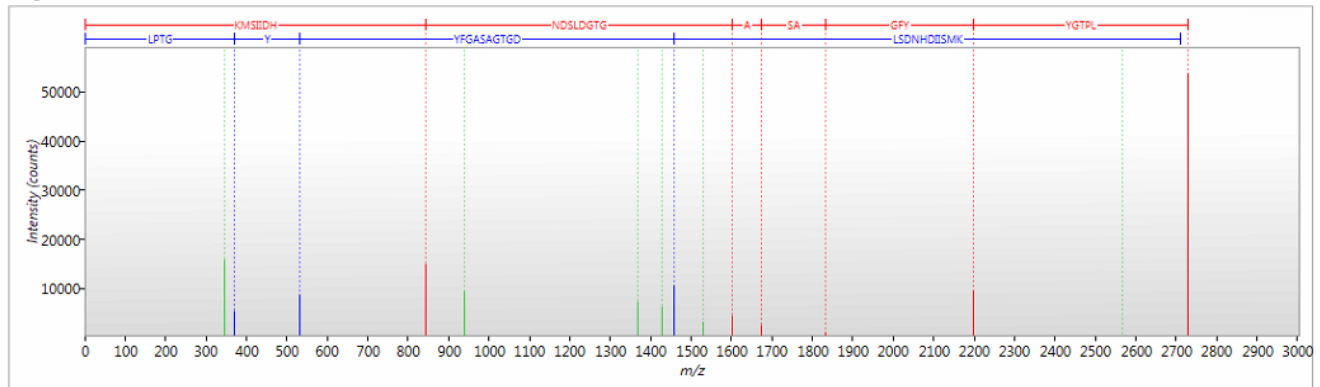

Fragment ions for: NCIDITGVR

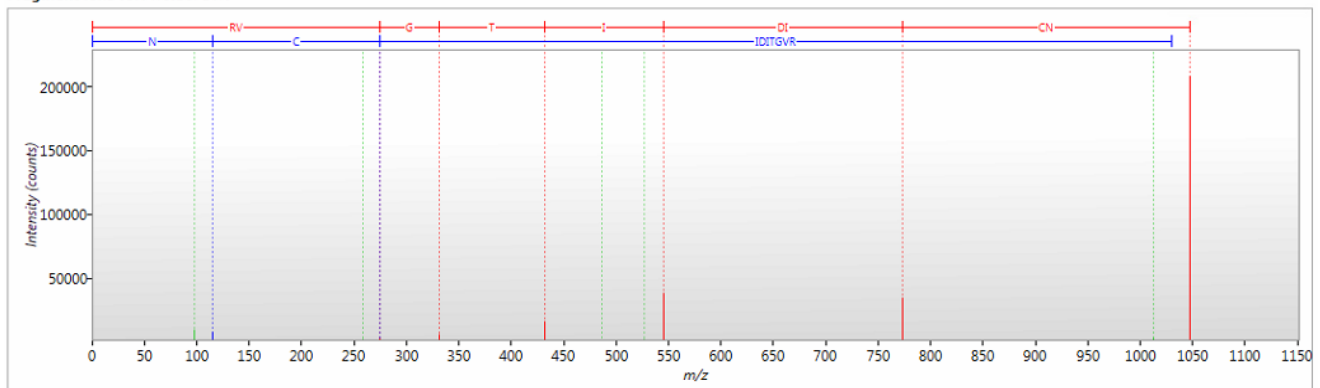

Inter-alpha-trypsin inhibitor heavy chain H4 OS=Homo sapiens GN=ITI4 PE=1 SV=4  
9 peptides

| Sequence                               | Peptide Ion | Score | Hits | Mass      | Charge | Tags | Conflicts | Modifications          | In quantitation | Average Normalised Abundances |           |           |           |
|----------------------------------------|-------------|-------|------|-----------|--------|------|-----------|------------------------|-----------------|-------------------------------|-----------|-----------|-----------|
|                                        |             |       |      |           |        |      |           |                        |                 | PCa                           | DPH       | BC        | TC        |
| FKPTLSQQQK                             | 5105        | 6.52  | 6    | 1203.5503 | 2      |      | 0         |                        | no              | 7.52e+004                     | 1.21e+005 | 1.05e+005 | 6.72e+004 |
| GPDVLVTATVSGK                          | 5806        | 7.51  | 3    | 1143.5913 | 2      |      | 0         |                        | no              | 5.70e+004                     | 5.00e+004 | 6.23e+004 | 4.76e+004 |
| HLQMDIHIFEPQGISFLETSTFMTNQLVDALTTV/QNK | 43407       | 6.00  | 2    | 4478.1712 | 4      |      | 0         | [24] Oxidation M       | no              | 836.93                        | 2862.93   | 3077.83   | 868.01    |
| LDYQEGPGPVEISCIVSEL                    | 2346        | 9.21  | 28   | 2177.0087 | 2      |      | 0         | [14] Carbamidomethyl C | yes             | 6.07e+005                     | 1.89e+005 | 9.82e+004 | 6.71e+005 |
| NMEQFYQVSIVAPNAK                       | 7467        | 6.21  | 2    | 1747.8319 | 3      |      | 0         |                        | no              | 2.09e+004                     | 2.81e+004 | 3.70e+004 | 1.48e+004 |
| NPLVVVHASPEHVVVTR                      | 1250        | 7.67  | 14   | 1939.0153 | 3      |      | 0         |                        | yes             | 8.85e+005                     | 1.00e+006 | 3.51e+005 | 1.99e+006 |
| NPLVVVHASPEHVVVTR                      | 1539        | 7.28  | 2    | 1939.0350 | 3      |      | 0         |                        | no              | 7.17e+004                     | 8.20e+004 | 4.29e+004 | 2.36e+005 |
| NPLVVVHASPEHVVVTR                      | 2112        | 7.74  | 6    | 1939.0320 | 3      |      | 0         |                        | no              | 4.19e+005                     | 2.16e+005 | 1.97e+005 | 5.89e+004 |
| NPLVVVHASPEHVVVTR                      | 7043        | 7.28  | 3    | 1939.0176 | 4      |      | 0         |                        | no              | 4574.78                       | 918.17    | 6930.64   | 2.79e+004 |
| QGPVNLLSDPEQGVETGQYER                  | 685         | 9.15  | 31   | 2414.1764 | 3      |      | 0         |                        | yes             | 9.57e+005                     | 6.54e+005 | 3.56e+005 | 1.32e+006 |
| QGPVNLLSDPEQGVETGQYER                  | 1009        | 9.15  | 33   | 2414.1718 | 2      |      | 0         |                        | yes             | 9.24e+005                     | 2.55e+005 | 1.68e+005 | 1.43e+006 |
| QGPVNLLSDPEQGVETGQYEREK                | 1572        | 8.79  | 13   | 2671.2884 | 3      |      | 0         |                        | no              | 3.77e+005                     | 1.00e+005 | 5.91e+004 | 6.62e+005 |
| QGPVNLLSDPEQGVETGQYEREK                | 2676        | 8.88  | 3    | 2671.2618 | 3      |      | 0         |                        | no              | 2.87e+005                     | 3.38e+004 | 3.72e+004 | 4.95e+004 |
| QGPVNLLSDPEQGVETGQYEREK                | 19102       | 8.79  | 10   | 2671.2978 | 2      |      | 0         |                        | no              | 1.98e+004                     | 5078.58   | 2823.05   | 2.72e+004 |
| SPEQQTVDGNLIIR                         | 6163        | 7.55  | 10   | 1810.9765 | 3      |      | 0         |                        | no              | 1.32e+005                     | 3.86e+004 | 1.27e+005 | 2.58e+004 |

Fragment ions for: LDYQEGPPGVEISCWSVEL

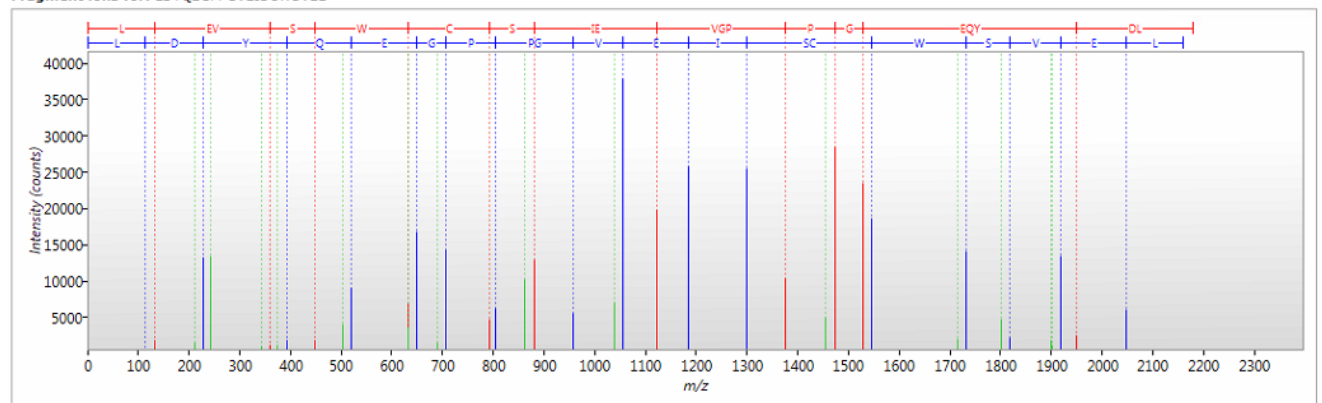

**Fragment ions for: NPLVWVHASPEHVVTR**

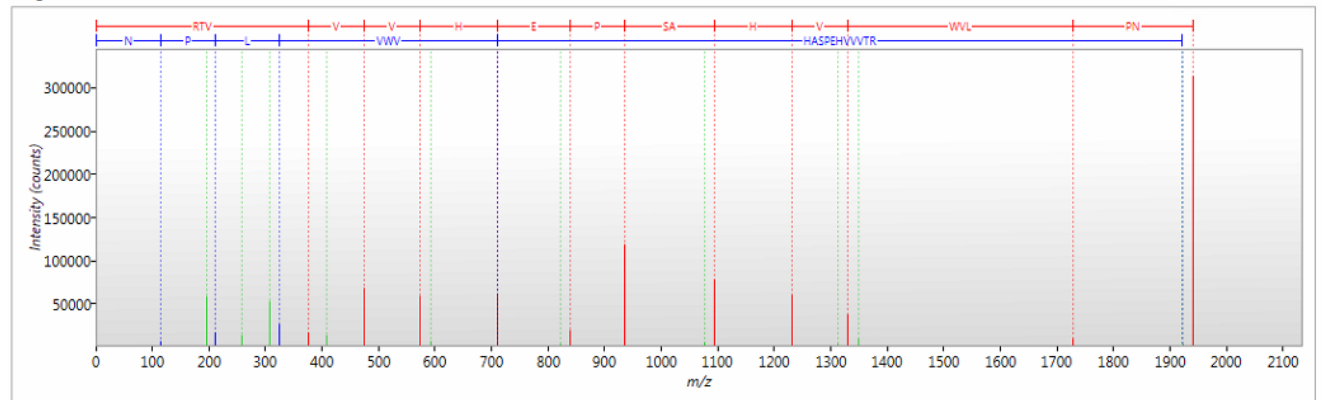

**Fragment ions for: QGPVNLLSDPEQGVETGQYER**

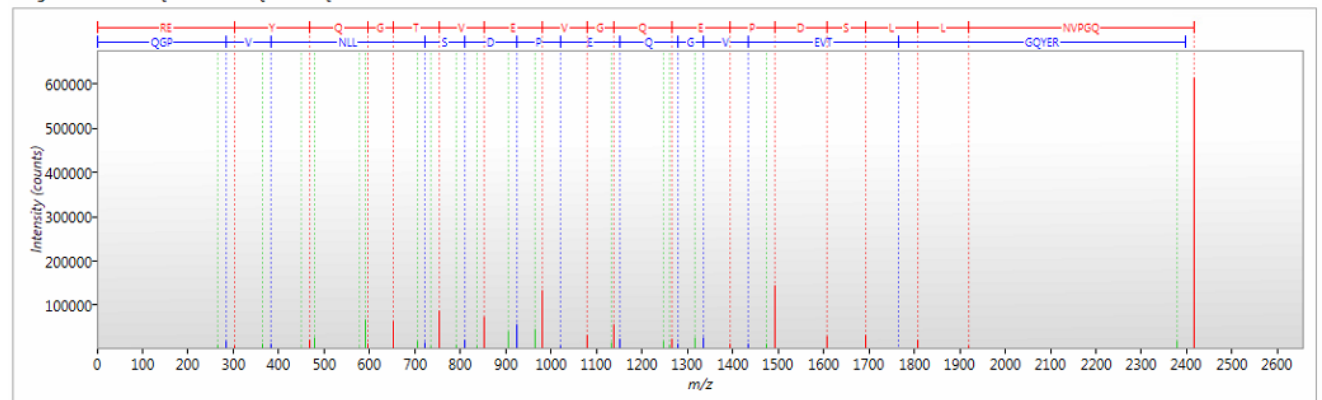

Actin\_ gamma-enteric smooth muscle OS=Homo sapiens GN=ACTG2 PE=1 SV=1  
3 peptides

| Sequence                             | Peptide Ion | Score | Hits | Mass      | Charge | Tags | Conflicts | Modifications    | In quantitation | Average Normalised Abundances |           |           |           |
|--------------------------------------|-------------|-------|------|-----------|--------|------|-----------|------------------|-----------------|-------------------------------|-----------|-----------|-----------|
|                                      |             |       |      |           |        |      |           |                  |                 | PCa                           | BPH       | Bc        | Bc        |
| DLYANNVLSGGTTMYPGIADRMQK             | 3540        | 5.42  | 2    | 2630.2275 | 3      |      | 0         | [14] Oxidation M | yes             | 2.62e+006                     | 2.35e+006 | 1.66e+006 | 1.40e+006 |
| IIAPPER                              | 4810        | 7.87  | 5    | 794.4334  | 2      |      | 0         |                  | yes             | 1.92e+004                     | 4.75e+004 | 1.73e+004 | 1.76e+004 |
| YSVWIGGSILASLSTFQQMWISKPEYDEAGPSIVHR | 19385       | 6.34  | 2    | 4052.0663 | 4      |      | 0         |                  | yes             | 2.17e+005                     | 1.84e+004 | 1.45e+004 | 1.78e+005 |

Fragment ions for: DLYANNVLSGGTTMYPGIADRMQK

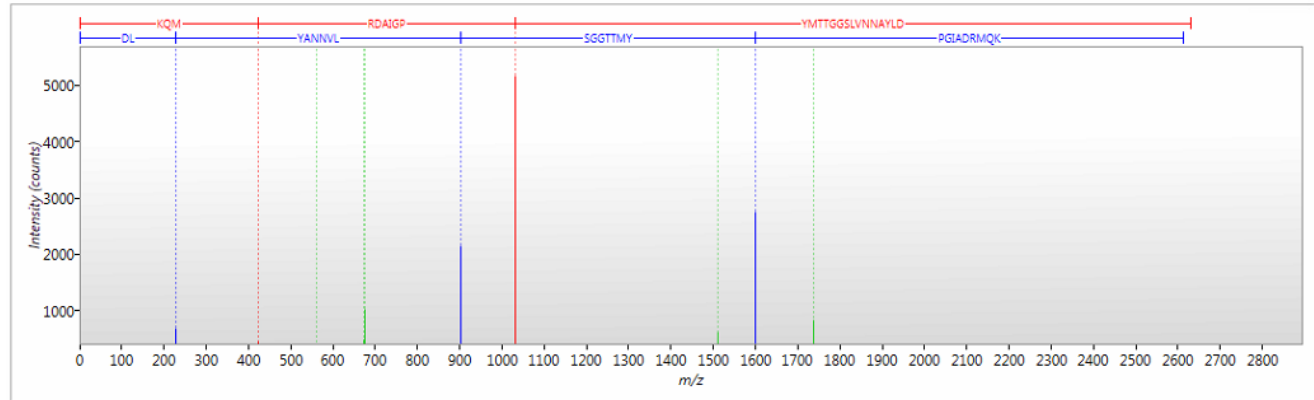

Fragment ions for: IIAPPER

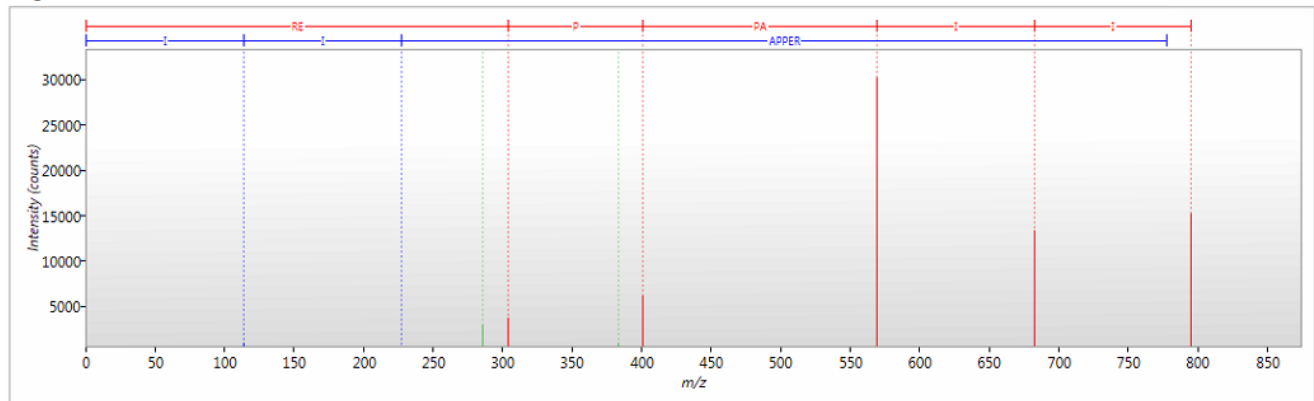

Fragment ions for: YSVWIGGSILASLSTFQQMWISKPEYDEAGPSIVHR

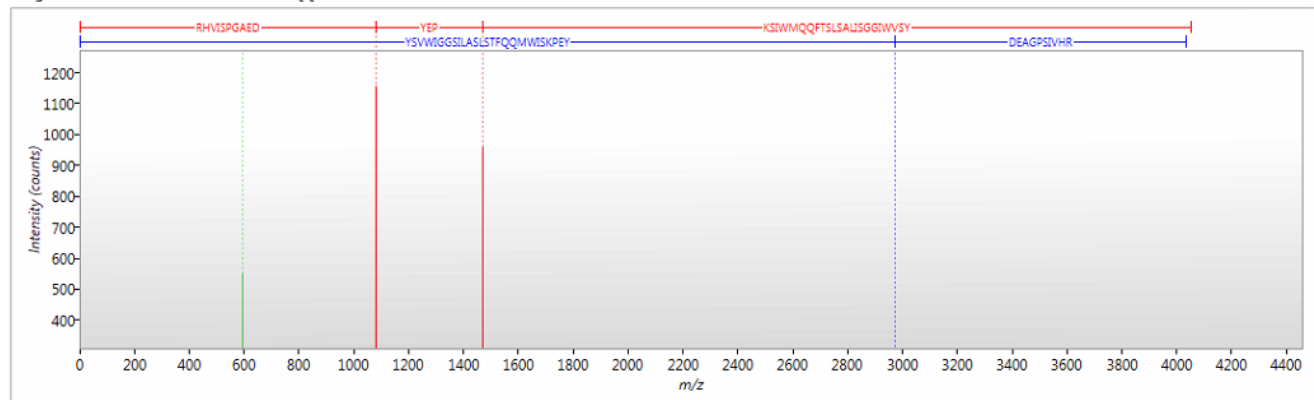

Cathepsin B OS=Homo sapiens GN=CTSB PE=1 SV=3  
3 peptides

| Sequence                               | Peptide Ion | Score | Hits | Mass      | Charge | Tags | Conflicts | Modifications                                | In quantitation | Average Normalised Abundances |           |           |           |
|----------------------------------------|-------------|-------|------|-----------|--------|------|-----------|----------------------------------------------|-----------------|-------------------------------|-----------|-----------|-----------|
|                                        |             |       |      |           |        |      |           |                                              |                 | pCa                           | BPH       | Bc        | Rc        |
| DQGS <b>C</b> GS <b>C</b> WAFGAVEAISDR | 13303       | 5.24  | 2    | 2172.1343 | 2      |      | 0         | [5] Carbamidomethyl C; [8] Carbamidomethyl C | yes             | 2.55e+004                     | 5.64e+004 | 7.73e+004 | 6.56e+004 |
| EQWPQ <b>C</b> PTIK                    | 28839       | 6.47  | 3    | 1285.6436 | 1      |      | 0         | [6] Carbamidomethyl C                        | yes             | 501.68                        | 835.09    | 4987.48   | 3536.74   |
| <b>i</b> CEPGYSPTYK                    | 62          | 7.34  | 4    | 1313.6574 | 2      |      | 1         | [2] Carbamidomethyl C                        | no              | 1.61e+006                     | 3.81e+006 | 1.63e+007 | 1.35e+006 |

Fragment ions for: DQGSGSCWAFGAVEAISDR

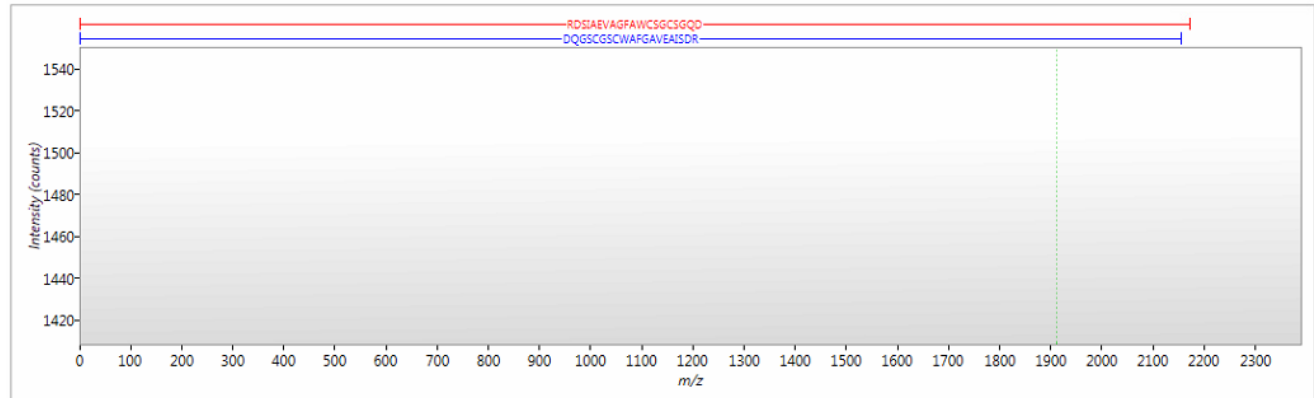

Fragment ions for: EQWPQCPTIK

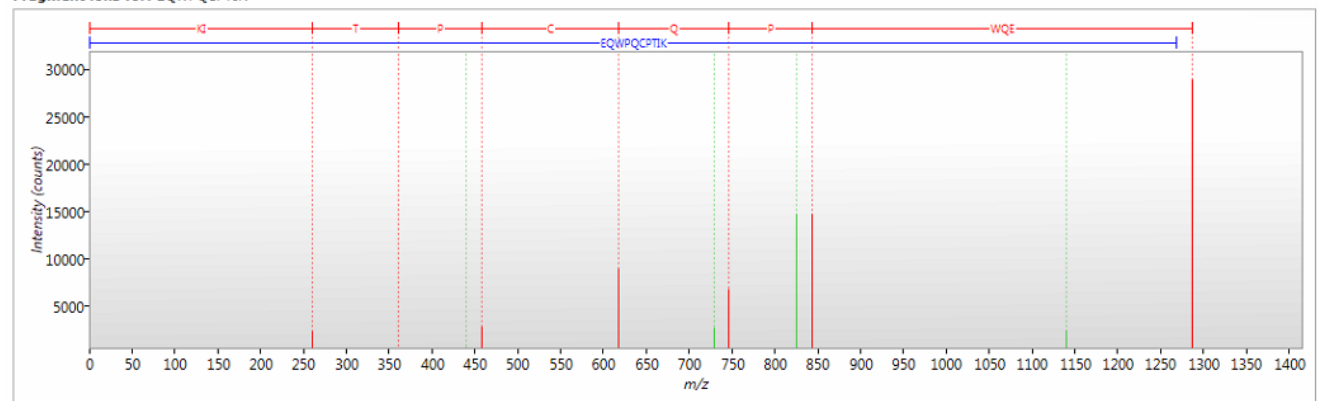

Supplement: s1 [file s1]
